# Supplementary material for: A cross sectional survey on health-related quality of life of elementary school students using the Korean version of the EQ-5D-Y
Source: PeerJ. 2017 Mar 21;5:e3115. doi: 10.7717/peerj.3115 (PMC5363254; doi:10.7717/peerj.3115)
Supplement: Data S1 [file peerj-05-3115-s001.xlsx]

## Sheet: raw
ID	surveydate	school	grade	sex	age	P_sex	P_age	P_edu	P_Mo	P_Sc	P_UA	P_PD	P_AD	P_vas	S_Mo	S_Sc	S_UA	S_PD	S_AD	S_vas
1	20150520	A	1	1	7	2	42	.	1	1	1	1	1	80	1	1	1	1	1	95
2	20150520	A	1	2	7	2	38	4	1	1	1	1	2	100	1	1	1	1	.	100
3	20150520	A	1	1	7	2	43	4	1	1	1	1	1	80	1	2	1	1	1	100
4	20150520	A	1	2	7	2	30	4	1	1	1	1	1	85	1	1	1	1	1	100
5	20150520	A	1	1	7	2	33	.	1	1	1	1	1	90	1	1	1	1	1	100
6	20150522	A	1	1	7	2	36	3	1	1	1	1	1	100	1	1	1	1	1	100
7	20150520	A	1	2	7	2	39	3	1	1	1	1	2	80	1	1	1	1	2	100
8	20150520	A	1	2	7	2	31	3	1	1	1	1	1	100	1	1	1	1	1	100
9	20150521	A	1	1	7	1	32	3	1	1	1	2	1	60	1	1	1	1	1	80
10	20150520	A	1	1	7	2	40	3	1	1	1	1	2	80	1	1	1	1	1	95
11	20150520	A	1	2	7	1	38	3	.	.	.	.	.	100	1	1	1	1	1	.
12	20150520	A	1	2	7	1	38	3	.	.	.	.	.	100	1	1	1	1	1	.
13	20150520	A	1	1	7	2	31	4	1	1	1	2	1	95	1	1	1	1	1	100
14	20150520	A	1	2	7	2	37	3	1	1	1	2	3	60	1	1	1	1	2	100
15	20150520	A	1	2	7	2	39	4	1	1	1	1	2	80	1	1	1	1	1	95
16	20150520	A	1	1	7	2	37	3	1	1	1	1	1	90	2	2	2	2	1	.
17	20150519	A	2	1	8	2	45	2	1	1	1	1	1	90	1	1	1	1	1	85
18	20150520	A	2	1	8	2	42	3	1	1	1	1	1	90	1	1	1	1	1	80
19	20150519	A	2	1	8	2	36	4	1	1	1	1	1	90	1	1	1	1	1	100
20	20150519	A	2	1	8	1	32	3	1	1	1	1	2	80	1	1	1	1	1	50
21	20150519	A	2	2	8	2	48	3	1	1	1	1	2	90	1	1	1	1	1	95
22	20150519	A	2	2	8	2	48	3	1	1	1	1	1	90	1	1	1	1	1	95
23	20150520	A	2	2	8	2	39	3	1	1	1	2	2	70	1	1	1	1	1	80
24	20150519	A	2	2	8	1	42	3	1	1	1	1	1	.	1	1	1	1	1	.
25	20150519	A	2	1	8	2	33	3	1	1	1	2	2	70	1	1	1	2	1	95
26	20150519	A	2	2	8	2	37	3	1	1	1	1	1	90	1	1	1	1	1	90
27	20150521	A	2	2	8	2	45	5	1	1	1	1	1	95	1	1	1	1	1	100
28	20150519	A	2	2	8	2	42	3	1	1	1	1	1	100	1	1	1	1	1	100
29	20150519	A	2	1	8	2	41	3	1	1	1	2	2	90	1	1	2	1	2	70
30	20150519	A	3	1	9	2	46	4	1	1	1	1	1	80	1	1	1	2	1	90
31	20150521	A	3	2	9	2	37	3	1	1	1	1	1	.	1	1	1	1	1	.
32	20150519	A	3	2	9	2	39	4	1	1	1	1	1	95	1	1	1	1	1	100
33	20150519	A	3	2	9	2	42	3	1	1	1	1	2	85	1	1	1	1	2	85
34	20150520	A	3	1	9	2	39	3	1	1	1	2	2	60	.	.	.	.	.	.
35	20150520	A	3	2	9	1	38	3	1	1	1	1	1	95	1	1	1	1	1	100
36	20150519	A	3	2	9	2	33	4	1	1	1	1	1	95	2	1	1	2	1	95
37	20150519	A	3	1	9	2	42	3	1	1	1	1	1	90	1	1	1	1	1	100
38	20150519	A	3	1	9	2	42	3	1	1	1	1	2	90	1	1	1	2	1	97
39	20150520	A	3	2	9	2	44	3	1	1	1	1	2	80	1	1	1	1	2	90
40	20150520	A	3	1	9	2	33	3	1	1	1	1	1	70	1	1	2	2	1	90
41	20150519	A	3	1	9	2	33	4	1	1	1	1	1	95	1	1	1	1	1	89
42	20150520	A	3	1	9	2	42	.	1	1	1	1	1	80	1	1	1	1	1	100
43	20150521	A	3	1	9	2	45	4	1	1	1	1	1	70	1	1	1	2	1	.
44	20150521	A	3	1	9	2	39	4	1	1	1	1	1	70	1	1	1	1	1	100
45	20150520	A	3	2	9	2	43	3	1	1	1	1	1	90	1	1	1	1	1	100
46	20150519	A	3	2	9	2	41	4	1	1	1	1	1	95	1	1	1	1	1	95
47	20150521	A	3	1	9	1	42	3	1	1	1	1	1	70	1	1	1	1	1	95
48	20150519	A	4	1	10	2	39	4	1	1	1	1	1	70	1	1	1	1	1	100
49	20150519	A	4	1	10	2	64	.	1	1	1	1	1	.	1	1	1	1	1	99
50	20150521	A	4	1	10	1	45	3	1	1	1	1	1	.	1	1	1	1	1	.
51	20150520	A	4	1	10	2	37	4	1	1	1	1	1	85	1	1	1	1	1	90
52	20150519	A	4	2	10	2	38	3	1	1	1	1	1	.	1	1	1	1	1	80
53	20150520	A	4	2	10	2	42	3	1	1	1	1	1	93	1	1	1	1	1	98
54	20150519	A	4	2	10	2	33	3	1	1	1	2	2	70	1	1	1	1	2	95
55	20150521	A	4	1	10	2	48	3	1	1	1	1	1	80	1	1	1	1	1	90
56	20150521	A	4	1	10	2	45	5	1	1	1	1	1	95	1	1	1	1	1	95
57	20150519	A	4	2	10	2	39	4	1	1	1	1	1	100	1	1	1	1	1	100
58	20150519	A	4	1	10	1	37	4	1	1	1	1	1	95	1	1	1	1	1	100
59	20150519	A	4	1	10	2	36	3	1	1	1	1	1	80	1	1	1	1	1	90
60	20150520	A	4	1	10	2	32	3	1	1	1	1	1	100	1	1	1	1	1	95
61	20150520	A	5	1	11	2	41	2	1	1	1	1	1	.	1	1	1	1	1	.
62	20150521	A	5	1	11	2	37	3	1	1	1	1	1	.	1	1	1	1	1	.
63	20150521	A	5	2	11	2	.	.	1	1	1	1	1	100	1	1	1	1	1	100
64	20150519	A	5	1	11	2	31	3	1	1	1	2	1	75	1	1	1	1	1	75
65	20150521	A	5	2	11	2	46	4	1	1	1	1	1	90	1	1	1	1	1	100
66	20150522	A	5	1	11	1	45	5	1	1	1	1	1	.	1	1	1	1	1	.
67	20150521	A	5	2	11	2	45	4	.	1	1	1	2	70	1	1	1	1	2	80
68	20150522	A	5	1	11	1	50	4	1	1	1	3	2	60	1	1	1	1	1	80
69	20150522	A	5	1	11	2	36	3	1	1	1	1	1	100	1	1	1	1	1	100
70	20150519	A	5	2	11	2	34	3	1	1	1	1	1	.	1	1	1	1	1	.
71	20150520	A	5	2	11	1	45	4	1	1	1	2	1	80	1	1	1	1	1	100
72	20150519	A	5	2	10	2	41	4	1	1	1	1	1	95	1	1	1	1	1	95
73	20150519	A	3	1	9	2	70	1	2	1	2	2	1	.	1	1	1	1	1	.
74	20150519	A	4	1	10	2	56	4	1	1	1	3	2	60	1	1	1	1	1	91
75	20150610	B	1	2	7	2	43	3	1	1	1	1	1	80	1	1	1	1	1	100
76	20150609	B	1	1	7	2	36	4	1	1	1	1	1	95	1	1	1	1	1	90
77	20150609	B	1	2	7	2	35	4	1	1	1	1	1	100	1	1	1	1	1	100
78	20150609	B	1	1	7	2	39	3	1	1	1	1	1	100	1	1	1	1	1	100
79	20150609	B	1	1	7	1	36	4	1	1	1	1	1	80	1	1	1	1	1	60
80	20150609	B	1	2	7	2	37	4	1	1	1	1	1	80	1	1	1	1	1	80
81	20150609	B	1	1	7	2	40	4	1	1	1	1	1	90	1	1	1	1	1	91
82	20150609	B	1	2	7	2	34	4	1	1	1	1	1	80	1	1	1	1	1	95
83	20150609	B	1	1	7	2	34	4	1	1	1	1	1	70	1	1	1	1	1	50
84	20150609	B	1	2	7	2	36	3	1	1	1	1	1	85	1	1	1	1	1	100
85	20150609	B	1	1	7	2	37	3	1	1	1	1	1	80	1	1	1	1	1	90
86	20150609	B	1	2	7	2	37	3	1	1	2	3	3	88	1	1	1	1	1	90
87	20150610	B	1	1	7	2	38	4	1	1	1	1	1	90	1	1	1	1	1	100
88	20150610	B	1	1	7	2	34	4	1	1	1	1	1	75	1	1	1	1	1	80
89	20150609	B	1	2	7	2	39	4	1	1	1	2	1	90	1	1	1	1	1	100
90	20150610	B	1	2	7	1	55	4	1	1	1	1	1	90	1	1	1	1	1	100
91	20150609	B	1	1	7	2	46	4	1	1	1	1	1	90	1	1	1	1	1	80
92	20150604	B	1	1	7	1	48	4	1	1	1	1	1	85	1	1	1	1	1	85
93	20150609	B	1	1	7	2	37	3	1	1	1	1	1	90	1	1	1	1	1	90
94	20150610	B	1	1	7	2	39	4	1	1	1	1	1	70	1	1	1	1	1	90
95	20150609	B	1	1	7	1	41	4	1	1	1	1	1	90	1	1	1	1	1	100
96	20150609	B	1	2	7	2	43	4	1	1	1	1	1	95	1	1	1	1	1	100
97	20150610	B	2	1	8	2	43	3	1	1	1	2	1	80	1	1	1	1	1	90
98	20150611	B	2	1	8	2	45	4	1	1	1	1	1	.	1	1	1	1	1	.
99	20150609	B	2	1	8	2	35	4	1	1	1	1	1	80	1	1	1	1	1	90
100	20150609	B	2	1	8	1	37	3	1	1	1	1	1	80	1	1	1	1	1	80
101	20150609	B	2	1	8	2	43	3	1	1	1	1	1	80	1	1	1	1	1	80
102	20150608	B	2	.	8	2	50	4	2	2	2	2	2	60	1	1	1	1	1	100
103	20150609	B	2	2	8	2	36	1	1	1	1	1	1	80	1	1	1	1	1	95
104	20150609	B	2	2	8	2	32	3	1	1	1	1	1	100	1	1	1	1	1	100
105	20150610	B	2	1	8	2	42	4	1	1	1	1	1	80	1	1	1	1	1	95
106	20150609	B	2	1	8	2	33	4	1	1	1	1	1	90	1	1	1	1	1	97
107	20150609	B	2	2	8	2	32	4	1	1	1	1	1	90	1	1	1	1	1	95
108	20150609	B	2	1	8	2	35	3	1	1	1	1	1	100	1	1	1	1	1	100
109	20150609	B	2	1	8	2	43	3	1	1	1	1	1	.	1	1	1	1	1	100
110	20150610	B	2	1	8	2	30	4	1	1	1	2	1	90	1	1	1	2	1	99
111	20150611	B	2	2	8	2	31	3	1	1	1	1	1	90	1	1	1	1	1	90
112	20150611	B	2	1	8	2	34	3	1	1	1	1	1	60	1	1	1	1	1	100
113	20150609	B	2	2	8	2	33	4	1	1	1	1	1	70	1	1	1	1	1	90
114	20150609	B	2	2	8	2	35	4	1	1	1	1	1	90	1	1	1	1	1	90
115	20150610	B	2	2	8	2	34	4	1	1	1	1	1	100	1	1	1	1	1	100
116	.	B	2	1	8	2	38	3	1	1	1	1	1	90	1	1	1	1	1	90
117	20150610	B	2	2	8	2	38	3	1	1	1	1	1	100	1	1	1	1	1	100
118	20150610	B	2	2	8	2	40	3	1	1	1	1	1	100	1	1	1	1	1	80
119	20150610	B	2	1	8	2	36	3	1	1	1	2	1	80	1	1	1	1	1	100
120	20150609	B	3	2	9	2	35	4	1	1	1	1	1	85	1	1	1	1	1	90
121	20150609	B	3	1	9	2	40	4	1	1	1	1	1	90	1	1	1	1	1	100
122	20150610	B	3	2	9	2	35	4	1	1	1	1	2	80	1	1	1	1	1	80
123	20150609	B	3	1	9	2	36	4	1	1	1	1	1	95	1	1	1	1	1	95
124	20150609	B	3	2	9	2	40	3	1	1	1	1	1	90	1	1	1	1	1	95
125	20150610	B	3	1	9	2	35	4	1	1	1	1	1	90	1	1	1	1	1	90
126	20150611	B	3	1	9	2	41	.	1	1	1	1	1	100	1	1	1	1	1	100
127	.	B	3	1	9	1	42	3	1	1	1	1	1	95	1	1	1	1	1	95
128	20150609	B	3	2	9	2	32	3	1	1	1	1	1	100	1	1	1	1	1	100
129	20150609	B	3	2	9	2	40	4	1	1	1	1	1	60	1	1	1	1	1	100
130	.	B	3	1	9	2	34	3	1	1	1	1	1	80	1	1	1	1	1	80
131	20150610	B	3	1	9	2	36	3	1	1	1	1	1	95	1	1	1	1	1	100
132	20150609	B	3	2	9	2	37	3	1	1	1	1	2	100	1	1	1	1	1	100
133	20150610	B	3	1	9	2	38	4	1	1	1	1	1	95	1	1	1	1	1	95
134	20150609	B	3	2	9	1	41	.	1	1	1	1	1	90	1	1	1	1	1	80
135	20150609	B	3	1	9	2	38	4	1	1	1	2	1	95	1	1	1	1	1	98
136	20150609	B	3	1	9	1	44	3	1	1	1	1	1	85	1	1	1	1	1	80
137	20150610	B	3	1	9	1	38	.	1	1	1	1	1	.	1	1	1	1	1	.
138	20150609	B	3	2	9	2	46	2	1	1	1	1	1	100	1	1	1	1	1	100
139	.	B	3	2	9	2	45	4	1	1	1	1	1	90	1	1	1	1	1	80
140	20150609	B	3	2	9	2	39	4	1	1	1	1	1	85	1	1	1	1	1	90
141	20150610	B	3	2	9	2	37	3	1	1	1	1	1	80	1	1	1	1	1	80
142	20150609	B	3	1	9	1	45	4	1	1	1	1	2	90	1	1	1	1	1	100
143	20150609	B	3	1	9	2	39	5	1	1	1	2	1	90	1	1	2	2	2	80
144	.	B	3	1	9	2	39	4	1	1	1	1	1	80	1	1	1	1	1	100
145	20150609	B	3	2	9	2	38	4	1	1	1	1	1	70	1	1	1	1	1	95
146	.	B	3	1	9	2	36	4	1	1	1	1	1	65	1	1	1	1	2	100
147	.	B	4	2	10	2	39	3	1	1	1	1	1	70	1	1	1	1	1	85
148	20150611	B	4	1	10	2	45	4	1	1	1	1	1	80	1	1	1	1	1	95
149	20150610	B	4	2	10	2	38	4	1	1	1	1	1	85	1	1	1	1	2	65
150	20150609	B	4	2	10	2	42	3	1	1	1	2	2	40	2	1	2	2	1	50
151	20150611	B	4	1	10	2	39	3	1	1	1	1	1	90	1	1	1	1	1	80
152	20150609	B	4	2	10	2	39	3	2	1	2	2	1	80	1	1	1	1	1	90
153	20150609	B	4	1	10	2	34	4	1	1	1	2	2	70	1	1	1	2	1	70
154	20150609	B	4	1	10	2	42	3	1	1	1	1	1	90	1	1	2	3	2	75
155	.	B	4	1	10	2	44	4	1	1	1	2	1	70	1	1	1	1	1	95
156	20150610	B	4	1	10	1	41	4	1	1	1	1	1	95	1	1	1	1	1	95
157	20150609	B	4	1	10	2	45	4	1	1	1	2	2	60	1	1	1	1	1	99
158	20150511	B	4	2	10	2	37	4	1	1	1	1	1	2	1	1	1	1	1	98
159	20150609	B	4	.	10	2	40	4	1	1	1	1	1	99	1	1	1	1	1	100
160	20150611	B	4	2	10	2	41	4	1	1	1	1	1	80	1	1	1	1	1	70
161	20150609	B	4	1	10	2	37	4	1	1	1	1	1	85	1	1	1	1	1	100
162	20150610	B	4	1	10	2	38	3	1	1	1	1	1	100	1	1	1	1	1	100
163	20150611	B	4	1	10	1	33	3	1	1	1	1	2	60	1	1	1	1	1	70
164	20150610	B	4	2	10	2	34	.	1	1	1	1	1	50	1	1	1	1	1	50
165	20150610	B	4	2	10	2	38	3	1	1	1	1	1	90	1	1	1	1	1	90
166	20150610	B	4	1	10	2	43	3	1	1	1	1	1	80	1	1	1	1	1	70
167	20150609	B	4	1	10	2	37	3	1	1	1	1	1	.	1	1	1	1	1	80
168	20150609	B	4	2	10	1	38	3	1	1	1	1	1	90	1	1	1	1	1	100
169	20150609	B	5	2	11	2	40	4	1	1	1	1	1	90	1	1	1	1	1	85
170	20150611	B	5	2	11	2	41	.	1	1	1	1	1	100	1	1	1	1	1	90
171	20150609	B	5	2	11	2	34	4	1	1	1	1	1	95	1	1	1	1	1	95
172	20150609	B	5	1	11	1	46	4	1	1	1	1	1	80	2	2	2	2	2	70
173	20150611	B	5	1	11	2	47	3	1	1	1	1	1	80	1	1	1	2	1	90
174	20150607	B	5	2	11	2	39	3	1	1	1	1	1	100	2	1	1	1	1	95
175	20150610	B	5	1	11	1	42	4	1	1	1	1	1	100	1	1	1	1	1	100
176	.	B	5	2	11	2	35	4	1	1	1	1	1	89	1	1	1	1	2	80
177	.	B	5	1	11	2	39	4	1	1	1	1	1	50	1	1	1	2	1	80
178	.	B	5	1	11	2	37	4	1	1	1	1	1	100	1	1	1	1	1	100
179	20150609	B	5	2	11	2	36	3	1	1	1	1	2	80	1	1	1	1	1	90
180	20150610	B	5	2	11	2	40	3	1	1	1	1	1	90	1	1	1	1	1	100
181	20150609	B	5	2	11	1	51	2	1	1	1	1	1	100	1	1	1	1	1	100
182	20150610	B	5	2	11	2	42	4	1	1	1	1	1	100	2	1	1	2	2	50
183	20150611	B	5	1	11	2	47	3	1	1	1	2	1	70	1	1	1	2	1	70
184	20150609	B	5	2	11	2	45	4	1	1	1	2	2	70	1	1	1	2	1	50
185	20150610	B	5	2	10	2	45	4	1	1	1	2	2	60	1	1	1	2	1	55
186	20150609	B	5	2	11	2	45	3	1	1	1	1	1	80	1	1	1	1	1	.
187	20150609	B	5	1	11	2	41	4	1	1	1	1	1	90	1	1	1	1	1	100
188	20150610	B	5	1	11	2	39	4	1	1	1	1	1	80	1	1	1	1	1	90
189	20150610	B	5	2	11	2	47	3	1	1	1	1	1	80	1	1	1	1	1	100
190	20150610	B	5	1	11	1	42	4	1	1	1	1	1	90	1	1	1	1	1	90
191	20150610	B	6	1	12	2	47	3	1	1	1	1	1	80	1	1	1	1	1	100
192	20150610	B	6	1	12	2	39	4	1	1	1	1	1	80	1	1	1	1	1	35
193	20150610	B	6	1	12	2	40	3	1	1	2	1	1	80	1	1	1	1	1	70
194	20150609	B	6	2	12	2	42	3	1	1	1	2	2	40	1	2	1	2	1	50
195	20150610	B	6	2	12	2	35	4	1	1	1	1	1	90	1	1	1	2	1	80
196	20150611	B	6	1	12	2	39	3	1	1	1	1	1	90	1	1	1	1	1	90
197	20150609	B	6	2	12	1	46	3	2	1	2	2	1	68	1	1	1	1	1	70
198	20150610	B	6	2	12	2	45	4	1	1	1	1	1	80	1	1	1	2	1	50
199	20150610	B	6	1	12	2	48	3	1	1	1	1	1	95	1	1	1	1	1	100
200	20150609	B	6	1	12	2	50	3	1	1	1	1	2	90	1	1	1	1	1	98
201	20150610	B	6	2	12	2	40	3	1	1	1	1	1	90	1	1	1	1	1	90
202	20150611	B	6	2	12	2	45	4	1	1	1	1	1	90	1	1	1	1	2	90
203	20150610	B	6	1	12	2	43	3	1	1	1	1	1	50	1	1	1	1	1	.
204	20150609	B	6	1	12	2	44	4	1	1	1	1	1	70	1	1	1	1	1	100
205	20150611	B	6	2	12	2	44	4	1	1	1	1	1	95	1	1	1	1	1	95
206	20150610	B	6	2	12	2	39	4	1	1	1	1	1	85	1	1	1	1	1	99
207	20150610	B	6	1	12	1	42	3	1	1	1	1	1	70	1	1	2	1	2	40
208	20150610	B	6	1	12	2	38	3	1	1	1	1	1	100	1	1	1	1	1	80
209	20150611	B	6	1	12	2	39	4	1	1	1	1	1	95	1	1	1	2	1	65
210	20150609	B	6	.	12	2	42	4	1	1	1	2	1	40	2	1	2	2	2	50
211	20150609	B	6	2	12	2	36	3	1	1	1	1	1	95	1	1	1	1	1	45
212	20150609	B	6	2	12	2	40	4	1	1	1	2	1	60	1	1	1	1	1	85
213	20150610	B	6	2	12	1	49	4	1	1	1	2	1	80	1	1	1	1	1	95
214	20150610	B	6	1	12	1	41	4	1	1	1	1	1	95	1	1	1	1	1	95
215	20150609	B	6	2	12	2	42	3	1	1	2	2	1	90	1	1	1	1	1	88
216	20150609	B	6	1	12	2	42	3	1	1	2	2	1	90	1	1	1	1	1	.
217	20150609	B	6	.	12	2	40	4	1	1	1	1	1	85	1	1	1	2	2	90
218	20150609	B	6	2	12	2	50	3	2	1	2	2	2	70	1	1	1	1	1	85
219	20150610	B	6	2	12	2	42	4	1	1	1	1	1	100	1	1	1	1	1	100
220	20150610	B	6	2	12	2	42	3	1	1	1	1	1	90	1	1	1	1	1	.
221	20150609	B	6	1	12	1	45	4	1	1	1	1	2	90	1	1	1	1	1	100
222	20150609	B	6	1	12	2	40	3	1	1	1	1	1	90	1	1	1	1	1	90
223	20150529	C	1	1	7	2	35	3	1	1	1	1	1	75	1	1	1	1	1	80
224	20150601	C	1	1	7	1	43	3	1	1	1	1	1	100	1	1	1	1	3	100
225	20150531	C	1	1	7	2	43	4	1	1	1	2	1	90	1	1	1	1	1	100
226	20150529	C	1	1	7	2	40	4	1	1	1	1	1	80	1	1	1	1	1	100
227	20150531	C	1	2	7	2	30	4	1	1	1	1	1	90	1	1	1	1	1	100
228	20150603	C	1	1	7	2	34	4	1	1	1	1	1	95	1	1	1	1	1	100
229	20150522	C	1	1	7	2	37	3	1	1	1	2	1	80	1	1	2	1	1	100
230	20150529	C	1	1	7	2	33	4	1	1	1	1	1	90	1	1	1	1	1	100
231	20150601	C	1	1	7	2	32	4	1	1	1	2	1	70	1	1	1	1	1	95
232	20150601	C	1	2	7	2	34	3	1	1	1	1	1	100	1	1	1	1	1	100
233	20150529	C	1	2	7	2	36	3	1	1	1	1	1	90	1	1	1	1	1	100
234	20150530	C	1	1	7	2	36	4	1	1	1	1	1	90	1	1	1	1	1	75
235	20150530	C	1	2	7	1	47	4	1	1	1	1	1	90	1	1	1	1	1	90
236	20150602	C	1	2	7	1	50	3	2	1	2	2	1	90	1	1	1	1	1	95
237	20150603	C	1	2	7	2	47	3	1	1	1	1	2	90	1	2	1	1	1	95
238	20150530	C	1	1	7	2	36	3	1	1	1	1	1	70	1	1	1	1	1	90
239	20150530	C	1	2	7	2	36	4	1	1	1	1	1	95	1	1	1	1	1	95
240	20150530	C	1	2	7	.	.	.	.	.	.	.	.	.	1	1	1	1	1	100
241	20150530	C	1	2	7	2	37	3	1	1	1	1	1	100	1	1	1	1	1	100
242	20150530	C	1	2	7	2	39	4	1	1	1	1	1	70	1	1	1	1	1	100
243	20150531	C	1	1	7	2	34	3	1	1	1	1	1	80	1	1	1	1	1	90
244	20150529	C	1	1	7	2	38	4	1	1	1	2	1	70	1	1	1	1	2	80
245	20150602	C	1	1	7	2	40	4	1	1	1	1	1	90	1	1	1	1	1	90
246	20150531	C	1	2	7	2	42	3	1	1	1	1	1	85	1	1	1	1	1	90
247	20150529	C	1	2	7	2	37	4	1	1	1	1	1	90	1	1	1	1	1	100
248	20150530	C	1	1	7	2	36	4	1	1	1	1	1	80	1	1	1	1	1	100
249	20150530	C	1	2	7	1	46	4	1	1	1	2	1	70	1	1	1	1	1	90
250	20150601	C	1	2	7	2	37	4	1	1	1	1	1	95	1	1	1	1	1	95
251	20150531	C	1	.	8	1	34	3	1	1	1	1	1	90	1	1	1	1	1	100
252	20150601	C	1	1	7	2	35	3	1	1	1	1	1	80	1	1	1	1	1	100
253	20150601	C	1	2	7	2	34	4	1	1	2	3	2	80	1	1	1	1	1	100
254	20150531	C	1	1	7	1	53	3	1	1	1	2	2	.	1	1	1	1	1	90
255	20150601	C	1	2	7	2	34	4	1	1	2	3	2	80	1	1	1	1	1	90
256	20150531	C	1	2	7	2	36	4	1	1	1	1	1	90	1	1	1	1	1	100
257	20150530	C	1	1	7	2	38	4	1	1	1	1	1	95	1	1	1	1	1	90
258	20150601	C	1	1	7	1	34	3	1	1	1	1	1	100	1	1	1	1	1	100
259	20150529	C	1	2	7	2	34	4	1	1	1	1	1	100	1	1	1	1	1	90
260	20150529	C	1	1	7	2	40	3	1	1	1	1	1	100	1	1	1	1	1	100
261	20150604	C	1	.	7	2	39	3	1	1	1	1	1	88	1	1	1	1	1	90
262	20150529	C	1	.	7	2	31	3	1	1	1	1	1	100	1	1	1	1	1	100
263	20150529	C	1	2	7	2	39	3	1	1	1	1	1	95	1	1	1	1	1	100
264	20150531	C	1	2	7	2	33	3	1	1	1	1	1	80	1	1	1	1	1	100
265	20150529	C	1	2	7	2	45	4	1	1	1	1	1	95	1	1	1	1	1	70
266	20150531	C	1	1	7	2	35	3	1	1	1	1	1	90	1	1	1	1	1	100
267	20150531	C	1	2	7	2	38	2	2	1	1	2	2	50	1	1	1	1	1	90
268	20150531	C	1	1	7	2	37	3	1	1	1	1	1	.	1	1	1	1	1	.
269	20150601	C	1	1	7	2	34	4	1	1	1	2	1	70	1	1	1	1	1	70
270	20150601	C	1	1	7	1	38	5	1	1	1	1	1	95	1	1	1	1	1	90
271	20150601	C	1	1	7	1	41	4	1	1	1	1	1	80	1	1	1	1	1	90
272	20150531	C	1	1	7	2	35	4	1	1	1	2	1	90	1	1	1	1	1	80
273	20150531	C	1	1	7	1	41	3	1	1	1	1	1	95	1	1	1	1	1	100
274	20150601	C	1	.	7	2	34	3	1	1	1	1	1	.	1	1	1	1	1	80
275	20150529	C	1	2	7	2	43	4	1	1	2	2	2	80	1	1	1	1	1	100
276	20150529	C	1	2	7	2	34	4	1	1	1	1	2	95	1	1	1	1	1	100
277	20150604	C	1	2	7	1	46	3	1	1	1	1	1	70	1	1	1	1	1	70
278	20150531	C	1	1	7	2	32	3	1	1	1	1	1	95	1	1	1	1	1	100
279	20150529	C	1	1	7	2	29	3	1	1	1	1	1	100	1	1	1	1	1	100
280	20150530	C	1	2	7	2	46	4	1	1	1	1	1	.	1	1	1	1	1	.
281	20150531	C	1	2	7	2	30	3	1	1	1	1	1	100	1	1	1	1	1	100
282	20150531	C	1	1	7	2	37	4	1	1	1	1	1	80	1	1	1	1	1	60
283	20150530	C	1	2	7	2	36	4	1	1	1	1	1	80	1	1	1	2	2	90
284	20150529	C	1	2	7	2	35	4	1	1	1	1	1	80	1	1	1	1	1	90
285	20150531	C	1	2	7	2	38	4	1	1	1	2	2	80	1	1	1	1	1	90
286	20150530	C	1	2	7	2	32	3	1	1	1	1	1	90	1	1	1	1	1	.
287	20150530	C	1	2	7	2	34	4	1	1	1	1	1	95	1	1	1	1	1	90
288	20150530	C	1	1	7	2	29	3	1	1	1	1	3	80	1	1	1	1	1	100
289	20150530	C	1	1	7	2	.	4	1	1	1	2	2	70	1	1	1	1	1	70
290	20150531	C	1	2	7	2	33	4	1	1	1	1	1	80	1	1	1	1	1	80
291	20150530	C	1	2	7	2	46	3	1	1	1	1	1	95	1	1	1	1	1	95
292	20150531	C	1	1	7	2	38	4	1	1	1	1	1	90	1	2	1	1	1	100
293	20150530	C	1	2	7	2	45	2	1	1	1	2	2	95	1	1	1	1	1	90
294	20150531	C	1	2	7	2	40	3	1	1	1	1	1	80	1	1	1	1	1	90
295	20150529	C	1	1	7	2	36	4	1	1	1	1	1	80	1	1	1	2	1	90
296	20150531	C	1	1	7	2	41	4	1	1	1	1	1	95	1	1	1	1	1	100
297	20150530	C	1	1	7	2	35	3	1	1	1	1	1	80	1	1	1	1	1	100
298	20150530	C	1	1	7	2	35	4	1	1	1	1	1	95	1	1	1	1	1	85
299	20150530	C	1	1	7	2	35	3	1	1	1	1	1	95	1	1	1	1	1	100
300	20150602	C	1	1	7	1	38	3	1	1	1	1	1	80	1	1	1	1	1	80
301	.	C	1	1	7	2	40	4	1	1	1	1	1	90	1	1	1	1	1	100
302	.	C	1	2	7	1	43	4	1	1	1	1	1	100	1	1	1	2	1	100
303	20150530	C	2	2	8	2	34	4	1	1	1	1	1	95	1	1	1	1	1	100
304	20150529	C	2	2	8	2	39	4	1	1	1	1	1	85	1	1	1	1	1	100
305	20150531	C	2	1	8	1	38	3	1	1	1	1	1	100	1	1	1	1	1	100
306	20150530	C	2	1	8	2	44	4	1	1	1	1	1	100	1	1	1	1	1	90
307	20150601	C	2	1	8	2	30	4	1	1	1	1	1	90	1	1	1	1	1	90
308	20150531	C	2	2	8	2	34	4	1	1	1	1	1	100	1	1	1	1	1	100
309	.	C	2	2	8	2	31	3	1	1	1	1	1	.	1	1	1	1	1	95
310	20150529	C	2	2	8	2	39	4	1	1	1	1	1	99	1	1	1	1	1	100
311	20150531	C	2	2	8	2	40	4	1	1	1	1	1	90	1	1	1	1	1	95
312	20150531	C	2	2	8	2	44	3	1	1	1	1	1	80	1	1	1	2	2	100
313	20150531	C	2	1	8	2	40	4	1	1	1	1	1	90	1	1	1	1	1	80
314	20150531	C	2	2	8	1	43	3	1	1	1	1	1	100	1	1	1	1	3	100
315	20150529	C	2	1	8	2	43	4	1	1	2	2	2	90	1	1	1	1	1	95
316	20150531	C	2	2	8	2	40	4	1	1	1	1	1	95	1	1	1	1	1	100
317	20150529	C	2	2	8	2	32	4	1	1	2	2	1	70	1	1	1	1	1	90
318	20150530	C	2	2	8	2	34	4	1	1	1	2	1	100	1	1	1	1	1	100
319	20150531	C	2	1	8	2	35	3	1	1	1	1	1	90	1	1	1	1	1	.
320	.	C	2	2	8	2	39	4	1	1	1	1	1	80	1	1	1	1	2	100
321	20150531	C	2	2	8	2	41	3	1	1	1	1	1	95	1	1	1	1	1	100
322	20150529	C	2	1	8	1	42	4	1	1	1	2	1	85	1	1	1	1	1	95
323	20150529	C	2	1	8	2	35	4	1	1	1	2	1	90	1	1	1	1	1	100
324	20150529	C	2	1	8	1	38	4	1	1	1	1	1	80	1	1	2	1	1	80
325	20150531	C	2	2	8	2	34	4	1	1	1	1	1	100	1	1	1	1	1	99
326	20150531	C	2	1	8	2	40	4	1	1	1	1	1	100	1	1	1	1	1	100
327	20150530	C	2	2	8	2	45	2	1	1	1	1	1	90	1	1	1	1	1	90
328	20150602	C	2	1	8	2	40	3	1	1	1	1	1	93	1	1	1	1	1	90
329	20150531	C	2	2	8	2	43	4	1	1	1	1	1	.	1	1	1	1	1	100
330	20150601	C	2	1	8	2	32	3	1	1	1	1	1	.	1	1	1	1	1	90
331	20150601	C	2	1	8	2	35	4	1	1	1	1	1	100	1	1	1	1	1	100
332	20150601	C	2	2	8	2	38	4	1	1	1	1	2	95	1	1	1	1	2	95
333	20150529	C	2	1	8	2	38	3	1	1	1	1	1	95	1	1	1	1	1	95
334	20150601	C	2	2	8	2	42	4	1	1	1	1	1	75	1	1	1	1	1	75
335	.	C	2	2	8	2	39	3	1	1	1	2	1	100	1	1	1	1	2	80
336	20150531	C	2	2	8	1	37	4	1	1	1	2	1	90	1	1	1	1	1	100
337	20150530	C	2	2	8	2	36	4	1	1	1	1	1	80	1	1	1	1	1	100
338	20150531	C	2	1	8	2	33	4	1	1	1	1	1	90	2	1	1	1	1	90
339	20150529	C	2	2	8	2	40	4	1	1	1	1	1	80	1	1	1	1	1	100
340	20150529	C	2	1	8	2	29	4	1	1	1	1	1	70	1	1	1	1	1	100
341	20150531	C	2	1	8	2	51	5	1	1	1	1	1	.	1	1	1	1	1	100
342	20150531	C	2	2	8	2	36	4	1	1	1	1	1	76	1	1	1	1	1	90
343	20150531	C	2	1	8	2	28	3	1	1	1	1	1	100	1	1	1	1	1	100
344	.	C	2	2	8	2	41	4	1	1	1	1	1	70	1	1	1	1	1	85
345	20150531	C	2	2	8	2	35	4	1	1	1	2	1	90	1	1	1	1	1	80
346	20150531	C	2	1	8	2	36	4	1	1	1	1	1	90	1	1	1	1	1	90
347	20150530	C	2	1	8	2	35	3	1	1	1	1	1	90	1	1	1	1	1	100
348	20150529	C	2	1	8	2	42	4	1	1	1	1	1	70	1	1	1	1	1	90
349	20150529	C	2	1	8	2	42	4	1	1	1	1	1	70	1	1	1	1	1	100
350	20150601	C	2	2	8	2	40	3	1	1	1	1	1	100	1	1	1	1	1	100
351	20150530	C	2	1	8	2	38	3	1	1	1	2	2	80	1	1	1	1	1	80
352	20150531	C	2	2	8	1	48	3	1	1	1	1	1	70	1	1	1	1	1	95
353	20150530	C	2	1	8	2	36	4	1	1	1	1	1	100	1	1	1	1	1	100
354	.	C	2	2	8	2	39	3	1	1	1	1	2	95	1	1	1	1	1	90
355	20150531	C	2	2	8	2	39	4	1	1	1	1	1	90	1	1	1	2	1	60
356	20150531	C	2	1	8	2	38	3	1	1	1	1	1	100	1	1	1	1	1	100
357	20150530	C	2	2	8	2	38	.	1	1	1	1	1	90	1	1	1	1	1	95
358	20150530	C	2	1	8	2	32	3	1	1	1	1	1	.	1	1	1	1	1	.
359	20150528	C	2	1	8	2	40	4	1	1	1	1	1	95	1	1	1	1	2	100
360	20150531	C	2	2	8	2	32	4	1	1	1	1	1	95	1	1	1	1	1	100
361	20150531	C	2	1	8	1	53	2	1	1	1	1	1	95	1	1	1	1	1	85
362	20150531	C	2	1	8	1	53	2	1	1	1	1	1	95	1	1	1	1	1	95
363	.	C	2	2	8	2	39	.	1	1	1	1	2	.	1	1	1	1	1	.
364	20150531	C	2	1	8	2	41	3	1	1	1	2	2	65	1	1	2	1	2	70
365	20150529	C	2	2	8	2	38	3	1	1	1	1	1	60	1	1	1	1	1	100
366	.	C	2	1	8	2	34	3	1	1	1	1	1	85	1	1	1	1	1	90
367	20150529	C	2	2	8	2	35	3	1	1	1	1	2	80	2	1	1	1	1	50
368	20150530	C	2	2	8	2	35	4	1	1	1	1	1	95	1	1	1	1	1	95
369	20150530	C	2	2	8	2	38	3	1	1	1	1	1	80	1	1	1	1	1	100
370	20150530	C	2	1	8	1	47	4	1	1	1	1	1	95	1	1	1	1	1	95
371	20150602	C	2	2	8	2	40	3	1	1	1	1	1	95	1	1	1	1	1	95
372	20150530	C	2	2	8	2	38	4	1	1	1	1	1	98	1	1	1	1	1	.
373	.	C	3	1	9	1	46	4	1	1	1	1	1	80	1	1	1	1	1	80
374	20150531	C	3	2	9	2	38	4	1	1	1	1	1	90	1	1	1	1	1	100
375	20150531	C	3	1	9	2	35	4	1	1	1	1	1	80	1	1	1	1	.	.
376	20150530	C	3	2	9	2	40	4	1	1	1	1	1	95	1	1	1	1	1	90
377	20150531	C	3	2	9	2	38	5	2	1	2	2	1	70	1	1	1	1	1	100
378	20150601	C	3	2	9	2	42	3	1	1	1	1	1	100	1	1	1	1	1	100
379	20150531	C	3	2	9	2	36	4	1	1	1	1	1	70	1	1	1	1	1	90
380	20150531	C	3	1	9	2	33	4	1	1	1	1	1	80	1	1	1	1	1	100
381	20150601	C	3	1	9	2	34	4	1	1	1	1	1	95	1	1	1	2	1	90
382	20150601	C	3	1	9	2	40	3	1	1	2	2	1	60	1	1	1	1	2	80
383	20150529	C	3	1	9	2	36	3	1	1	1	1	1	90	1	1	1	2	1	80
384	20150531	C	3	2	9	2	41	4	1	1	1	1	1	95	1	1	1	1	1	100
385	20150529	C	3	2	9	2	47	3	1	1	1	1	1	74	1	1	1	1	2	80
386	20150531	C	3	1	9	2	40	3	1	1	1	1	2	70	1	1	1	1	1	100
387	20150530	C	3	2	9	2	33	4	1	1	1	1	1	95	1	1	1	1	1	90
388	20150531	C	3	1	9	2	34	3	1	1	1	1	1	80	1	1	1	1	1	100
389	20150529	C	3	2	9	2	36	4	1	1	1	1	1	100	1	1	1	1	1	100
390	20150602	C	3	2	9	1	49	2	1	1	1	1	1	.	1	1	1	1	1	.
391	20150530	C	3	1	9	2	43	3	1	1	1	1	1	100	1	1	1	1	1	100
392	20150531	C	3	1	9	2	43	4	1	1	1	2	1	90	1	1	1	1	2	95
393	20150530	C	3	2	9	2	39	4	1	1	1	1	1	90	1	1	1	1	1	90
394	20150531	C	3	2	9	2	42	4	1	1	1	2	2	65	1	1	1	1	1	90
395	20150529	C	3	2	9	1	41	4	1	1	1	1	1	100	1	1	1	1	1	100
396	20150530	C	3	2	9	2	38	4	1	1	1	1	1	80	1	1	1	1	1	90
397	.	C	3	1	9	2	40	4	1	1	1	1	1	100	1	1	1	1	1	100
398	20150531	C	3	2	9	2	35	3	1	1	1	1	1	90	1	1	1	1	1	100
399	20150602	C	3	1	9	1	.	.	1	1	1	2	1	.	1	1	2	1	2	.
400	20150530	C	3	1	9	1	45	4	1	1	1	2	1	90	1	1	1	2	1	80
401	20150601	C	3	1	9	2	49	3	1	1	1	1	1	70	1	1	1	1	1	75
402	20150601	C	3	2	9	2	.	.	1	1	1	1	1	50	1	1	1	1	1	100
403	20150510	C	3	2	9	2	45	.	1	1	1	1	1	100	1	1	1	1	1	100
404	20150530	C	3	1	9	2	40	4	1	1	1	2	2	70	1	1	1	1	2	70
405	20150531	C	3	1	9	2	30	3	1	1	1	1	1	100	1	1	1	1	1	100
406	20150530	C	3	1	9	2	37	3	1	1	1	1	1	60	1	1	1	1	1	90
407	20150531	C	3	2	9	2	35	4	1	1	1	1	1	100	1	1	1	1	1	100
408	.	C	3	.	9	1	38	4	1	1	1	1	1	100	1	1	1	2	1	100
409	20150601	C	3	2	9	1	46	2	1	1	1	1	1	70	1	1	1	1	1	70
410	20150601	C	3	1	9	2	35	4	1	1	1	1	1	80	1	1	1	1	1	95
411	.	C	3	2	9	2	39	3	1	1	1	1	2	95	1	1	1	1	2	95
412	20150531	C	3	2	9	1	40	3	1	1	1	1	1	85	1	1	1	1	1	85
413	20150602	C	3	2	9	2	37	4	1	1	1	1	1	80	1	1	1	1	1	90
414	20150601	C	3	1	9	1	38	.	1	1	1	1	1	90	1	1	1	2	2	70
415	20150530	C	3	1	9	2	42	4	1	1	1	1	1	95	1	1	1	1	1	80
416	20150531	C	3	2	9	2	44	4	1	1	1	2	2	50	1	1	1	1	1	98
417	20150531	C	3	1	9	2	44	4	1	1	1	1	1	80	1	1	2	1	1	90
418	20150602	C	3	2	9	2	41	4	1	1	1	2	1	50	1	1	1	1	2	70
419	20150531	C	3	1	9	2	32	3	1	1	1	1	1	80	1	1	1	1	1	90
420	.	C	3	1	9	2	43	3	1	1	1	1	1	95	1	1	1	1	2	70
421	20150602	C	3	1	9	1	46	3	1	1	1	1	1	.	1	1	1	1	1	.
422	20150530	C	3	2	9	2	38	4	1	1	1	1	1	90	1	1	1	1	1	80
423	20150530	C	3	2	9	2	38	4	1	1	1	1	1	95	1	1	1	1	1	95
424	20150531	C	3	1	8	2	40	5	1	1	1	1	1	90	1	1	1	1	1	100
425	20150529	C	3	2	9	2	36	4	1	1	1	1	1	80	1	1	1	1	1	95
426	.	C	3	1	9	1	43	4	1	1	1	1	1	.	1	1	1	1	1	.
427	20150529	C	3	.	9	2	32	3	1	1	2	1	2	80	1	1	1	1	1	90
428	20150530	C	3	1	9	2	34	4	1	1	1	1	1	90	1	1	1	1	1	100
429	20150530	C	3	2	9	2	33	4	1	1	1	1	1	100	1	1	1	1	1	100
430	20150531	C	3	1	9	2	40	3	1	1	1	1	1	90	1	1	1	1	1	95
431	20150529	C	3	2	9	1	42	4	1	1	1	1	1	85	1	1	1	1	1	100
432	20150529	C	3	2	9	2	44	3	1	1	1	2	1	90	1	1	1	1	1	80
433	20150603	C	3	1	9	2	44	3	1	1	1	1	1	100	1	1	1	1	1	100
434	20150601	C	3	1	9	2	38	.	1	1	1	1	1	100	1	1	1	1	1	100
435	20150530	C	3	2	9	2	40	4	1	1	1	1	1	90	1	1	1	1	1	.
436	20150602	C	3	2	9	1	34	3	1	1	1	1	1	90	1	1	1	1	1	90
437	20150531	C	3	1	9	1	33	3	1	1	1	1	1	80	1	1	1	1	1	80
438	20150531	C	3	1	9	2	47	3	1	1	1	2	1	70	1	2	2	2	2	90
439	20150530	C	3	1	9	2	29	3	1	1	1	1	3	80	1	1	1	1	1	100
440	20150531	C	3	2	9	2	.	4	1	1	1	1	1	95	1	1	1	1	1	70
441	.	C	3	2	9	1	34	4	1	1	1	2	1	95	1	1	1	1	1	100
442	20150601	C	3	1	9	1	50	3	2	1	2	2	1	80	1	1	1	1	1	95
443	.	C	3	1	9	2	37	4	1	1	1	2	2	90	1	1	1	1	2	90
444	20150531	C	3	1	9	1	47	3	1	1	1	1	1	74	1	1	1	1	1	85
445	20150531	C	3	2	9	1	43	4	1	1	1	1	1	95	1	1	1	1	1	80
446	20150602	C	3	1	9	2	41	4	1	1	1	1	2	50	1	1	1	1	2	70
447	.	C	3	2	9	2	43	3	1	1	1	1	1	.	1	1	1	1	1	90
448	.	C	3	1	9	2	38	3	1	1	1	1	1	100	1	1	1	1	1	.
449	.	C	3	2	9	2	37	3	1	1	1	2	1	85	1	1	1	1	1	95
450	.	C	3	.	9	2	43	3	1	1	1	1	1	100	1	1	1	1	1	.
451	20150529	C	4	2	10	2	32	4	1	1	1	2	1	80	1	1	1	1	2	80
452	20150531	C	4	2	10	2	39	4	1	1	1	1	1	90	1	1	1	1	1	85
453	20150529	C	4	1	10	1	38	3	1	1	1	2	2	30	1	1	1	1	1	95
454	20150530	C	4	1	10	2	36	4	1	1	1	1	1	100	1	1	1	1	1	100
455	20150531	C	4	1	10	2	38	3	1	1	1	1	1	80	1	1	1	1	1	80
456	20150528	C	4	1	10	2	33	3	1	1	1	1	1	80	1	1	1	1	1	90
457	20150529	C	4	1	10	2	34	3	1	1	1	1	1	60	1	1	1	2	2	80
458	20150529	C	4	2	10	1	50	3	1	1	1	1	1	100	1	1	1	1	1	60
459	20150531	C	4	1	10	2	42	3	1	1	1	1	1	90	1	1	1	1	1	90
460	20150530	C	4	1	10	2	40	4	1	1	1	1	1	90	2	1	1	2	1	85
461	20150601	C	4	1	10	1	37	4	1	1	1	1	1	79	1	1	1	1	1	88
462	20150601	C	4	1	10	2	42	4	1	1	1	1	1	100	1	1	1	1	1	100
463	20150601	C	4	.	11	2	46	3	1	1	1	1	1	90	1	2	2	2	1	80
464	20150531	C	4	1	10	2	43	4	1	1	1	1	1	100	1	1	1	1	1	100
465	20150601	C	4	1	10	1	50	4	1	1	1	1	1	90	1	1	1	1	1	75
466	20150531	C	4	2	10	2	40	3	1	1	1	1	1	80	1	1	1	1	1	90
467	20150529	C	4	2	10	2	39	4	1	1	1	1	1	99	1	1	1	1	1	100
468	20150601	C	4	1	10	1	43	.	1	1	1	2	1	88	1	1	1	1	1	77
469	.	C	4	1	10	2	37	3	3	1	1	1	2	70	1	1	1	1	2	.
470	20150531	C	4	2	10	2	41	3	1	1	1	1	1	100	1	1	1	1	1	100
471	20150531	C	4	1	10	2	41	3	1	1	1	1	1	100	1	1	1	1	1	.
472	20150531	C	4	2	10	2	35	4	1	1	1	1	1	70	1	1	1	1	1	70
473	20150531	C	4	2	10	2	.	4	1	1	1	1	2	80	1	1	1	1	1	90
474	20150530	C	4	2	10	2	38	3	1	1	1	1	1	100	1	1	1	2	2	100
475	20150531	C	4	2	10	2	52	3	1	1	1	2	1	95	1	1	1	1	1	100
476	20150530	C	4	2	10	2	36	4	1	1	1	1	1	80	1	1	1	1	2	85
477	.	C	4	2	10	2	39	3	1	1	1	2	2	70	1	1	1	1	2	90
478	20150522	C	4	2	10	2	37	3	1	1	1	2	1	80	1	1	1	1	1	100
479	.	C	4	1	10	2	39	4	1	1	1	1	1	80	1	1	1	1	2	95
480	20150601	C	4	1	10	2	40	4	1	1	1	1	1	70	1	1	1	1	1	90
481	20150531	C	4	2	10	2	37	3	1	1	1	1	1	.	1	1	1	1	1	.
482	20150530	C	4	2	10	2	40	5	1	1	1	3	2	60	1	1	1	1	1	90
483	20150530	C	4	1	10	2	48	3	1	1	1	1	2	80	1	1	1	1	1	95
484	20150601	C	4	1	10	2	34	4	1	1	2	3	2	80	1	1	1	1	1	98
485	20150601	C	4	2	10	2	38	3	1	1	1	1	1	.	1	1	1	1	1	.
486	20150531	C	4	1	10	2	40	4	1	1	1	1	1	95	1	1	1	1	1	95
487	20150601	C	4	1	10	2	40	4	1	1	1	1	1	100	1	1	1	1	1	100
488	20150602	C	4	1	10	2	42	3	1	1	1	1	1	60	1	1	1	1	1	80
489	20150601	C	4	1	10	2	37	3	1	1	1	1	1	70	1	1	1	1	1	80
490	.	C	4	1	10	1	40	3	1	1	1	1	1	85	1	1	1	1	1	90
491	20150602	C	4	1	10	2	41	4	1	1	1	1	1	80	1	1	1	1	1	100
492	20150601	C	4	1	10	1	42	4	1	1	1	1	2	80	1	1	1	1	1	75
493	20150601	C	4	2	10	2	32	3	1	1	1	1	1	90	1	1	1	1	1	90
494	20150531	C	4	1	10	1	41	3	2	1	2	3	1	80	1	1	1	1	1	95
495	.	C	4	1	10	1	49	4	1	1	1	1	1	90	1	1	2	1	1	85
496	20150601	C	4	2	10	2	34	4	1	1	1	1	1	90	1	1	1	1	1	100
497	20150601	C	4	1	10	2	44	4	1	1	1	1	1	80	1	1	1	1	1	100
498	20150602	C	4	1	10	2	47	3	1	1	1	1	1	100	1	1	1	1	1	100
499	20150601	C	4	1	10	1	53	2	1	1	1	1	1	95	1	1	1	1	1	65
500	20150601	C	4	1	10	1	50	3	1	1	1	1	1	95	1	1	1	1	1	95
501	20150602	C	4	2	10	2	41	4	1	1	1	1	1	90	1	1	1	1	1	90
502	20150601	C	4	2	10	2	36	4	1	1	1	1	1	100	1	1	1	1	1	100
503	.	C	4	1	10	1	41	4	1	1	1	1	1	95	1	1	1	1	2	90
504	20150603	C	4	2	10	2	.	2	1	1	1	1	1	.	1	1	1	1	1	.
505	20150601	C	4	1	10	2	40	4	1	1	1	1	1	90	1	1	1	1	1	90
506	20150601	C	4	2	10	1	38	5	1	1	1	1	1	95	1	1	1	1	1	95
507	20150601	C	4	2	10	2	41	3	1	1	1	2	1	100	1	1	1	1	1	100
508	.	C	4	1	10	2	37	4	1	1	1	1	1	100	1	1	1	1	1	100
509	20150602	C	4	1	10	2	39	4	1	1	1	1	1	60	1	1	1	1	1	80
510	20150601	C	4	2	10	2	44	3	1	1	1	2	1	50	1	1	1	1	1	90
511	.	C	4	1	10	2	38	4	1	1	1	1	1	98	1	1	1	1	1	98
512	20150601	C	5	1	11	2	40	4	1	1	1	1	1	100	1	1	1	1	1	100
513	20150529	C	5	1	11	2	40	3	1	1	1	1	1	80	1	1	1	1	1	90
514	20150601	C	5	2	11	2	34	4	1	1	1	1	1	90	1	1	1	1	1	50
515	20150531	C	5	1	11	1	43	3	1	1	1	1	1	100	1	1	1	1	3	100
516	20150530	C	5	2	11	2	38	3	1	1	1	2	1	70	1	1	1	2	1	92
517	20150601	C	5	1	11	2	40	4	1	1	1	1	1	70	1	1	1	1	1	.
518	20150602	C	5	.	11	2	48	4	1	1	1	1	1	90	1	1	1	1	1	90
519	20150531	C	5	2	11	2	41	3	1	1	2	2	2	65	1	1	1	2	1	85
520	20150602	C	5	2	11	2	40	.	1	1	1	1	1	90	2	1	2	2	1	90
521	.	C	5	1	11	2	40	4	1	1	1	1	1	70	1	1	1	2	1	.
522	20150602	C	5	1	11	2	44	4	1	1	1	1	1	85	1	1	1	1	1	95
523	20150529	C	5	1	11	2	35	3	1	1	1	1	2	80	1	1	1	1	1	90
524	20150602	C	5	2	11	2	39	5	1	1	1	1	1	90	1	1	1	1	1	90
525	20150529	C	5	1	11	2	45	3	1	1	1	1	1	90	1	1	1	1	1	100
526	20150530	C	5	2	11	2	46	3	1	1	1	1	1	90	1	1	1	1	1	90
527	.	C	5	1	11	2	45	3	1	1	1	2	1	90	1	1	1	1	1	80
528	20150531	C	5	2	11	2	45	4	1	1	1	1	2	80	1	1	1	1	1	90
529	20150529	C	5	1	11	2	44	3	1	1	1	2	1	80	1	1	1	1	1	100
530	.	C	5	2	11	2	33	4	1	1	1	1	1	95	1	1	1	1	1	90
531	20150602	C	5	1	11	2	36	3	1	1	1	1	1	70	1	1	1	2	1	30
532	20150531	C	5	2	11	2	30	3	1	1	1	1	1	100	1	1	1	1	1	100
533	20150601	C	5	2	11	2	37	3	1	1	1	1	1	70	1	1	1	1	1	90
534	20150531	C	5	1	11	2	41	3	1	1	1	1	1	100	1	1	1	1	1	100
535	20150529	C	5	2	11	2	43	4	1	1	1	1	1	90	1	1	1	1	2	90
536	20150531	C	5	2	11	2	39	4	1	1	1	1	1	90	1	1	1	1	1	90
537	20150531	C	5	1	11	2	38	2	1	1	1	2	2	.	1	1	1	1	1	90
538	20150531	C	5	1	11	2	32	3	1	1	1	1	1	95	1	1	1	1	1	100
539	20150531	C	5	2	11	2	40	3	1	1	1	1	1	90	1	1	1	1	1	98
540	20150530	C	5	1	11	2	40	4	1	1	1	1	1	90	1	1	1	1	1	95
541	20150529	C	5	2	11	2	38	4	1	1	1	1	1	100	1	1	1	1	1	100
542	.	C	5	2	11	2	56	1	4	2	3	4	2	.	1	1	1	1	1	90
543	.	C	5	1	11	2	46	4	1	1	1	1	1	70	1	1	1	1	1	.
544	20150602	C	5	1	11	1	43	4	1	1	1	1	1	80	1	1	1	1	1	80
545	20150531	C	5	2	11	1	42	4	1	1	1	1	1	100	1	1	1	1	1	100
546	.	C	5	1	11	2	44	4	1	1	1	1	1	100	1	1	1	1	1	100
547	20150531	C	5	1	11	2	43	4	1	1	1	1	1	100	1	1	1	1	1	100
548	20150531	C	5	2	11	2	35	4	1	1	1	1	1	100	1	1	1	1	1	100
549	20150530	C	5	2	11	2	38	3	1	1	1	2	1	80	1	1	1	2	2	90
550	20150529	C	5	1	11	2	38	4	1	1	1	1	1	99	1	1	1	1	1	100
551	.	C	5	1	11	2	45	3	1	1	1	1	1	50	1	1	1	1	1	.
552	20150601	C	5	1	11	2	43	4	1	1	1	2	1	85	1	1	1	2	1	85
553	20150530	C	5	2	11	2	48	3	1	1	1	1	1	90	1	1	1	1	2	70
554	20150529	C	5	2	11	2	44	4	1	1	1	1	1	70	1	1	1	1	1	85
555	20150531	C	5	2	11	2	39	3	1	1	1	2	1	90	1	1	1	1	1	90
556	20150531	C	5	1	11	2	43	4	1	1	1	2	1	90	2	1	1	2	1	90
557	20150601	C	5	1	11	2	38	4	1	1	1	1	1	100	1	1	1	1	1	75
558	20150531	C	5	2	11	1	38	3	1	1	1	1	1	85	1	1	1	2	1	80
559	.	C	5	1	11	2	36	4	1	1	1	1	1	75	1	1	1	1	1	86
560	20150531	C	5	2	11	2	37	3	1	1	1	1	1	90	1	1	1	1	1	90
561	20150531	C	5	2	11	2	37	3	1	1	1	1	1	90	1	1	1	1	1	90
562	20150601	C	5	1	11	2	42	3	1	1	1	1	1	85	1	1	1	1	1	90
563	20150530	C	5	1	11	1	62	2	1	1	1	1	1	76	1	1	1	1	2	90
564	20150529	C	5	1	11	2	38	4	1	1	1	1	1	90	1	1	1	1	1	100
565	20150602	C	5	1	11	1	49	3	1	1	1	1	1	95	1	1	1	1	1	100
566	20150531	C	5	2	11	2	39	3	1	1	1	1	1	95	1	1	1	2	1	90
567	20150529	C	5	1	11	1	47	3	1	1	1	1	1	85	1	1	1	1	1	90
568	20150529	C	5	2	11	2	38	3	1	1	1	1	1	95	1	1	1	1	1	95
569	20150531	C	5	2	11	2	40	5	1	1	1	1	1	90	1	1	1	1	1	75
570	20150529	C	5	1	11	2	34	3	1	1	1	1	2	95	1	1	1	1	1	100
571	20150601	C	5	2	11	2	42	3	1	1	1	1	1	99	1	1	1	2	1	70
572	20150531	C	5	1	11	.	.	.	1	1	1	1	1	.	1	1	1	1	1	.
573	20150530	C	5	1	11	2	38	4	1	1	1	1	1	98	1	1	1	1	1	98
574	20150531	C	5	1	11	2	52	3	1	1	1	1	1	.	1	1	1	1	1	95
575	.	C	5	2	11	2	35	3	1	1	1	1	1	90	1	1	1	1	1	100
576	20150531	C	6	1	12	2	45	3	1	1	1	2	1	80	1	1	1	1	1	80
577	20150529	C	6	2	12	1	50	3	1	1	1	1	1	100	1	1	2	1	1	100
578	.	C	6	1	12	1	47	3	1	1	1	1	1	85	1	1	1	1	1	90
579	20150531	C	6	1	12	2	41	3	1	1	1	1	1	.	1	1	1	1	1	100
580	20150531	C	6	2	12	2	38	4	1	1	1	1	1	100	1	1	1	1	1	100
581	20150531	C	6	2	12	2	36	4	1	1	1	1	1	100	1	1	1	1	1	100
582	20150531	C	6	2	12	2	44	3	1	1	1	1	2	90	1	1	1	1	1	95
583	20150601	C	6	2	12	2	44	4	1	1	1	1	1	100	1	1	1	1	1	100
584	20150531	C	6	2	12	2	40	3	1	1	1	1	1	80	1	1	1	1	1	90
585	20150531	C	6	2	12	2	40	3	1	1	1	1	2	70	1	1	1	1	1	100
586	20150531	C	6	1	12	2	41	4	1	1	1	1	1	50	1	1	1	1	1	95
587	20150531	C	6	2	12	2	44	3	1	1	1	1	1	100	1	1	1	1	1	90
588	20150530	C	6	1	12	2	38	3	1	1	1	2	1	80	1	1	1	1	1	100
589	.	C	6	2	12	2	43	3	1	1	1	1	1	100	1	1	1	1	1	100
590	20150530	C	6	2	12	2	44	3	1	1	1	3	1	80	1	1	1	1	1	95
591	20150601	C	6	1	12	1	35	3	1	1	1	1	1	85	1	1	1	2	2	85
592	.	C	6	1	12	2	38	3	1	1	1	2	2	90	1	1	1	3	1	100
593	20150604	C	6	1	12	2	45	3	1	1	1	1	1	85	1	1	1	1	1	85
594	20150602	C	6	2	12	2	45	3	1	1	1	1	1	80	1	1	1	1	1	90
595	20150530	C	6	1	12	2	43	3	1	1	1	1	1	100	1	1	1	1	1	90
596	20150531	C	6	2	12	2	40	4	1	1	1	1	1	80	1	1	1	1	1	90
597	20150530	C	6	2	12	2	43	4	1	1	1	2	1	80	1	1	1	1	1	90
598	20150601	C	6	2	12	1	43	3	1	1	1	1	1	80	1	1	1	1	1	.
599	20150529	C	6	2	12	2	38	4	1	1	1	1	1	90	1	1	1	1	1	90
600	20150601	C	6	1	12	2	49	3	1	1	1	1	1	70	1	1	1	2	1	68
601	20150531	C	6	1	12	1	40	4	1	1	1	2	1	80	1	1	1	1	1	100
602	20150531	C	6	1	12	2	41	4	1	1	1	1	1	90	1	1	1	1	1	100
603	20150603	C	6	2	12	2	42	3	1	1	1	1	1	100	1	1	1	1	1	100
604	20150602	C	6	1	12	2	39	4	1	1	1	2	2	80	1	1	1	1	2	95
605	20150531	C	6	2	12	2	52	4	1	1	2	3	1	70	1	1	1	1	1	95
606	20150603	C	6	1	12	2	39	4	1	1	1	1	1	60	1	1	1	1	1	75
607	20150531	C	6	2	12	1	37	3	1	1	1	1	1	99	1	1	1	1	1	95
608	20150604	C	6	2	12	2	39	4	1	1	1	2	1	70	1	1	1	1	1	100
609	20150531	C	6	1	12	2	41	3	1	1	1	1	1	70	1	1	1	1	1	100
610	.	C	6	2	12	2	36	4	1	1	1	1	1	76	1	1	1	1	1	98
611	20150530	C	6	2	12	2	37	4	1	1	1	1	1	95	1	1	1	1	1	80
612	20150602	C	6	1	12	2	40	3	1	1	1	1	1	90	1	1	1	1	1	90
613	20150531	C	6	2	12	2	39	4	1	1	1	1	1	60	1	1	1	1	1	70
614	20150531	C	6	2	12	1	37	.	1	1	1	1	1	100	1	1	1	1	1	100
615	20150531	C	6	1	12	2	41	3	1	1	1	2	2	73	1	1	1	1	1	75
616	20150530	C	6	1	12	2	40	3	1	1	1	1	1	90	1	1	1	1	1	90
617	20150601	C	6	2	12	2	41	3	1	1	1	2	1	80	1	1	1	1	2	80
618	20150531	C	6	2	12	2	41	4	1	1	1	1	1	90	1	1	1	1	1	100
619	20150531	C	6	2	12	1	43	4	1	1	1	1	1	95	1	1	1	2	1	90
620	20150531	C	6	2	12	2	41	3	1	1	1	1	1	90	1	1	1	1	1	95
621	20150601	C	6	1	11	2	50	3	1	1	1	2	1	70	1	1	1	1	1	80
622	20150602	C	6	2	12	.	43	4	1	1	1	1	1	99	1	1	1	1	1	95
623	20150601	C	6	1	12	1	52	3	1	1	1	1	1	85	1	1	1	1	1	80
624	20150531	C	6	1	12	2	36	4	1	1	1	1	1	85	1	1	1	1	1	100
625	20150530	C	6	.	12	2	37	4	1	1	1	1	1	95	1	1	1	1	1	90
626	20150531	C	6	2	12	2	40	5	1	1	1	1	1	90	1	1	1	1	1	85
627	20150531	C	6	1	12	2	36	4	1	1	1	1	1	100	1	1	1	1	1	100
628	20150601	C	6	1	12	2	40	4	1	1	1	2	2	80	1	1	1	2	1	90
629	.	C	6	1	12	2	52	2	2	1	2	3	1	60	1	1	1	2	1	70
630	.	C	6	.	12	2	44	4	1	1	1	1	1	99	1	1	1	1	1	98
631	.	C	6	1	12	1	46	3	1	1	1	1	1	90	1	1	2	1	1	80
632	.	C	.	1	10	2	35	3	1	1	1	1	1	.	1	1	1	1	1	80
633	20150526	D	1	2	7	2	37	3	1	1	1	1	1	95	1	1	1	1	1	95
634	20150526	D	1	1	7	2	42	2	1	1	1	1	1	.	1	1	1	1	1	.
635	20150526	D	1	1	8	2	42	3	1	1	1	2	1	95	1	1	1	1	1	95
636	20150526	D	1	1	7	2	50	3	1	1	1	2	1	95	1	1	1	1	1	95
637	20150526	D	1	1	7	2	35	3	1	1	1	2	1	95	1	1	1	1	1	95
638	20150524	D	1	1	7	2	34	1	1	1	1	1	1	.	1	1	1	1	1	80
639	20150526	D	1	2	7	2	38	4	1	1	1	1	1	100	1	1	1	1	1	.
640	20150526	D	1	1	7	2	63	3	1	1	1	2	1	95	1	1	1	1	1	95
641	.	D	1	1	7	2	63	3	1	1	1	1	1	95	1	1	1	1	1	95
642	20150526	D	1	2	7	2	44	3	1	1	1	2	1	95	1	1	1	1	1	95
643	20150526	D	1	1	7	2	63	3	1	1	1	2	1	95	1	1	1	1	1	95
644	20150526	D	1	2	7	2	57	3	1	1	1	2	1	95	1	1	1	1	1	95
645	20150521	D	2	2	8	2	48	3	1	1	1	1	1	80	1	1	1	1	1	95
646	20150525	D	2	2	8	2	42	3	1	1	1	1	1	80	1	1	1	1	1	100
647	20150521	D	2	2	8	2	60	2	1	1	1	1	1	100	1	1	1	1	1	100
648	20150521	D	2	1	8	2	34	3	1	1	1	1	1	100	1	1	1	1	1	100
649	20150521	D	2	1	8	1	50	3	1	1	1	2	1	87	1	1	1	1	1	90
650	20150521	D	2	1	8	1	44	3	2	1	2	2	2	90	2	1	2	3	1	90
651	20150523	D	2	2	8	2	41	3	1	1	1	1	1	90	1	1	1	1	1	100
652	20150526	D	2	1	8	1	41	.	1	1	1	1	1	.	1	1	1	1	1	100
653	.	D	2	1	8	2	36	3	1	1	1	1	1	90	1	1	1	2	1	80
654	20150525	D	3	2	9	2	42	3	1	1	1	1	1	80	1	1	1	1	1	50
655	20150521	D	3	1	9	2	60	2	1	1	1	1	1	100	1	1	1	1	1	100
656	20150521	D	3	2	9	1	52	1	1	1	1	1	1	.	1	1	1	1	1	.
657	20150523	D	3	2	9	.	.	.	1	1	1	1	1	.	1	1	1	1	1	90
658	20150521	D	3	1	9	2	46	3	1	1	1	1	1	100	1	1	1	1	1	80
659	20150521	D	3	2	9	1	44	3	1	1	1	1	1	100	1	1	1	1	1	100
660	20150521	D	3	1	9	2	32	3	1	1	1	1	1	95	1	1	1	1	1	90
661	20150522	D	3	2	9	2	32	4	1	1	1	1	1	100	1	1	1	1	1	.
662	20150525	D	4	1	10	2	50	.	1	1	2	2	2	80	1	1	1	1	1	90
663	20150522	D	4	1	10	2	30	3	1	2	2	2	2	75	1	2	1	2	2	85
664	20150521	D	4	1	10	1	44	3	2	1	1	1	1	90	1	1	1	1	1	100
665	20150522	D	4	1	10	2	32	4	1	1	1	1	1	100	1	1	1	1	1	100
666	.	D	4	1	10	2	35	3	1	1	1	1	1	90	1	1	1	1	1	100
667	20150521	D	5	2	11	2	53	1	1	1	1	2	1	60	1	1	1	1	1	85
668	20150521	D	5	1	11	2	32	3	1	1	1	1	1	95	1	1	1	1	2	90
669	20150521	D	5	2	11	2	40	3	1	1	1	1	1	.	1	1	1	1	1	100
670	20150521	D	5	1	11	2	36	3	1	1	1	1	2	90	1	1	1	1	1	80
671	20150525	D	6	2	12	2	42	3	1	1	1	1	1	80	1	1	1	1	1	100
672	20150526	D	6	2	12	2	41	3	1	1	1	1	1	80	1	1	1	1	1	80
673	20150521	D	6	2	12	2	35	3	1	1	1	1	2	90	1	1	1	1	1	90
674	20150527	D	6	1	12	2	53	4	1	1	1	1	1	98	1	1	1	1	2	98
675	.	D	6	2	12	1	54	4	1	1	1	1	2	100	1	1	1	1	1	45
676	.	D	6	1	12	2	43	3	1	1	1	1	1	90	1	1	1	1	1	.
677	.	D	.	.	9	2	61	1	1	1	1	1	1	59	1	2	1	1	1	59
678	20150521	D	5	1	11	1	45	4	1	1	1	1	1	95	1	1	1	1	1	100
679	20150521	E	1	1	7	2	45	3	1	1	1	1	1	80	1	1	1	1	1	90
680	20150521	E	1	1	7	2	44	4	1	1	1	1	1	95	1	1	1	1	1	100
681	.	E	1	1	7	2	35	4	1	1	1	1	2	70	1	1	1	1	1	70
682	.	E	1	1	7	2	41	4	1	1	1	1	1	90	1	1	1	1	1	90
683	20150521	E	1	1	7	2	39	3	1	1	1	1	1	100	1	1	1	1	1	100
684	20150521	E	1	1	7	2	38	4	1	1	1	2	2	75	1	1	1	1	2	90
685	20150521	E	1	1	7	2	32	4	1	1	1	1	1	100	1	1	1	1	1	100
686	20150521	E	1	1	7	2	40	3	1	1	1	1	1	85	1	1	1	1	1	95
687	20150525	E	1	1	7	2	35	4	1	1	1	1	1	90	1	1	1	1	1	95
688	20150521	E	1	1	7	2	36	4	1	1	1	1	1	80	1	1	1	1	1	90
689	.	E	1	2	7	2	39	3	1	1	1	1	1	95	1	1	1	1	1	100
690	20150521	E	1	2	7	2	44	3	1	1	1	1	1	100	1	1	1	1	1	100
691	20150521	E	1	2	7	2	43	3	1	1	1	1	1	90	1	1	1	1	1	100
692	20150521	E	1	2	7	2	35	4	1	1	1	1	1	80	1	1	1	1	1	90
693	20150526	E	1	2	7	2	34	4	1	1	1	1	2	50	1	1	1	1	1	100
694	20150521	E	1	2	7	2	28	3	1	1	1	2	2	70	1	1	1	1	2	90
695	20150521	E	1	2	7	2	38	4	1	1	1	1	1	90	1	1	1	1	1	80
696	20150521	E	1	2	7	2	35	4	1	1	1	1	1	90	1	1	1	1	1	100
697	20150526	E	1	2	7	2	34	3	1	1	1	1	2	80	1	1	1	1	1	90
698	20150521	E	1	2	7	2	37	3	1	1	1	1	1	70	1	1	1	1	1	90
699	20150522	E	1	2	7	2	37	4	1	1	1	1	1	85	1	1	1	1	1	60
700	20150521	E	1	1	7	2	40	3	1	1	2	1	1	.	1	2	1	1	2	.
701	.	E	1	1	7	1	39	2	1	1	1	1	1	95	1	1	1	1	1	95
702	.	E	1	2	7	2	36	5	1	1	1	1	1	90	1	1	1	1	1	90
703	20150521	E	1	1	7	2	35	3	1	1	2	3	2	80	1	2	1	1	1	60
704	20150521	E	1	1	7	1	41	3	1	1	1	2	1	90	1	1	1	1	1	98
705	.	E	1	2	7	2	46	3	1	1	1	1	1	100	1	1	1	1	1	100
706	20150521	E	1	2	7	2	36	4	1	1	1	1	1	80	1	1	1	1	1	85
707	20150521	E	1	2	7	2	48	3	1	1	1	1	1	100	1	1	1	1	1	95
708	20150521	E	1	1	7	2	40	4	1	1	1	1	1	90	1	1	1	1	1	100
709	20150525	E	1	1	7	1	35	4	1	1	1	1	1	100	1	1	1	1	1	100
710	20150521	E	1	2	7	2	31	3	1	1	1	1	1	80	1	1	1	1	1	60
711	20150521	E	1	2	7	2	38	4	1	1	1	1	1	70	1	1	1	1	1	70
712	20150521	E	1	1	7	1	44	3	1	1	1	1	1	100	1	1	1	1	1	100
713	20150521	E	1	2	7	2	32	3	1	1	1	3	2	50	1	1	1	1	1	100
714	.	E	1	1	7	2	35	4	1	1	1	1	1	70	1	1	1	1	1	80
715	20150521	E	1	2	7	1	37	3	1	1	1	2	1	90	1	1	1	1	2	100
716	20150521	E	1	2	7	1	50	3	1	1	1	1	1	.	1	1	1	1	1	85
717	20150522	E	1	1	7	2	36	4	1	1	1	1	1	80	1	1	1	1	1	83
718	.	E	1	2	7	2	31	4	1	1	1	1	1	.	1	1	1	1	1	90
719	.	E	2	1	8	1	40	3	1	1	1	1	1	90	1	1	1	1	1	90
720	20150521	E	2	1	8	2	40	3	1	1	1	1	1	100	1	1	1	1	1	100
721	20150520	E	2	2	8	2	31	3	1	1	1	1	1	90	2	2	2	1	1	90
722	20150521	E	2	2	8	2	35	3	1	1	1	2	1	95	1	1	1	2	2	80
723	.	E	2	2	8	2	38	4	1	1	1	1	1	80	1	1	1	1	2	100
724	20150521	E	2	2	8	2	39	4	1	1	1	1	1	85	1	1	1	1	1	90
725	20150521	E	2	1	8	2	61	4	1	1	1	1	1	95	1	1	1	1	1	95
726	.	E	2	1	8	1	70	2	1	1	1	1	1	.	1	1	1	1	1	100
727	20150521	E	2	2	8	2	28	3	1	1	1	2	1	70	1	1	1	1	1	100
728	20150521	E	2	1	8	1	41	3	1	1	1	1	1	90	1	1	1	1	1	90
729	20150521	E	2	1	8	2	29	3	1	1	1	1	1	100	1	1	1	1	1	100
730	20150521	E	2	1	8	2	38	4	1	1	1	1	1	85	1	1	1	1	1	90
731	20150522	E	2	2	8	2	44	4	2	1	1	2	2	65	1	1	1	2	1	100
732	20150522	E	2	2	8	1	40	4	2	1	1	2	1	60	1	1	1	1	1	60
733	20150522	E	2	2	8	2	39	4	1	1	1	2	1	90	1	1	1	1	1	100
734	.	E	2	1	8	2	39	3	1	1	1	2	1	90	1	1	1	2	1	95
735	20150521	E	2	1	8	2	35	4	1	1	1	2	1	80	1	2	1	1	1	95
736	20150524	E	2	2	8	2	43	3	1	1	1	1	1	95	1	1	1	1	1	90
737	20150521	E	2	2	8	2	39	3	1	1	1	1	2	95	1	2	1	1	2	95
738	20150521	E	2	1	8	2	45	1	4	1	2	4	4	50	1	1	1	2	1	100
739	.	E	2	2	8	2	41	4	1	1	1	1	1	90	1	1	1	1	1	90
740	20150522	E	2	1	8	2	37	4	1	1	1	1	1	90	1	1	1	1	1	85
741	20150521	E	2	2	8	2	39	4	1	1	1	1	1	80	1	1	1	1	1	100
742	20150526	E	2	1	8	2	44	3	1	1	1	1	1	90	1	1	1	1	1	90
743	20150525	E	2	2	8	2	30	4	1	1	1	1	1	100	1	1	1	1	1	100
744	20150525	E	2	1	8	2	41	4	1	1	1	1	1	90	1	1	1	1	1	100
745	20150522	E	2	1	8	2	42	3	1	1	1	2	1	95	1	1	1	1	1	100
746	20150527	E	2	2	8	1	43	4	1	1	1	1	1	90	1	1	1	1	1	90
747	20150521	E	2	1	8	2	32	4	1	1	1	1	2	70	1	1	2	1	1	100
748	.	E	2	2	8	2	37	3	1	1	1	1	1	80	1	1	1	1	1	90
749	20150521	E	2	2	8	2	45	3	1	1	1	1	1	100	1	1	1	1	1	100
750	.	E	2	2	8	2	39	3	1	1	1	2	1	95	1	1	1	1	1	95
751	.	E	2	2	8	1	53	2	1	1	1	1	1	.	.	.	.	.	.	.
752	20150527	E	2	2	8	2	37	5	1	1	1	1	1	90	1	1	1	1	1	100
753	20150521	E	2	1	8	2	40	3	1	1	1	1	1	85	1	1	1	1	1	85
754	20150527	E	2	2	8	2	41	3	1	1	1	1	1	90	1	1	1	1	1	100
755	20150525	E	2	1	8	2	32	3	1	1	1	1	1	90	1	1	1	1	1	80
756	20150527	E	2	1	8	2	34	3	1	1	2	2	1	70	1	1	1	1	1	100
757	20150521	E	2	1	8	2	35	3	1	1	1	1	1	85	1	1	1	1	1	95
758	20150521	E	3	2	9	2	.	3	1	1	1	1	1	70	1	1	1	1	1	100
759	20150521	E	3	1	9	1	45	3	1	2	2	1	3	90	1	2	1	1	2	.
760	20150521	E	3	2	9	2	80	1	4	1	4	4	4	30	1	1	1	1	1	95
761	20150521	E	3	2	9	2	36	4	1	1	1	1	1	80	1	1	1	1	1	95
762	20150521	E	3	1	10	2	44	3	1	1	1	1	1	100	1	1	1	1	1	85
763	20150521	E	3	2	9	2	41	3	1	1	1	1	1	.	1	1	1	1	1	95
764	.	E	3	1	9	2	40	3	1	1	1	1	1	.	.	.	.	.	.	.
765	20150522	E	3	1	9	2	42	3	1	1	1	1	1	100	1	1	1	1	1	100
766	20150526	E	3	1	9	2	34	4	1	1	1	1	2	50	1	1	1	1	2	40
767	20150521	E	3	1	9	2	40	3	1	1	1	2	1	99	1	1	1	2	2	74
768	20150521	E	3	2	9	2	38	4	1	1	1	1	1	70	1	1	1	1	1	100
769	20150521	E	3	1	9	2	36	4	1	1	1	1	2	100	1	1	2	1	2	90
770	20150521	E	3	1	9	2	40	3	1	1	1	1	1	90	1	1	1	1	1	100
771	.	E	3	.	9	2	33	3	1	1	1	1	1	80	1	1	1	2	1	.
772	.	E	3	1	9	.	.	.	.	.	.	.	.	.	.	.	.	.	.	.
773	20150528	E	3	1	9	1	48	3	1	1	1	1	1	100	1	1	1	1	1	100
774	20150521	E	3	2	9	2	37	3	1	1	1	1	1	100	1	1	1	1	1	100
775	20150521	E	3	2	9	2	44	1	1	1	1	1	1	.	1	1	2	1	2	.
776	20150528	E	3	2	9	2	39	2	1	1	1	1	3	100	1	1	2	1	2	100
777	20150522	E	3	1	9	2	40	4	1	1	1	2	1	95	1	1	1	1	1	97
778	20150521	E	3	2	9	2	33	3	1	1	1	1	1	.	1	1	1	1	1	100
779	20150529	E	3	1	9	2	47	3	1	1	1	2	1	.	1	1	1	1	2	100
780	20150525	E	3	2	9	2	37	3	1	1	1	1	1	100	1	1	1	1	1	90
781	20150521	E	3	1	9	2	34	3	1	1	1	1	2	90	1	1	1	1	1	95
782	20150521	E	3	1	9	2	38	4	1	1	1	2	2	80	1	1	1	1	1	90
783	.	E	3	1	9	2	72	.	2	1	1	2	4	30	2	1	2	2	2	50
784	20150529	E	3	1	9	1	43	3	1	1	1	2	1	100	1	1	1	1	1	100
785	20150528	E	3	2	9	2	45	.	1	1	1	1	1	20	1	1	1	1	1	100
786	.	E	3	1	9	1	41	3	1	1	1	1	1	90	1	1	1	2	1	80
787	20150528	E	3	1	9	2	42	3	1	1	1	1	1	100	1	1	1	1	1	100
788	20150521	E	3	2	9	2	31	3	1	1	1	1	1	100	1	1	1	1	1	100
789	20150527	E	3	1	9	2	32	3	1	1	1	1	1	100	1	1	1	1	1	100
790	20150528	E	3	2	9	2	42	3	1	1	1	1	1	100	1	1	1	1	1	95
791	20150521	E	3	1	9	2	35	4	1	1	1	1	1	90	1	1	1	1	1	90
792	20150526	E	3	2	9	2	37	4	1	1	1	1	1	80	1	1	1	1	1	90
793	20150528	E	3	1	9	2	45	4	1	1	2	2	2	80	1	1	1	2	2	90
794	20150521	E	3	1	9	2	38	3	1	1	1	1	1	90	1	1	1	2	1	40
795	.	E	4	1	10	2	44	3	1	1	1	1	1	90	1	1	1	1	1	95
796	20150526	E	4	1	10	2	30	4	1	1	1	1	1	100	1	1	1	1	1	100
797	20150522	E	4	2	11	2	34	3	1	1	1	1	1	100	1	1	1	1	1	100
798	20150525	E	4	2	10	1	35	3	1	1	1	1	1	80	1	1	1	1	1	100
799	20150525	E	4	2	10	2	42	3	1	1	1	2	3	75	1	1	1	2	1	80
800	20150527	E	4	1	10	2	34	4	1	1	1	1	1	100	1	1	1	1	1	100
801	20150526	E	4	2	10	2	44	4	1	1	1	1	1	100	1	1	1	1	1	100
802	20150521	E	4	1	10	2	39	4	1	1	1	1	1	90	1	1	1	1	1	95
803	20150524	E	4	2	10	2	36	3	1	1	1	1	1	70	1	1	1	1	1	90
804	20150522	E	4	2	10	2	40	3	1	1	1	1	1	95	1	1	1	1	1	95
805	20150526	E	4	2	10	2	30	3	1	1	1	1	1	80	1	1	1	1	1	80
806	20150525	E	4	2	10	2	35	4	1	1	1	1	1	90	1	1	1	1	1	100
807	20150525	E	4	2	10	2	48	4	1	1	1	1	1	90	1	1	1	1	1	90
808	20150522	E	4	2	10	2	38	4	1	1	1	1	1	100	1	1	1	1	1	90
809	20150525	E	4	1	10	2	33	3	1	1	1	1	1	100	1	1	1	1	1	100
810	.	E	4	2	10	2	44	3	1	1	1	1	1	95	1	1	1	1	1	95
811	.	E	4	2	10	1	33	5	1	1	1	1	1	90	1	1	1	1	1	90
812	20150526	E	4	1	10	2	45	3	1	1	1	1	1	90	1	1	1	1	1	90
813	.	E	4	1	10	2	35	4	1	1	1	1	2	80	1	1	1	1	1	80
814	20150525	E	4	1	10	2	34	3	1	1	1	2	1	90	1	1	1	1	1	95
815	20150525	E	4	2	10	2	44	4	1	1	1	1	1	95	1	1	1	1	1	100
816	20150526	E	4	2	10	2	38	3	1	1	1	1	1	90	1	1	1	1	1	100
817	20150527	E	4	2	10	2	43	4	1	1	2	2	2	50	1	1	1	1	2	85
818	20150526	E	4	1	10	2	45	3	1	1	1	1	2	75	1	1	1	2	1	93
819	20150525	E	4	2	10	2	38	4	1	1	1	1	1	95	1	1	1	1	1	95
820	.	E	4	2	10	2	36	4	1	1	1	2	1	85	1	1	1	1	2	90
821	.	E	4	2	10	2	44	3	1	1	1	1	2	90	1	1	1	1	1	90
822	20150527	E	4	2	10	2	32	3	1	1	1	1	1	100	1	1	1	1	1	100
823	20150524	E	4	1	10	2	34	3	1	1	1	1	2	70	1	1	1	1	1	90
824	20150526	E	4	2	10	2	41	3	2	1	2	2	1	80	1	1	1	1	1	95
825	20150527	E	4	2	10	2	42	3	1	1	1	1	1	70	1	1	1	1	1	80
826	20150526	E	4	2	10	1	33	3	1	1	1	1	1	100	1	1	1	1	1	100
827	20150526	E	4	2	10	2	45	1	2	1	1	3	4	60	1	1	1	2	2	62
828	20150521	E	5	1	11	2	50	3	1	1	1	1	1	90	1	1	1	1	1	90
829	20150522	E	5	1	11	2	46	3	1	1	1	1	1	95	1	1	1	1	1	100
830	20150521	E	5	1	11	2	38	4	1	1	1	1	1	85	1	1	1	1	2	95
831	20150522	E	5	1	11	2	42	3	1	1	1	1	1	100	1	1	1	1	1	100
832	20150526	E	5	1	11	2	44	2	1	1	1	1	1	100	1	1	1	1	1	100
833	20150525	E	5	2	11	2	37	3	1	1	1	1	1	100	1	1	1	1	1	100
834	20150522	E	5	2	11	2	42	4	1	1	1	2	2	60	1	1	1	1	1	80
835	20150521	E	5	1	11	2	39	3	1	1	1	1	1	90	1	1	1	1	1	90
836	.	E	5	2	11	2	39	3	1	1	1	1	1	94	1	1	1	1	1	94
837	20150521	E	5	1	11	2	40	3	1	1	1	1	1	90	1	1	1	1	1	100
838	20150521	E	5	2	11	2	41	3	1	1	1	1	2	90	1	1	1	1	1	90
839	.	E	5	1	11	2	39	1	1	1	1	2	1	90	1	1	1	1	1	97
840	20150521	E	5	2	11	2	38	3	1	1	1	1	1	90	1	1	1	1	1	90
841	.	E	5	1	11	1	50	3	1	1	1	1	1	95	1	1	1	1	1	100
842	20150525	E	5	2	11	2	46	4	1	1	1	.	.	90	1	1	1	1	1	100
843	20150522	E	5	2	11	2	43	3	1	1	1	1	1	80	1	1	1	1	1	75
844	20150523	E	5	2	11	1	41	4	1	1	1	1	1	70	1	1	1	2	1	75
845	.	E	5	1	11	2	37	4	1	1	1	2	2	90	1	1	1	1	1	98
846	.	E	5	2	11	1	55	3	1	1	1	3	1	50	1	1	2	2	2	50
847	20150525	E	5	1	11	2	44	3	1	1	1	1	1	90	1	1	1	2	1	80
848	.	E	5	2	11	2	41	3	1	1	1	1	1	90	1	1	1	1	1	90
849	20150527	E	5	1	11	1	50	4	1	1	1	1	1	100	1	1	1	1	1	95
850	20150527	E	5	2	11	1	50	1	1	1	1	2	1	80	1	1	1	1	1	.
851	20150525	E	5	1	11	2	40	4	1	1	1	1	1	.	1	1	1	1	1	100
852	20150526	E	5	1	12	2	48	2	1	1	3	3	2	70	1	1	1	1	1	90
853	20150526	E	5	1	11	2	33	4	1	1	1	2	2	45	3	1	1	1	1	50
854	20150525	E	5	2	11	2	42	4	1	1	1	1	1	100	1	1	1	1	1	100
855	20150525	E	5	2	11	2	43	.	1	1	1	1	1	90	1	1	1	1	1	78
856	20150523	E	5	1	11	2	45	3	1	1	1	1	1	100	1	1	1	1	1	100
857	20150525	E	5	2	11	2	35	3	1	1	1	1	1	60	1	1	1	1	1	70
858	.	E	5	2	11	.	.	.	.	.	.	.	.	.	1	1	1	1	1	75
859	.	E	5	2	11	2	.	2	1	1	1	1	1	100	1	1	1	1	1	.
860	.	E	5	2	11	2	40	3	1	1	1	1	1	.	1	1	1	1	1	50
861	20150526	E	5	1	12	1	40	3	1	1	1	1	1	97	1	1	1	1	1	95
862	20150521	E	6	2	12	2	37	3	1	1	1	1	1	100	1	1	1	1	1	100
863	20150527	E	6	1	12	2	39	4	1	1	1	1	1	95	1	1	1	1	1	90
864	20150525	E	6	2	12	1	43	4	1	1	1	2	2	100	1	1	1	1	1	100
865	20150524	E	6	1	12	1	39	4	1	1	1	1	1	100	1	1	1	1	1	.
866	20150525	E	6	2	12	2	37	3	1	1	1	1	1	95	1	1	1	1	1	95
867	20150525	E	6	2	12	1	51	4	1	1	1	1	1	90	1	1	1	1	1	90
868	20150524	E	6	1	12	1	55	4	1	1	1	1	1	60	1	1	1	1	1	85
869	20150521	E	6	1	12	1	42	1	1	1	1	1	1	50	1	1	2	1	1	95
870	20150526	E	6	2	12	2	44	4	1	1	1	1	1	70	1	1	1	1	1	90
871	20150525	E	6	2	12	2	38	4	1	1	1	1	1	95	1	1	1	1	1	95
872	20150527	E	6	1	12	2	42	3	1	1	1	1	1	100	1	1	1	2	2	90
873	20150521	E	6	1	12	2	32	3	1	1	1	3	2	50	1	1	1	2	1	85
874	.	E	6	1	11	2	35	4	1	1	1	1	1	70	1	1	1	1	1	80
875	20150521	E	6	1	12	2	47	3	1	1	1	1	1	70	1	1	1	2	1	80
876	20150521	E	6	2	12	2	44	3	2	1	1	2	1	85	1	1	2	1	1	85
877	20150521	E	6	1	12	2	42	4	1	1	1	1	1	80	.	.	.	.	.	.
878	20150521	E	6	2	12	2	42	4	1	1	1	1	2	70	1	1	1	1	2	80
879	20150522	E	6	1	12	1	41	4	1	1	1	1	1	90	1	1	1	1	1	95
880	20150521	E	6	1	12	2	47	3	3	.	.	.	.	.	1	1	1	1	2	40
881	.	E	6	2	12	2	38	4	1	1	4	3	3	95	2	1	1	1	1	95
882	20150525	E	6	1	12	1	.	1	1	1	1	1	1	90	1	1	1	1	1	90
883	20150521	E	6	2	12	2	35	3	1	1	1	1	1	85	1	1	1	1	1	90
884	20150527	E	6	1	12	2	44	4	1	1	1	2	1	95	1	1	1	1	1	90
885	20150526	E	6	1	12	2	45	3	1	1	1	1	2	50	1	1	1	1	1	100
886	20150522	E	6	2	12	1	42	3	1	1	1	2	2	75	1	1	1	2	1	70
887	.	E	6	1	12	2	43	4	1	1	1	1	1	70	3	1	3	2	1	65
888	20150522	E	6	2	12	2	40	3	1	1	1	1	1	95	1	1	1	1	1	90
889	20150525	E	6	2	12	2	44	3	1	1	1	1	1	100	1	1	1	1	1	95
890	20150521	E	6	2	12	2	39	3	1	1	1	1	1	80	1	1	1	1	1	80
891	20150525	E	6	1	12	2	42	4	1	1	1	1	2	100	1	1	1	1	1	100
892	20150522	E	6	1	12	1	44	3	1	1	1	1	1	80	1	1	1	1	.	80
893	.	E	6	1	12	2	40	4	1	1	1	1	1	95	1	1	1	1	1	95
894	20150526	E	6	2	12	2	42	4	1	1	1	1	1	100	1	1	1	1	1	90
895	20150525	E	6	1	12	2	47	3	1	1	1	2	1	80	1	1	1	1	1	100
896	20150526	F	1	1	7	2	32	3	1	1	1	2	2	50	1	1	1	1	1	80
897	20150526	F	1	2	7	2	38	4	1	1	1	1	1	90	1	1	1	1	1	90
898	20150602	F	1	2	7	1	43	3	1	1	1	1	1	70	1	1	1	1	1	100
899	20150526	F	1	2	7	2	40	4	1	1	1	2	1	90	1	1	1	2	1	90
900	20150528	F	1	2	7	2	41	3	1	1	1	1	2	90	1	1	1	1	1	100
901	20150527	F	1	1	7	2	47	3	1	1	1	1	1	90	1	1	1	1	1	80
902	20150528	F	1	2	7	2	40	4	1	1	1	1	1	90	1	1	1	1	1	95
903	20150527	F	1	1	7	2	37	3	1	1	1	1	1	85	1	1	1	1	1	90
904	20150526	F	1	1	7	2	49	3	1	1	1	1	1	90	1	1	1	1	1	90
905	20150528	F	1	2	7	.	.	.	1	1	1	1	1	100	1	1	1	1	1	100
906	20150526	F	1	2	7	2	40	3	1	1	1	1	1	90	1	1	1	1	1	100
907	20150526	F	1	1	7	1	49	3	1	1	1	1	1	97	1	1	1	1	1	95
908	20150526	F	1	2	7	1	35	3	1	1	1	1	1	90	1	1	1	1	1	90
909	20150527	F	1	2	7	2	40	3	1	1	1	1	1	100	1	1	1	1	1	100
910	20150603	F	1	2	7	2	36	3	1	1	1	1	1	95	1	1	1	1	2	90
911	20150526	F	1	2	7	1	46	3	1	1	1	1	1	99	1	1	1	1	1	98
912	20150527	F	1	1	7	2	34	5	1	1	1	1	1	95	1	1	1	1	1	95
913	20150528	F	1	2	7	2	33	4	1	1	1	2	1	70	1	1	1	1	1	90
914	20150526	F	1	2	7	2	44	4	1	1	1	1	1	90	1	1	1	1	1	80
915	20150526	F	1	1	7	2	44	4	1	1	1	1	1	90	1	1	1	1	1	100
916	20150526	F	1	1	7	2	41	4	1	1	1	1	1	90	1	1	1	1	1	100
917	20150526	F	1	1	7	2	36	4	1	1	1	1	1	100	1	1	1	1	1	100
918	20150526	F	1	2	7	2	46	4	1	1	1	1	1	95	1	1	1	1	1	90
919	20150526	F	1	2	7	2	45	3	1	1	1	1	1	95	1	1	1	1	1	100
920	.	F	1	2	7	2	42	3	1	1	1	1	1	70	1	1	1	1	1	80
921	.	F	1	1	7	2	32	4	1	1	1	1	2	80	1	1	1	1	1	80
922	20150526	F	1	1	7	2	43	4	1	1	1	1	1	85	1	1	1	1	1	100
923	20150526	F	1	2	7	2	35	4	1	1	1	1	1	77	1	1	1	1	1	100
924	20150526	F	1	2	7	2	32	4	1	1	1	1	1	90	1	1	1	1	1	90
925	20150527	F	1	2	7	2	36	4	1	1	1	2	1	80	1	1	1	2	1	80
926	20150527	F	1	1	7	2	40	4	1	1	1	1	2	80	1	1	1	1	2	90
927	20150527	F	1	2	7	2	41	4	1	1	1	1	1	80	1	1	1	1	1	90
928	20150527	F	1	2	7	2	33	4	1	1	1	1	1	100	1	1	1	1	1	80
929	20150526	F	1	1	7	2	35	4	1	1	1	1	1	100	1	1	1	1	1	100
930	20150527	F	1	1	7	2	40	3	1	1	1	1	1	65	1	1	2	1	2	70
931	.	F	1	2	7	2	38	4	1	1	1	1	1	.	1	1	1	1	1	.
932	20150527	F	1	1	7	1	34	4	1	1	1	1	1	90	1	1	1	1	1	100
933	20150528	F	1	2	7	2	42	.	1	1	1	1	1	.	1	1	1	1	1	.
934	20150526	F	1	1	7	2	33	3	1	1	1	1	2	90	1	1	1	1	1	70
935	20150527	F	1	2	7	2	47	3	1	1	1	1	1	95	1	1	1	2	1	95
936	20150527	F	1	1	7	2	35	4	1	1	1	1	1	90	1	1	1	1	1	90
937	20150502	F	1	1	7	1	42	4	1	1	1	2	1	85	1	1	1	2	1	90
938	20150526	F	1	2	7	2	39	3	1	1	1	1	1	95	1	1	1	1	1	100
939	.	F	1	2	7	2	37	4	1	1	1	2	2	60	1	2	1	1	2	100
940	20150526	F	1	2	7	1	47	3	1	1	1	1	1	90	1	1	1	1	1	90
941	20150527	F	1	2	7	2	34	3	1	1	1	1	2	90	1	1	1	1	1	70
942	20150528	F	1	1	7	1	33	3	1	1	1	1	1	100	1	1	1	1	1	100
943	20150526	F	1	2	7	2	41	3	1	1	1	1	1	100	1	1	1	1	1	100
944	.	F	1	2	7	1	43	3	1	1	1	1	1	.	1	1	1	1	1	.
945	20150527	F	1	1	7	2	41	3	1	1	1	1	2	85	1	1	1	1	1	90
946	.	F	1	1	7	2	28	3	1	1	1	2	1	70	1	1	1	1	1	90
947	20150528	F	1	2	7	.	.	.	.	.	.	.	.	.	1	1	1	1	1	95
948	20150528	F	2	2	8	2	40	4	1	1	1	1	1	100	1	1	1	1	1	100
949	20150527	F	2	2	8	2	43	4	1	1	1	2	1	90	1	1	1	2	1	90
950	20150527	F	2	2	8	2	40	4	1	1	1	1	1	100	1	1	1	1	1	100
951	20150527	F	2	1	8	2	37	.	1	1	1	1	1	80	1	1	1	1	1	90
952	20150527	F	2	1	8	1	37	4	1	1	1	1	1	89	1	1	1	1	1	85
953	20150527	F	2	1	8	2	39	4	1	1	1	1	1	90	1	1	1	1	1	100
954	20150527	F	2	2	8	2	35	4	1	1	1	1	1	85	1	1	1	1	1	80
955	20150527	F	2	1	8	2	43	3	1	1	1	1	1	80	1	1	1	1	1	95
956	20150530	F	2	1	8	2	35	4	1	1	1	1	1	80	1	1	1	1	1	90
957	20150527	F	2	1	8	2	36	4	1	1	1	1	1	95	1	1	1	1	1	100
958	20150527	F	2	1	8	1	45	5	1	1	1	1	1	100	1	1	1	1	1	100
959	20150529	F	2	2	8	2	38	4	1	1	1	1	1	90	.	.	.	.	.	.
960	20150527	F	2	1	8	2	35	4	1	1	1	2	1	90	1	1	1	1	1	100
961	20150527	F	2	2	8	2	68	.	1	1	1	1	1	90	1	1	1	1	1	.
962	20150527	F	2	2	8	2	33	3	1	1	1	1	1	80	1	1	2	1	1	80
963	20150528	F	2	1	8	2	37	3	1	1	1	1	1	80	1	2	1	1	1	.
964	20150527	F	2	2	8	2	37	4	1	1	1	1	1	80	1	1	1	1	1	90
965	20150527	F	2	2	8	2	34	4	1	1	1	1	2	80	1	1	1	1	1	100
966	20150528	F	2	1	8	2	35	3	1	1	1	1	1	95	1	1	1	1	1	97
967	20150528	F	2	2	8	2	47	4	1	1	1	1	1	95	1	1	1	1	1	95
968	20150527	F	2	1	8	2	42	3	1	1	1	2	1	80	1	1	1	2	1	90
969	.	F	2	1	8	2	35	3	1	1	1	1	2	60	1	1	1	2	1	100
970	20150527	F	2	2	8	2	36	3	1	1	1	1	1	.	1	1	1	1	1	.
971	20150527	F	2	1	8	2	33	4	1	1	1	1	1	.	1	1	1	1	1	100
972	20150527	F	2	1	8	2	36	4	1	1	1	1	1	100	1	1	1	1	1	100
973	.	F	2	2	8	2	34	3	1	1	1	2	1	50	1	1	1	1	1	50
974	20150527	F	2	1	8	2	38	4	1	1	1	1	1	70	1	1	1	1	1	90
975	20150527	F	2	2	8	2	36	4	1	1	1	2	1	80	1	1	1	1	1	80
976	20150527	F	2	1	8	2	34	3	1	1	1	1	1	90	1	1	1	1	2	90
977	20150527	F	2	1	8	2	47	4	1	1	1	2	1	90	1	1	1	1	1	100
978	.	F	2	1	8	2	57	3	1	1	1	2	2	90	1	1	1	1	1	95
979	20150527	F	2	1	9	2	38	4	1	1	1	1	1	85	1	1	1	1	1	90
980	20150527	F	2	2	8	2	35	4	1	1	1	1	1	95	1	1	1	1	1	95
981	20150528	F	2	1	8	2	41	3	1	1	1	1	1	90	1	1	1	1	1	90
982	20150527	F	2	1	8	2	38	4	1	1	1	1	1	95	1	1	1	1	1	100
983	20150527	F	2	1	8	2	37	4	1	1	1	1	1	95	1	1	1	1	1	97
984	20150527	F	2	2	8	2	29	4	1	1	2	2	2	70	2	1	2	1	2	50
985	.	F	2	1	8	1	40	5	1	1	1	1	1	90	1	1	1	1	1	95
986	20150527	F	2	2	8	2	35	4	1	1	1	1	1	85	1	1	1	1	1	100
987	20150527	F	2	1	8	2	43	4	1	1	1	1	1	70	1	1	1	1	1	80
988	20150527	F	2	2	8	2	34	3	1	1	1	1	1	90	1	1	1	1	1	85
989	20150528	F	2	1	8	2	43	3	1	1	1	1	1	70	1	1	1	1	1	80
990	.	F	2	1	8	2	31	4	1	1	1	1	1	85	1	1	1	1	1	90
991	20150527	F	2	1	8	2	41	4	1	1	1	1	1	100	1	1	1	1	1	.
992	20150527	F	2	2	8	2	46	2	1	1	2	2	3	50	1	1	1	1	1	100
993	20150527	F	2	1	8	2	38	4	1	1	1	1	1	80	1	1	1	1	1	80
994	20150527	F	2	2	8	2	39	3	1	1	1	1	1	50	1	1	1	1	1	100
995	20150528	F	2	2	8	1	43	3	1	1	1	1	1	95	1	1	1	1	1	95
996	20150601	F	2	1	8	2	39	3	1	1	1	2	1	.	1	1	1	1	1	.
997	20150528	F	2	2	8	2	42	4	1	1	1	1	2	90	1	1	1	1	1	90
998	20150527	F	2	2	8	2	35	3	1	1	1	1	1	90	1	1	1	1	1	90
999	20150601	F	2	1	8	2	44	3	1	1	1	1	1	92	1	1	1	1	1	80
1000	20150527	F	2	2	8	2	42	3	1	1	1	1	2	70	1	1	1	1	1	90
1001	20150528	F	2	1	8	2	41	3	1	1	1	1	1	80	1	1	1	1	1	90
1002	20150527	F	2	1	8	2	44	4	1	1	1	1	1	90	1	1	1	1	1	100
1003	20150527	F	2	1	8	2	34	4	1	1	1	1	1	90	1	1	1	2	1	95
1004	20150601	F	2	1	8	2	40	3	1	1	1	1	1	80	1	1	1	1	1	80
1005	20150527	F	2	1	8	2	38	4	1	1	1	1	1	100	1	1	1	1	1	100
1006	20150531	F	2	1	8	2	40	3	1	1	1	1	1	80	1	1	1	1	1	80
1007	.	F	2	1	8	2	43	4	1	1	1	1	1	.	1	1	1	1	1	.
1008	20150528	F	2	1	8	2	42	3	1	1	1	1	1	90	1	1	1	1	1	95
1009	20150527	F	2	1	8	1	45	4	1	1	1	1	1	100	1	1	1	1	1	100
1010	20150602	F	2	1	8	2	43	3	1	1	1	1	1	.	1	1	1	1	1	.
1011	20150527	F	2	1	8	2	35	4	1	1	1	1	1	80	1	1	1	1	1	90
1012	20150527	F	2	1	8	2	40	4	1	1	1	1	1	95	1	1	1	1	1	98
1013	.	F	2	1	8	2	38	3	1	1	1	1	1	100	1	1	1	1	1	100
1014	.	F	2	2	8	2	36	.	1	1	2	1	1	100	1	1	3	1	1	100
1015	.	F	2	2	8	2	44	4	1	1	1	2	2	80	1	1	1	1	1	60
1016	20150521	F	3	1	9	2	44	4	1	1	1	2	2	90	1	1	1	2	1	96
1017	20150521	F	3	2	9	2	38	3	1	1	1	1	1	100	1	1	1	1	1	100
1018	20150521	F	3	2	9	2	40	4	1	1	1	1	1	90	1	1	1	1	1	100
1019	20150522	F	3	2	9	2	35	3	1	1	1	2	2	70	1	1	1	1	1	100
1020	20150521	F	3	2	9	2	47	3	1	1	1	1	.	70	2	1	1	2	1	100
1021	.	F	3	2	9	2	36	4	1	1	1	1	1	98	1	1	1	1	1	95
1022	20150521	F	3	2	9	1	42	3	1	1	1	1	1	80	1	1	1	1	1	80
1023	20150520	F	3	2	10	2	44	3	1	1	1	2	1	70	1	1	1	1	1	100
1024	20150520	F	3	1	9	2	37	3	1	1	1	1	1	80	1	1	1	1	1	90
1025	20150521	F	3	1	9	1	40	4	1	1	1	1	1	80	1	1	1	1	1	95
1026	20150521	F	3	1	9	2	41	4	1	1	1	1	2	60	1	1	1	1	1	95
1027	20150520	F	3	1	9	2	39	4	1	1	1	1	1	70	1	1	2	1	1	100
1028	20150520	F	3	1	9	2	43	3	1	1	1	1	2	80	1	1	1	1	2	75
1029	20150521	F	3	1	9	2	47	4	1	1	1	1	1	90	1	1	1	1	1	90
1030	20150521	F	3	1	9	2	42	4	1	1	1	1	1	90	1	1	1	1	1	80
1031	.	F	3	1	9	2	40	4	1	1	1	1	2	.	1	1	1	1	1	.
1032	20150521	F	3	1	9	2	38	4	1	1	1	2	4	80	1	1	1	1	1	100
1033	20150521	F	3	2	9	2	39	4	1	1	1	2	1	70	1	1	1	1	1	100
1034	20150521	F	3	2	9	2	42	3	1	1	1	1	1	99	1	1	1	1	1	100
1035	.	F	3	2	9	1	46	3	1	1	1	1	1	100	1	1	1	1	1	100
1036	20150522	F	3	1	9	2	36	3	1	1	1	1	1	90	1	1	1	1	1	80
1037	20150521	F	3	2	9	2	29	3	1	1	1	1	1	95	1	1	1	1	1	90
1038	.	F	3	1	9	.	.	.	.	.	.	.	.	.	.	.	.	.	.	.
1039	20150520	F	3	1	9	2	55	3	1	1	1	1	1	95	1	1	1	1	1	90
1040	20150523	F	3	2	9	1	41	3	1	1	1	1	1	75	1	1	1	1	1	70
1041	20150602	F	3	2	9	2	42	3	1	1	1	2	2	85	1	1	1	2	3	70
1042	.	F	3	2	9	2	38	4	1	1	1	1	1	81	1	1	1	1	1	100
1043	20150523	F	3	1	9	2	43	4	1	1	1	1	2	80	1	1	1	1	1	100
1044	20150525	F	3	2	9	2	40	4	1	1	1	1	1	90	1	1	1	2	1	90
1045	.	F	3	2	9	2	40	4	1	1	1	1	1	80	2	1	1	1	2	.
1046	20150522	F	3	1	9	2	34	3	1	1	1	1	1	90	1	1	1	1	1	100
1047	20150528	F	3	2	9	2	37	4	1	1	1	1	1	90	1	1	1	1	1	100
1048	20150525	F	3	2	9	2	41	3	1	1	1	1	1	100	1	1	1	1	1	80
1049	20150602	F	3	1	9	2	35	4	1	1	1	1	1	99	1	1	2	2	2	100
1050	20150523	F	3	2	9	2	33	4	1	1	1	2	2	65	1	1	1	1	2	100
1051	20150525	F	3	2	9	2	43	.	1	1	1	1	1	100	1	1	1	1	1	100
1052	20150603	F	3	2	9	2	41	3	1	1	1	1	1	75	1	1	1	1	1	90
1053	.	F	3	1	9	1	46	3	1	1	1	1	1	98	1	2	1	1	1	100
1054	20150525	F	3	1	9	2	37	4	1	1	1	1	1	98	1	1	1	1	1	100
1055	20150524	F	3	2	9	1	36	3	1	1	1	1	1	70	1	1	1	1	1	50
1056	20150525	F	3	1	9	1	39	4	1	1	1	1	1	65	1	1	1	1	1	85
1057	20150524	F	3	2	9	1	44	3	1	1	1	1	1	100	1	1	1	1	1	100
1058	20150603	F	3	1	9	2	.	.	1	1	1	1	1	.	1	1	1	1	1	95
1059	20150525	F	3	2	9	2	42	4	1	1	1	1	1	90	1	1	1	1	1	80
1060	20150525	F	3	1	9	2	39	3	1	1	1	2	2	90	1	1	2	1	2	100
1061	20150522	F	3	1	9	2	36	4	1	1	1	1	1	100	1	1	1	1	1	100
1062	20150603	F	3	1	9	2	48	4	1	1	1	1	1	95	1	1	1	1	2	95
1063	20150526	F	3	2	9	2	40	5	1	1	1	1	1	85	1	1	1	1	1	90
1064	20150527	F	3	1	9	2	42	4	1	1	1	2	2	90	1	2	2	1	2	90
1065	20150526	F	4	1	10	2	43	3	1	1	1	1	1	95	1	1	1	1	1	95
1066	20150520	F	4	1	10	2	42	4	1	1	1	2	2	70	1	1	1	1	1	80
1067	20150521	F	4	2	10	2	38	4	1	1	1	2	1	80	1	1	1	1	1	75
1068	20150528	F	4	1	10	.	.	.	1	1	1	1	1	100	1	1	1	1	1	100
1069	20150520	F	4	1	10	2	42	4	1	1	1	1	1	90	1	1	1	1	1	100
1070	.	F	4	1	10	1	37	4	1	1	1	1	1	80	1	1	1	1	1	90
1071	20150521	F	4	2	10	1	44	4	1	1	1	2	1	83	1	1	1	1	1	80
1072	20150520	F	4	2	10	2	36	4	1	1	1	1	2	97	1	1	1	1	1	95
1073	.	F	4	1	10	2	.	3	1	1	1	1	1	85	1	1	1	1	1	90
1074	20150521	F	4	2	10	2	37	3	1	1	1	2	2	70	1	1	1	1	1	100
1075	20150520	F	4	2	10	2	40	2	1	1	1	2	1	100	1	1	1	1	1	100
1076	20150520	F	4	2	10	2	32	3	1	1	1	1	1	95	1	1	1	1	1	95
1077	20150526	F	4	1	10	2	38	4	1	1	1	1	1	100	1	1	1	1	1	100
1078	.	F	4	2	10	2	45	4	1	1	1	1	1	90	1	1	1	1	1	95
1079	.	F	4	1	10	2	67	2	3	1	5	2	1	50	1	1	1	1	1	.
1080	20150520	F	4	2	10	2	35	4	1	1	1	1	1	80	1	1	1	1	1	95
1081	20150520	F	4	2	10	2	47	3	1	1	1	1	1	.	1	1	1	1	1	.
1082	20150520	F	4	2	10	2	38	3	1	1	1	1	1	80	1	1	1	1	1	100
1083	20150524	F	4	1	10	2	47	3	1	1	1	2	1	80	1	1	1	2	1	95
1084	.	F	4	1	11	2	34	4	1	1	1	1	1	95	1	2	2	1	1	90
1085	.	F	4	2	10	2	46	3	1	1	1	1	1	80	1	1	1	1	1	90
1086	.	F	4	2	10	2	40	3	1	1	1	1	1	80	1	1	1	1	1	90
1087	20150526	F	4	1	10	2	40	4	1	.	1	1	1	100	1	1	1	1	1	100
1088	20150526	F	4	1	10	2	40	4	1	1	1	1	1	80	1	1	1	2	1	100
1089	20150522	F	4	1	10	2	40	4	1	1	1	1	1	80	1	1	1	1	1	90
1090	20150521	F	4	2	10	2	35	4	1	1	1	2	1	90	1	1	1	2	1	70
1091	20150525	F	4	2	10	2	39	3	1	1	1	1	1	75	1	1	1	1	1	55
1092	20150526	F	4	2	10	2	41	3	1	1	1	1	1	70	1	1	1	1	1	95
1093	20150527	F	4	1	10	2	36	3	1	1	1	1	1	.	1	2	1	1	1	35
1094	20150526	F	4	1	10	2	45	4	1	1	1	1	1	85	1	1	1	2	2	90
1095	20150521	F	4	1	10	2	43	4	1	1	1	2	1	70	1	1	1	1	1	80
1096	.	F	4	2	10	2	38	3	1	1	1	1	1	100	1	1	1	1	1	90
1097	20150521	F	4	1	10	2	38	4	1	1	1	1	1	90	1	1	1	1	1	100
1098	20150525	F	4	1	10	2	39	3	1	1	1	1	1	95	1	1	1	1	1	95
1099	20150525	F	4	2	10	2	37	4	1	1	1	1	1	90	1	1	1	1	1	95
1100	20150526	F	4	2	10	2	40	4	1	1	1	1	2	90	1	1	1	1	1	75
1101	20150521	F	4	1	10	2	36	3	1	1	1	1	1	70	1	1	1	1	1	100
1102	20150526	F	4	1	10	2	49	4	1	1	1	2	1	95	1	1	1	1	1	100
1103	20150521	F	4	2	10	2	40	3	1	1	1	1	1	80	1	1	1	1	1	75
1104	20150521	F	4	1	10	2	41	4	1	1	1	1	1	80	1	1	1	1	1	100
1105	20150525	F	4	2	10	2	45	3	1	1	1	2	2	50	1	1	1	1	2	90
1106	20150521	F	4	2	10	2	41	3	1	1	1	1	1	100	1	1	1	1	1	100
1107	20150526	F	4	2	10	2	46	2	1	1	2	2	3	40	1	2	1	1	2	100
1108	20150526	F	4	1	10	2	40	4	1	1	1	1	1	95	1	1	1	1	1	95
1109	.	F	4	2	10	1	45	5	1	1	1	2	1	70	1	1	1	1	1	85
1110	20150528	F	4	2	10	2	35	4	1	1	1	1	1	100	1	1	1	1	1	100
1111	20150521	F	4	1	10	2	43	4	1	1	1	2	2	80	1	1	1	1	1	90
1112	20150527	F	4	2	10	2	37	3	1	1	1	1	1	85	1	1	1	1	1	100
1113	20150520	F	4	2	10	2	43	4	1	1	.	1	1	100	1	1	1	1	1	100
1114	20150526	F	4	2	10	2	45	4	1	1	1	1	1	85	2	1	1	2	1	90
1115	.	F	4	2	10	2	45	.	3	1	1	1	1	.	1	1	1	1	1	.
1116	20150522	F	4	1	10	2	39	4	1	1	1	1	1	90	1	1	1	1	1	95
1117	20150528	F	4	1	10	2	30	4	.	.	.	.	.	.	1	1	1	1	1	.
1118	20150526	F	4	1	10	2	44	3	1	1	1	1	1	90	1	1	1	1	1	90
1119	20150520	F	4	1	10	2	36	3	1	1	1	1	1	90	1	1	1	1	1	85
1120	20150526	F	4	1	10	2	40	3	1	1	1	1	1	95	1	1	1	1	1	100
1121	20150521	F	4	1	10	2	35	5	1	1	1	1	1	95	1	1	1	1	1	99
1122	20150521	F	4	2	10	2	41	4	1	1	1	1	1	100	1	1	1	1	1	90
1123	20150520	F	4	1	10	2	45	4	1	1	1	1	1	99	1	1	1	1	1	100
1124	20150524	F	4	2	10	1	44	3	1	1	1	1	1	100	1	1	1	1	1	100
1125	20150527	F	4	2	10	2	43	3	1	1	1	1	1	100	1	1	1	1	1	100
1126	20150525	F	4	1	10	2	42	3	1	1	1	1	1	70	1	2	1	1	1	80
1127	.	F	4	1	10	2	28	3	1	1	1	2	1	70	1	1	1	1	1	.
1128	20150521	F	4	1	10	2	36	3	1	1	1	1	1	100	1	1	1	1	1	100
1129	.	F	5	2	11	2	.	3	1	1	1	2	1	90	1	1	1	1	1	70
1130	20150520	F	5	1	11	2	39	3	1	1	1	1	1	95	1	1	1	1	1	95
1131	.	F	5	2	11	1	46	4	1	1	1	1	1	95	1	1	1	1	1	80
1132	20150520	F	5	2	11	2	52	2	1	1	1	2	1	70	1	1	1	1	1	100
1133	20150520	F	5	1	11	2	35	3	2	1	1	2	1	80	1	1	1	1	1	94
1134	20150520	F	5	1	11	1	50	3	1	1	1	1	1	.	1	1	1	1	1	.
1135	20150521	F	5	2	11	2	41	4	1	1	1	1	1	100	2	1	1	2	1	90
1136	20150520	F	5	2	11	2	40	2	1	1	2	2	1	100	1	1	1	1	1	100
1137	20150520	F	5	2	11	2	41	3	1	1	1	1	1	90	1	1	1	1	1	95
1138	20150527	F	5	1	11	1	50	3	1	1	1	1	1	80	1	1	1	1	1	90
1139	20150521	F	5	1	11	2	39	3	1	1	1	1	1	90	1	1	1	1	1	100
1140	20150520	F	5	1	11	2	36	3	1	1	1	1	1	90	1	1	1	1	1	78
1141	20150520	F	5	1	11	2	35	3	1	1	2	2	2	80	1	1	1	2	2	80
1142	20150520	F	5	2	11	2	43	3	1	1	1	1	1	95	1	1	1	1	1	95
1143	20150525	F	5	1	11	1	43	4	1	1	1	1	1	.	1	1	1	1	1	.
1144	.	F	5	2	11	2	44	4	1	1	1	1	1	80	1	1	1	1	1	80
1145	20150520	F	5	2	11	1	48	3	1	1	1	1	1	100	1	1	1	1	1	100
1146	20150526	F	5	2	11	2	40	5	1	1	1	1	1	100	1	1	1	1	1	95
1147	20150526	F	5	1	11	2	40	5	1	1	1	1	1	90	1	1	1	1	1	90
1148	20150520	F	5	1	11	2	40	4	1	1	1	1	1	98	.	2	1	1	1	90
1149	20150520	F	5	1	11	2	34	4	1	1	1	1	1	90	1	1	1	1	1	90
1150	.	F	5	2	11	2	41	4	1	1	1	1	2	70	1	1	1	1	1	90
1151	20150527	F	5	1	11	2	.	.	2	1	1	2	1	80	2	1	1	2	1	70
1152	20150520	F	5	1	11	2	40	3	1	1	1	2	2	.	1	1	1	1	1	90
1153	20150520	F	5	1	11	2	35	4	1	1	1	1	1	95	1	1	1	1	1	95
1154	20150527	F	5	1	11	1	52	5	1	1	1	1	1	100	1	1	1	1	1	80
1155	.	F	5	2	11	1	.	3	1	1	1	1	1	.	1	1	1	1	1	70
1156	20150520	F	5	2	11	2	40	4	1	1	1	1	1	90	1	1	1	1	1	100
1157	20150527	F	5	1	11	1	.	1	1	1	1	2	1	70	1	1	1	1	1	70
1158	.	F	5	1	11	2	36	4	1	1	1	1	1	80	1	1	1	1	1	.
1159	20150520	F	5	1	11	2	34	4	1	1	1	1	1	.	1	1	1	1	1	.
1160	20150526	F	5	2	11	2	43	3	1	1	1	1	1	95	1	1	1	1	1	90
1161	20150520	F	5	1	11	2	39	4	1	1	1	1	1	99	1	1	1	1	1	90
1162	20150520	F	5	1	11	2	42	4	1	1	2	2	1	80	1	1	1	1	2	.
1163	20150526	F	5	2	11	2	45	4	2	1	1	2	1	78	1	1	1	1	1	90
1164	20150521	F	5	1	11	2	.	5	1	1	1	1	1	100	1	1	1	1	1	100
1165	20150520	F	5	1	11	2	46	3	1	1	1	1	1	.	1	1	1	1	1	.
1166	20150527	F	5	1	11	1	40	1	1	1	1	1	1	80	1	1	1	1	1	80
1167	20150521	F	5	1	11	2	35	3	1	1	1	1	1	.	1	1	1	1	1	.
1168	20150520	F	5	1	11	1	48	3	1	1	1	1	1	.	1	1	1	1	1	75
1169	.	F	5	1	11	2	41	4	1	1	1	1	1	90	1	1	1	1	1	100
1170	20150520	F	5	2	11	2	36	3	1	1	1	1	1	70	1	1	1	1	1	.
1171	20150527	F	5	1	11	2	36	4	1	1	1	1	1	100	1	1	1	1	1	100
1172	20150522	F	5	1	11	2	43	4	1	1	2	2	2	80	1	1	2	2	1	80
1173	20150528	F	5	1	11	2	34	3	1	1	1	1	1	100	1	1	1	1	1	100
1174	20150520	F	5	1	11	2	35	3	1	1	1	2	2	70	1	1	1	2	1	95
1175	20150520	F	5	1	11	1	45	4	1	1	1	1	2	80	1	1	1	2	2	45
1176	20150520	F	5	2	11	2	37	3	1	1	1	1	1	80	1	1	1	1	1	90
1177	20150520	F	5	1	11	1	43	3	1	1	1	1	2	75	1	1	1	1	1	60
1178	20150521	F	5	1	11	2	36	3	1	2	2	2	2	70	1	1	1	2	2	80
1179	.	F	5	1	11	1	40	4	1	1	1	5	1	70	1	1	1	1	1	100
1180	20150527	F	5	2	11	2	42	4	1	1	1	1	1	100	1	1	1	1	1	100
1181	.	F	5	1	11	2	42	4	1	1	1	1	1	90	1	1	1	1	1	90
1182	20150601	F	5	2	11	2	.	5	1	2	1	1	1	80	1	2	1	1	2	30
1183	20150520	F	5	2	11	1	38	5	1	1	1	1	1	90	1	1	1	1	1	100
1184	20150522	F	5	2	11	2	47	4	1	1	1	1	1	88	1	1	1	1	1	95
1185	20150520	F	5	1	11	2	43	3	1	1	1	1	1	.	1	1	1	1	1	.
1186	20150520	F	5	2	11	2	34	3	1	1	1	2	2	80	1	1	1	1	1	90
1187	20150529	F	5	1	11	.	.	.	.	.	.	.	.	.	1	1	1	1	1	90
1188	20150526	F	5	2	11	2	41	4	1	1	1	1	1	100	1	1	1	1	2	100
1189	20150522	F	5	1	11	1	41	4	1	1	1	1	1	90	1	1	1	1	1	95
1190	20150521	F	5	1	11	2	39	4	1	1	1	1	1	80	1	1	1	1	1	90
1191	20150521	F	5	1	11	2	36	4	1	1	1	1	1	95	1	1	1	1	1	90
1192	.	F	5	2	11	2	39	3	1	1	1	1	1	70	1	1	1	1	1	80
1193	20150521	F	6	1	12	2	42	3	1	1	1	1	1	85	2	1	1	1	1	90
1194	20150522	F	6	1	12	2	42	3	1	1	1	2	1	90	1	1	1	1	1	80
1195	20150521	F	6	2	12	2	43	4	1	1	1	1	2	80	1	1	1	2	2	100
1196	20150521	F	6	2	12	2	35	3	1	1	1	1	1	90	1	1	1	1	1	.
1197	20150521	F	6	1	12	2	41	4	1	1	1	1	1	80	1	1	1	1	1	90
1198	20150526	F	6	2	12	1	44	3	1	1	1	2	1	90	1	1	1	1	1	90
1199	20150521	F	6	2	12	2	38	3	1	1	1	1	1	80	1	1	1	1	1	90
1200	20150521	F	6	1	12	2	39	3	1	1	1	1	1	80	1	1	1	1	1	80
1201	20150521	F	6	2	12	2	38	4	1	1	1	2	1	80	1	1	1	1	2	95
1202	20150526	F	6	2	12	1	44	4	1	1	1	1	1	89	1	1	1	1	1	65
1203	20150526	F	6	1	12	2	40	3	1	1	1	1	1	90	1	1	1	1	1	98
1204	20150521	F	6	2	12	2	43	3	1	1	1	1	1	100	1	1	1	1	1	100
1205	20150521	F	6	2	12	2	40	4	1	1	1	1	1	100	1	1	1	1	1	100
1206	20150521	F	6	1	12	2	42	3	1	1	1	1	1	85	1	1	1	1	1	80
1207	20150521	F	6	2	12	2	37	3	1	1	1	1	1	90	1	1	1	1	1	97
1208	20150522	F	6	1	12	2	51	2	1	1	1	1	1	100	1	1	1	1	1	100
1209	20150521	F	6	1	12	2	39	3	1	1	1	1	1	85	1	1	1	1	1	90
1210	.	F	6	1	12	1	46	3	2	1	1	2	1	.	1	1	1	1	2	90
1211	20150521	F	6	2	12	2	40	3	1	1	1	1	1	80	1	1	1	1	1	85
1212	20150526	F	6	1	12	2	42	4	1	1	1	1	1	90	1	1	1	2	1	60
1213	20150521	F	6	1	12	2	39	4	1	1	1	1	1	100	1	1	1	1	1	100
1214	20150521	F	6	2	12	2	42	3	1	1	1	1	1	90	1	1	1	1	1	80
1215	20150522	F	6	1	12	2	43	3	1	1	1	1	1	70	1	1	1	1	1	65
1216	20150521	F	6	1	12	2	34	4	1	1	1	1	1	90	1	1	1	1	1	95
1217	.	F	6	1	12	2	39	4	1	1	1	2	1	70	1	1	1	2	1	90
1218	20150526	F	6	1	12	2	34	3	1	1	1	1	1	80	1	1	1	1	1	80
1219	20150521	F	6	1	12	2	41	3	1	1	1	1	1	90	1	1	1	2	1	100
1220	20150526	F	6	1	12	2	44	3	1	1	1	1	1	85	1	1	1	1	1	95
1221	20150521	F	6	2	12	2	45	4	1	1	1	2	2	70	1	1	1	2	2	90
1222	20150522	F	6	2	12	2	41	3	1	1	1	1	2	90	1	1	1	1	1	80
1223	20150526	F	6	2	12	2	50	3	1	1	1	2	1	80	1	1	1	1	1	70
1224	20150521	F	6	2	12	2	49	3	1	1	1	1	1	60	1	1	1	1	1	45
1225	20150521	F	6	2	12	2	39	4	1	1	1	1	1	90	1	1	1	1	1	90
1226	20150527	F	6	2	12	.	.	.	.	.	.	.	.	.	1	1	1	1	1	75
1227	20150521	F	6	2	12	2	47	4	1	1	1	2	1	80	1	1	1	1	1	89
1228	20150521	F	6	1	12	2	37	4	1	1	1	1	1	80	1	1	1	1	1	90
1229	20150521	F	6	1	12	2	44	4	1	1	2	2	1	70	1	1	1	1	1	80
1230	20150522	F	6	1	12	2	42	4	1	1	1	1	1	85	1	1	1	2	1	97
1231	20150526	F	6	2	12	1	42	3	1	1	1	2	1	90	1	2	1	1	1	85
1232	20150521	F	6	2	12	2	40	3	1	1	1	1	2	70	2	1	1	2	2	65
1233	20150521	F	6	1	12	2	36	4	1	1	1	1	1	80	1	1	1	1	1	80
1234	20150521	F	6	1	12	1	39	4	1	1	1	1	1	70	1	1	1	1	1	78
1235	20150522	F	6	2	12	2	40	3	1	1	1	1	1	.	1	1	1	1	1	90
1236	20150527	F	6	2	12	2	36	3	1	1	1	1	2	80	1	1	1	2	2	70
1237	20150524	F	6	1	12	2	41	3	1	1	1	2	1	85	2	1	1	1	1	85
1238	.	F	6	2	12	2	39	3	1	1	1	1	1	90	1	1	1	1	1	90
1239	20150526	F	6	2	12	2	41	4	1	1	1	1	1	90	1	1	1	1	1	100
1240	20150526	F	6	1	12	2	40	4	1	1	1	1	1	90	1	1	1	1	1	100
1241	20150525	F	6	2	12	2	39	3	1	1	1	2	2	90	2	1	1	2	2	65
1242	20150526	F	6	2	12	2	40	4	1	1	1	1	1	90	1	1	1	1	1	90
1243	.	F	6	1	12	2	38	4	1	1	1	1	1	80	1	1	1	1	1	90
1244	20150521	F	6	2	12	2	45	4	1	1	1	1	1	80	1	1	2	2	1	.
1245	20150531	F	6	2	12	2	44	4	1	1	1	1	1	60	1	1	1	1	1	93
1246	20150528	F	6	2	12	2	34	3	1	1	1	1	1	100	1	1	1	1	1	100
1247	20150602	F	6	1	12	2	43	4	1	1	1	1	1	90	1	1	1	1	1	90
1248	20150525	F	6	2	12	2	42	3	1	1	1	2	1	90	1	1	1	1	1	90
1249	20150525	F	6	1	12	1	49	4	1	1	1	1	1	85	1	1	1	1	1	100
1250	.	F	6	1	12	2	47	3	1	1	1	1	1	80	1	1	1	1	1	95
1251	20150601	F	6	1	12	2	39	3	1	1	1	1	1	85	1	1	1	1	1	90
1252	20150521	F	6	1	12	2	40	3	1	1	1	1	1	100	1	1	1	1	1	80
1253	20150521	F	6	2	12	2	38	3	1	1	1	1	1	95	1	1	1	1	1	85
1254	20150526	F	6	1	12	2	46	3	1	1	1	2	2	60	1	1	1	1	1	.
1255	20150521	F	6	2	12	2	41	3	1	1	1	1	1	80	1	1	1	1	1	85
1256	20150521	F	6	1	12	1	45	4	1	1	1	2	2	80	2	1	1	1	1	90
1257	20150525	F	6	1	13	1	55	3	1	1	1	1	1	.	1	1	1	1	1	93
1258	20150521	F	6	2	12	2	36	3	1	1	1	1	1	100	1	1	1	1	1	100
1259	20150525	F	6	2	12	2	42	3	1	1	1	1	1	100	1	1	1	1	1	100
1260	20150521	F	6	1	12	2	38	5	1	1	1	1	1	100	1	1	1	1	1	100
1261	20150522	F	6	2	13	2	41	4	1	1	1	1	1	70	1	1	3	1	1	70
1262	20150521	F	6	2	12	2	45	3	1	1	2	2	2	75	1	1	1	2	2	80
1263	.	F	6	2	12	1	39	3	1	1	1	1	1	90	1	1	1	1	2	100
1264	20150522	F	6	2	12	2	40	3	1	1	1	1	1	90	1	1	1	1	1	90
1265	20150525	F	6	1	12	2	42	4	1	1	1	1	1	90	1	1	1	1	1	85
1266	20150603	F	6	1	12	2	47	3	1	1	1	2	1	89	1	1	1	2	1	.
1267	.	F	6	2	12	2	36	4	1	1	1	1	1	80	1	1	1	1	1	.
1268	.	F	6	2	12	.	49	4	1	1	1	1	1	.	1	1	1	1	1	100
1269	20150521	F	6	2	12	2	40	4	1	1	1	1	1	70	1	1	1	1	1	100
1270	20150520	G	1	2	7	2	33	4	1	1	1	2	2	60	1	1	1	1	1	90
1271	20150520	G	1	1	7	2	36	3	1	1	1	1	1	80	1	1	1	1	1	90
1272	20150521	G	1	2	7	2	.	1	1	1	1	1	1	.	1	1	1	1	1	.
1273	20150520	G	1	1	7	1	49	3	1	1	1	1	1	0	2	1	1	2	1	.
1274	20150520	G	1	1	7	1	43	4	1	1	1	1	2	85	2	1	2	2	2	70
1275	.	G	1	2	8	2	40	3	1	1	1	1	2	80	1	1	1	1	1	90
1276	20150527	G	1	1	7	1	48	3	1	1	1	1	1	95	1	1	1	1	1	95
1277	20150521	G	1	2	7	2	37	2	1	1	1	2	1	85	1	1	1	1	2	95
1278	20150521	G	1	1	7	2	41	3	1	1	1	1	1	.	1	1	1	1	1	.
1279	20150520	G	1	1	7	2	37	5	1	1	1	1	1	90	1	1	1	1	1	100
1280	20150521	G	1	2	7	2	42	4	1	1	1	2	2	85	1	1	1	1	1	90
1281	20150520	G	1	2	7	2	42	4	1	1	1	2	1	90	1	1	1	1	.	.
1282	20150520	G	1	2	7	2	33	4	1	1	1	2	1	90	1	1	1	1	1	100
1283	20150520	G	1	2	8	2	34	4	1	1	1	1	1	50	1	1	1	1	2	90
1284	20150520	G	1	1	7	2	38	4	2	1	3	3	1	60	1	1	1	2	1	90
1285	20150526	G	1	1	7	2	29	3	1	1	1	1	1	90	1	1	1	1	1	90
1286	20150520	G	1	1	7	1	38	4	1	1	1	1	1	99	1	1	1	1	1	100
1287	20150520	G	1	1	7	1	28	3	1	1	1	2	1	90	1	1	1	1	1	95
1288	20150520	G	1	1	7	2	39	3	1	1	1	1	2	.	1	1	1	1	1	.
1289	20150520	G	1	1	7	2	36	3	1	1	1	1	1	100	1	1	1	1	2	90
1290	20150527	G	1	1	7	2	36	3	1	1	1	2	2	70	1	1	1	1	1	90
1291	20150520	G	1	1	7	1	38	4	1	1	1	1	1	90	1	1	1	1	1	95
1292	20150520	G	1	1	8	1	38	4	1	1	1	1	1	.	1	2	2	1	1	80
1293	20150520	G	1	2	7	2	40	4	1	1	1	1	1	90	1	1	1	1	1	100
1294	.	G	1	1	7	2	36	3	1	1	1	1	1	100	1	1	1	1	1	100
1295	20150522	G	1	1	7	2	36	4	1	1	1	1	1	95	1	1	1	1	1	80
1296	20150520	G	1	2	7	2	40	4	1	1	1	1	1	80	1	1	1	1	1	100
1297	20150520	G	1	1	7	2	28	3	1	1	1	1	1	.	1	1	1	1	1	99
1298	.	G	1	2	7	2	36	3	1	1	1	1	2	70	1	1	1	1	1	80
1299	20150520	G	1	1	7	2	35	3	1	1	1	1	1	80	1	1	1	1	1	90
1300	20150522	G	1	1	7	.	.	.	1	1	1	1	1	70	1	1	1	1	1	.
1301	20150520	G	1	1	7	2	36	3	1	1	1	1	2	100	1	1	1	1	1	100
1302	20150522	G	1	1	7	2	40	1	1	1	1	1	1	70	1	1	1	1	1	.
1303	20150520	G	1	1	7	2	35	4	1	1	1	1	1	100	1	1	1	1	1	100
1304	20150520	G	1	1	7	2	40	4	1	1	1	1	1	95	1	1	1	1	1	95
1305	20150522	G	1	1	7	2	.	.	1	1	1	1	1	.	1	1	1	1	1	90
1306	.	G	1	2	7	2	47	4	1	1	1	1	1	100	1	1	1	1	1	90
1307	.	G	1	2	7	2	47	4	1	1	1	1	1	100	1	1	1	1	1	.
1308	20150521	G	1	2	7	2	34	4	1	1	1	1	1	90	1	1	1	1	1	98
1309	20150520	G	1	1	7	2	28	3	1	1	1	1	1	100	1	1	1	1	1	100
1310	20150520	G	1	1	7	2	36	4	1	1	1	1	1	90	1	2	1	1	2	90
1311	20150522	G	2	1	9	2	32	3	1	1	1	2	1	70	1	1	1	2	1	70
1312	20150523	G	2	1	8	2	28	3	1	1	1	1	1	100	1	1	1	1	1	100
1313	20150520	G	2	2	8	2	38	4	1	1	1	1	1	90	1	1	1	1	1	80
1314	20150520	G	2	1	8	2	33	4	1	1	1	1	1	90	1	1	1	1	1	90
1315	20150520	G	2	1	8	2	38	4	1	1	1	1	1	90	1	1	1	1	1	100
1316	20150520	G	2	1	8	2	34	3	1	1	1	1	1	90	1	1	1	1	1	95
1317	20150526	G	2	2	8	1	54	3	1	1	1	1	1	90	1	1	1	1	1	95
1318	20150520	G	2	2	8	2	39	3	1	1	1	1	2	75	1	1	1	1	1	90
1319	.	G	2	2	8	2	40	3	1	1	1	1	1	100	1	1	1	1	1	100
1320	20150520	G	2	2	8	2	34	3	1	1	1	1	1	90	1	1	1	1	2	100
1321	.	G	2	1	8	2	47	.	1	1	1	1	2	80	1	1	1	1	1	90
1322	20150523	G	2	2	8	2	34	3	1	1	1	1	1	70	1	1	1	1	1	.
1323	20150520	G	2	1	8	2	38	4	1	1	1	2	2	70	1	1	1	1	1	90
1324	20150527	G	2	2	9	2	44	3	1	1	1	1	2	.	1	2	2	1	2	80
1325	20150520	G	2	2	8	2	42	.	1	1	1	1	1	70	1	2	2	2	1	70
1326	20150520	G	2	1	8	2	43	5	1	1	1	1	1	80	1	1	1	1	1	80
1327	20150521	G	2	2	8	2	37	4	1	1	1	1	2	85	1	1	1	2	1	50
1328	20150520	G	2	2	8	2	35	3	1	1	1	1	1	80	1	1	1	1	1	100
1329	20150519	G	2	2	8	2	40	3	1	1	1	2	1	90	1	1	1	1	1	95
1330	.	G	2	2	8	2	38	3	1	1	1	1	2	80	1	1	1	1	1	90
1331	20150520	G	2	1	8	2	47	4	1	1	1	1	1	100	1	1	1	1	1	100
1332	.	G	2	2	8	2	42	4	1	1	1	1	1	100	1	1	1	1	1	100
1333	20150520	G	2	1	8	2	42	4	1	1	1	1	1	90	1	1	1	1	1	98
1334	20150520	G	2	1	8	2	34	3	1	1	1	1	1	70	1	1	1	1	1	90
1335	20150520	G	2	1	8	2	36	4	2	1	2	2	1	85	1	1	1	2	2	97
1336	20150520	G	2	1	8	2	35	3	1	1	1	1	1	95	1	1	1	1	1	100
1337	20150520	G	2	2	8	2	35	4	1	1	1	1	1	100	1	1	1	1	1	.
1338	20150521	G	2	2	8	2	36	3	1	1	1	1	1	70	1	1	1	1	1	60
1339	20150520	G	2	2	8	2	35	3	1	1	1	1	1	90	1	1	1	1	2	95
1340	20150520	G	2	2	8	2	36	4	1	1	1	1	1	80	1	1	1	1	1	90
1341	.	G	2	1	8	.	.	.	1	1	1	1	1	100	1	1	1	1	1	.
1342	.	G	2	2	8	2	40	4	1	1	1	1	1	95	1	1	1	1	1	95
1343	20150520	G	2	1	8	2	31	4	1	1	1	1	1	95	1	1	1	1	1	95
1344	20150520	G	2	2	8	1	41	3	1	1	1	1	2	100	1	1	1	1	1	100
1345	20150520	G	2	2	8	1	45	3	1	1	1	1	1	100	1	1	1	1	1	.
1346	20150520	G	2	1	8	2	35	4	1	1	1	1	2	80	1	1	1	1	1	100
1347	20150520	G	2	2	8	2	26	1	1	1	1	1	2	90	1	1	1	1	1	80
1348	20150520	G	2	2	8	2	44	4	1	1	1	1	1	95	1	1	1	1	1	100
1349	20150520	G	2	2	8	2	35	3	1	1	1	2	2	60	1	1	1	1	1	97
1350	20150520	G	2	1	8	2	28	3	1	1	1	1	1	100	1	1	1	1	1	100
1351	20150520	G	2	2	8	.	.	.	1	1	1	1	1	95	1	1	1	1	1	.
1352	20150521	G	2	2	8	2	42	4	1	1	1	1	1	85	1	1	1	1	1	90
1353	20150521	G	2	2	8	1	34	4	1	1	1	1	1	90	1	1	1	1	1	100
1354	20150520	G	3	1	9	1	42	3	1	1	1	1	1	70	1	1	1	1	1	90
1355	20150520	G	3	1	9	2	40	3	1	1	1	1	1	85	1	1	1	1	1	100
1356	20150520	G	3	2	9	2	40	3	1	1	1	1	1	80	1	1	1	1	1	90
1357	20150520	G	3	1	9	2	44	3	1	1	1	1	1	100	1	1	1	1	1	100
1358	20150525	G	3	1	9	1	37	4	1	1	1	1	1	90	1	1	1	1	1	100
1359	20150520	G	3	1	9	2	43	3	1	1	1	1	1	100	1	1	1	1	1	100
1360	.	G	3	1	9	2	58	1	1	1	1	1	1	100	1	1	1	1	1	.
1361	20150521	G	3	2	9	2	39	4	1	1	1	1	1	100	1	1	1	1	1	100
1362	20150520	G	3	1	9	2	46	4	1	1	1	1	1	95	1	1	1	1	1	95
1363	20150520	G	3	1	9	2	35	4	1	1	1	1	1	100	1	1	1	1	1	100
1364	20150520	G	3	1	9	2	35	4	1	1	1	1	1	80	1	1	1	1	1	80
1365	.	G	3	2	9	2	46	3	1	1	1	1	1	90	1	1	1	1	1	100
1366	20150520	G	3	2	9	2	40	4	1	1	1	2	1	85	1	1	1	1	1	100
1367	20150520	G	3	1	9	2	42	3	1	1	1	1	1	100	1	1	1	1	1	80
1368	.	G	3	2	9	1	44	4	1	1	1	1	1	100	1	1	1	1	1	100
1369	20150520	G	3	2	9	2	40	4	1	1	1	1	2	80	1	1	1	1	1	95
1370	20150520	G	3	1	9	1	28	3	1	1	1	1	1	90	1	1	1	1	1	98
1371	20150520	G	3	2	9	2	43	5	1	1	1	1	1	80	1	1	1	1	1	100
1372	20150521	G	3	2	9	2	37	.	1	1	1	1	1	65	1	1	1	2	1	65
1373	20150521	G	3	2	9	1	42	4	1	1	1	2	2	84	1	1	1	2	2	80
1374	20150520	G	3	1	9	1	40	5	1	1	1	2	1	80	1	1	1	1	1	90
1375	20150520	G	3	2	9	2	41	4	1	1	1	1	1	90	1	1	1	1	1	100
1376	20150520	G	3	1	9	2	41	4	1	1	1	1	2	70	1	1	1	1	2	100
1377	.	G	3	1	9	2	42	4	1	1	1	1	1	100	1	1	1	1	1	100
1378	20150521	G	3	1	9	2	34	4	1	1	1	1	1	90	1	1	2	2	1	90
1379	20150520	G	4	2	10	.	40	3	1	1	1	1	1	80	1	1	1	1	1	85
1380	.	G	4	2	10	2	69	1	1	1	1	1	1	.	1	1	1	1	1	90
1381	20150520	G	4	1	10	2	37	3	1	1	1	1	1	75	1	1	1	1	1	.
1382	20150527	G	4	1	10	2	38	4	1	1	1	1	1	100	1	1	1	1	1	100
1383	20150521	G	4	1	10	2	.	4	1	1	1	1	1	80	1	1	1	1	1	40
1384	20150527	G	4	2	10	2	37	4	1	1	1	1	1	100	1	1	1	1	1	100
1385	20150520	G	4	1	10	2	39	3	1	1	1	1	2	70	1	1	2	1	2	.
1386	20150520	G	4	2	10	2	39	4	1	1	1	1	1	90	1	1	1	1	1	100
1387	20150526	G	4	2	10	2	37	5	1	1	1	1	1	98	1	1	1	1	1	80
1388	20150527	G	4	2	10	2	40	2	1	1	2	1	1	70	1	2	2	1	1	90
1389	20150526	G	4	1	10	1	39	3	1	1	1	1	1	100	1	1	1	1	1	100
1390	20150526	G	4	1	10	1	65	3	1	1	1	2	1	90	1	2	2	1	1	95
1391	20150520	G	4	2	10	2	50	3	1	1	1	1	1	.	1	1	1	1	1	85
1392	20150520	G	4	1	10	1	40	3	1	1	1	1	2	100	1	1	1	1	1	100
1393	20150527	G	4	2	10	.	45	.	1	1	1	1	1	70	1	1	1	1	2	30
1394	20150527	G	4	2	10	1	48	5	1	1	1	1	1	100	1	1	1	1	1	90
1395	.	G	4	2	10	1	44	3	1	1	1	1	1	95	1	1	1	1	1	99
1396	.	G	4	1	10	1	41	4	2	1	1	2	2	60	1	1	1	1	1	90
1397	20150601	G	4	1	10	.	45	2	1	1	1	1	2	60	1	1	1	1	1	90
1398	20150523	G	4	2	10	2	55	3	1	1	1	1	1	60	2	1	1	1	1	65
1399	20150520	G	4	2	10	2	36	3	1	1	1	1	1	100	1	1	1	1	1	100
1400	20150521	G	4	1	10	2	32	3	1	1	1	1	1	80	1	1	1	1	2	90
1401	20150520	G	4	2	10	1	41	3	1	1	1	1	1	90	1	1	1	1	1	95
1402	20150520	G	4	2	10	2	36	4	1	1	1	1	1	90	1	1	1	1	1	95
1403	20150520	G	4	2	10	2	41	4	1	1	1	2	1	70	1	1	1	1	1	60
1404	20150520	G	4	2	11	2	41	3	1	1	1	1	1	85	1	1	1	1	1	95
1405	.	G	4	1	10	2	39	4	1	1	1	1	1	90	1	1	1	1	1	100
1406	20150520	G	4	2	10	2	34	3	2	1	2	2	1	60	1	1	1	1	1	90
1407	20150520	G	4	2	10	1	44	4	1	1	1	1	1	80	1	1	1	1	1	55
1408	.	G	4	2	10	2	38	4	1	1	1	1	1	90	1	1	1	1	1	95
1409	20150527	G	4	2	10	1	43	3	1	1	1	1	1	90	1	1	1	1	1	98
1410	20150526	G	4	2	10	2	46	3	1	1	1	1	1	100	1	1	1	2	1	95
1411	20150520	G	4	2	10	2	43	3	1	1	1	1	1	100	1	1	1	1	1	100
1412	20150527	G	4	1	10	2	33	3	1	1	1	1	2	70	.	.	.	.	.	.
1413	20150520	G	4	1	10	2	36	4	1	1	1	1	1	70	1	1	1	1	1	90
1414	20150520	G	4	2	10	2	43	4	1	1	1	2	2	50	1	1	1	2	2	60
1415	20150522	G	4	1	10	2	41	4	1	1	1	1	1	95	1	1	1	1	1	99
1416	20150521	G	4	1	10	2	41	4	1	1	1	2	1	80	1	1	1	1	1	85
1417	20150527	G	4	1	10	1	26	4	1	1	1	1	1	50	.	.	.	.	.	.
1418	20150520	G	4	2	10	1	49	4	1	1	1	1	1	75	1	1	1	1	1	50
1419	20150525	G	4	2	10	2	44	4	1	1	1	1	1	.	1	1	1	1	1	100
1420	20150520	G	4	2	10	2	42	3	1	1	1	3	3	60	1	1	1	1	1	98
1421	20150521	G	4	2	10	2	34	3	1	1	1	1	1	100	1	1	1	1	1	100
1422	20150521	G	4	1	10	2	39	1	1	1	1	2	2	90	1	1	1	1	1	95
1423	20150520	G	4	2	10	2	39	3	1	1	1	1	1	90	1	1	1	1	1	95
1424	.	G	4	2	10	2	41	3	1	1	1	2	1	0	1	1	1	1	1	100
1425	.	G	5	2	11	2	42	4	1	1	1	1	1	80	1	1	1	1	2	70
1426	.	G	5	1	11	2	40	3	1	1	1	1	1	100	1	1	1	1	1	100
1427	20150526	G	5	1	11	2	39	4	1	1	1	1	1	90	1	1	1	1	1	90
1428	20150528	G	5	1	11	2	.	3	1	1	1	2	1	95	1	1	1	2	1	95
1429	.	G	5	2	11	2	42	4	1	1	1	1	1	80	1	1	1	1	1	70
1430	20150526	G	5	1	11	2	46	1	1	1	1	2	1	70	1	2	1	1	1	80
1431	20150526	G	5	1	11	2	43	3	1	1	1	1	1	100	1	1	1	1	1	90
1432	20150527	G	5	2	11	2	52	1	1	1	1	1	1	100	1	1	1	1	1	100
1433	20150526	G	5	1	11	1	26	4	1	1	1	1	1	50	1	1	1	1	1	40
1434	20150527	G	5	1	11	1	43	1	1	1	1	1	1	94	3	3	3	2	2	95
1435	20150526	G	5	2	11	2	39	4	1	1	1	1	1	70	2	1	1	1	1	90
1436	20150526	G	5	2	11	2	39	3	1	1	1	1	1	100	1	1	1	1	1	100
1437	20150526	G	5	2	11	2	37	3	1	1	2	3	1	100	1	1	1	2	1	95
1438	20150526	G	5	2	11	2	36	2	1	1	1	1	1	80	1	1	1	1	1	90
1439	20150527	G	5	2	11	2	47	4	1	1	1	2	1	85	1	1	1	1	1	100
1440	20150526	G	5	1	11	2	41	3	1	1	1	1	1	75	1	1	1	1	1	75
1441	20150526	G	5	2	11	2	41	4	1	1	1	1	1	80	1	1	1	1	1	80
1442	20150527	G	5	2	11	2	48	3	1	1	1	1	1	100	1	1	1	1	1	100
1443	.	G	5	2	11	2	59	3	1	1	1	1	1	.	1	1	1	1	1	.
1444	20150526	G	5	1	11	1	26	4	1	1	1	1	1	50	1	1	1	1	1	80
1445	20150527	G	5	1	11	2	46	3	1	1	1	1	1	100	1	1	1	1	1	70
1446	20150526	G	5	1	11	2	41	4	1	1	1	2	2	60	1	1	1	1	1	82
1447	20150526	G	5	1	11	1	36	4	1	1	1	1	1	50	1	1	1	1	1	90
1448	20150526	G	5	2	11	1	46	4	1	1	1	1	1	90	1	1	1	1	1	80
1449	.	G	5	2	11	1	42	3	1	1	1	1	1	75	1	1	1	1	1	90
1450	.	G	5	1	11	1	65	3	1	1	1	2	1	90	1	2	2	1	2	95
1451	20150526	G	5	1	11	2	40	4	1	1	1	1	1	90	1	1	1	1	1	90
1452	20150526	G	5	2	11	1	58	3	1	1	1	1	1	70	1	1	1	1	1	60
1453	20150526	G	5	1	11	2	45	3	1	1	1	1	1	90	1	1	1	1	1	40
1454	20150526	G	5	1	11	2	40	4	1	1	1	1	1	85	1	1	1	1	1	90
1455	20150528	G	5	1	11	2	44	3	1	1	1	1	1	80	1	1	1	1	1	80
1456	20150526	G	5	2	11	1	.	.	1	1	1	1	1	.	1	1	1	1	1	.
1457	.	G	5	1	11	2	48	3	1	1	1	1	1	80	1	1	1	1	1	.
1458	20150526	G	5	1	11	2	32	3	1	1	1	2	1	40	1	1	1	1	1	90
1459	.	G	6	1	12	2	42	4	1	1	1	1	1	100	1	1	2	3	3	50
1460	20150526	G	6	1	12	2	52	2	1	1	1	1	1	90	1	3	1	1	1	90
1461	20150526	G	6	1	12	2	40	3	1	1	1	1	1	100	1	1	1	1	1	70
1462	20150526	G	6	1	15	2	48	3	1	1	1	1	1	.	.	.	.	.	.	.
1463	20150526	G	6	1	12	2	45	4	1	1	1	1	1	90	1	1	1	1	1	90
1464	20150526	G	6	2	12	2	47	3	1	1	1	1	1	80	1	1	1	1	1	100
1465	20150526	G	6	2	12	2	36	3	1	1	1	1	1	90	1	1	1	1	1	80
1466	20150526	G	6	2	12	2	40	3	3	2	3	3	2	30	1	1	1	2	2	.
1467	20150522	G	6	2	12	2	70	1	4	2	3	3	2	50	1	1	1	1	1	70
1468	20150526	G	6	2	12	2	70	1	4	2	3	3	2	50	1	1	1	1	1	90
1469	20150526	G	6	1	12	1	48	4	1	1	1	1	1	90	1	1	1	1	1	90
1470	20150526	G	6	2	12	2	56	3	1	1	1	1	1	80	1	1	1	1	2	50
1471	20150526	G	6	1	12	2	51	5	3	3	3	3	3	70	2	3	2	1	2	60
1472	20150526	G	6	2	12	2	42	4	1	1	1	2	1	80	1	1	2	2	2	65
1473	20150526	G	6	2	12	2	45	4	1	1	1	2	2	85	1	1	1	1	2	88
1474	20150526	G	6	2	12	2	60	1	1	1	1	3	1	50	1	2	2	1	1	60
1475	20150526	G	6	2	12	2	53	1	1	1	1	1	1	95	1	1	1	1	1	100
1476	20150526	G	6	1	12	1	45	4	1	1	1	2	1	90	1	1	1	1	1	97
1477	20150526	G	6	2	12	2	36	3	1	1	2	2	1	.	1	1	1	1	1	80
1478	20150526	G	6	1	12	1	53	4	1	1	1	1	1	90	1	1	1	1	1	90
1479	20150526	G	6	1	12	1	44	4	1	1	1	2	1	70	1	1	1	2	1	80
1480	20150526	G	6	1	12	2	52	3	1	1	1	1	1	.	1	1	1	1	1	90
1481	20150522	G	6	2	12	2	40	4	1	1	1	2	2	75	1	1	1	2	2	80
1482	20150526	G	6	2	12	2	36	2	1	1	1	1	1	80	1	1	1	2	1	90
1483	20150526	G	6	1	12	2	41	4	1	1	1	1	1	90	1	1	1	1	1	100
1484	.	G	6	1	12	2	41	4	1	1	1	2	2	60	1	1	1	1	1	90
1485	20150526	G	6	2	12	2	39	3	1	1	1	1	1	80	1	1	1	1	1	85
1486	20150526	G	6	1	12	2	39	4	1	1	1	1	1	98	1	1	1	1	1	100
1487	20150526	G	6	2	12	2	39	5	1	1	1	1	1	90	1	1	1	1	1	85
1488	.	G	6	1	12	2	40	3	1	1	1	1	1	50	1	1	1	1	1	.
1489	20150526	G	6	2	12	2	38	4	1	1	1	1	1	90	1	1	1	1	1	50
1490	20150526	G	6	1	12	2	.	5	1	1	1	1	1	75	1	1	1	1	1	75
1491	20150526	G	6	1	12	1	41	3	1	1	1	1	1	85	1	1	1	1	1	90
1492	20150526	G	6	2	12	2	43	3	1	1	1	1	1	70	1	1	1	1	1	100
1493	20150526	G	6	1	12	2	44	3	1	1	1	1	1	.	1	1	1	1	1	.
1494	20150526	G	6	1	12	2	43	4	1	1	1	1	1	70	1	1	1	1	1	80
1495	20150526	G	6	2	12	2	38	4	1	1	1	1	1	90	1	1	1	1	1	85
1496	20150526	G	6	2	12	2	39	4	1	1	1	1	1	70	1	1	1	1	1	100
1497	20150526	G	6	2	12	1	39	3	1	1	1	1	1	100	1	1	1	1	1	95
1498	20150526	G	6	2	12	2	40	4	1	1	1	1	1	80	1	1	1	1	1	70
1499	20150526	G	6	2	12	2	42	3	1	1	1	1	1	90	1	1	1	1	1	.
1500	.	G	6	1	12	2	46	3	1	1	1	1	1	100	1	1	1	1	1	100
1501	20150526	G	6	1	12	2	45	3	1	1	1	1	1	.	1	1	1	1	1	.
1502	20150526	G	6	1	12	2	45	3	1	1	1	1	2	.	1	1	1	1	1	.
1503	20150526	G	6	2	12	2	43	4	1	1	1	1	1	98	1	1	1	1	1	90
1504	20150527	G	6	1	12	1	26	4	1	1	1	1	1	50	1	1	1	1	1	80
1505	20150526	G	6	1	12	2	72	2	2	1	1	2	2	.	1	1	2	1	1	.
1506	20150527	G	6	2	12	2	41	3	1	1	1	1	1	85	.	.	.	.	.	.
1507	20150526	G	6	1	12	2	34	3	1	1	1	1	1	100	1	1	1	1	1	100
1508	20150527	G	6	1	12	2	48	3	1	1	1	1	1	80	1	1	1	1	1	96
1509	20150527	G	6	1	12	1	41	3	1	1	1	2	1	95	1	1	1	1	1	100
1510	.	G	.	1	7	1	43	3	1	1	1	1	1	20	1	2	1	1	1	20
1511	.	G	.	2	7	2	44	2	2	1	1	3	2	.	1	1	1	2	1	.
1512	.	G	.	1	8	2	38	3	1	1	1	2	1	90	1	1	1	1	1	95
1513	.	G	.	2	8	1	53	3	1	1	1	1	1	80	1	1	1	1	1	90
1514	20150521	G	.	1	8	.	.	.	1	1	1	1	1	95	1	1	1	1	1	.
1515	20150522	G	.	1	9	2	.	3	1	1	1	2	1	.	1	1	1	2	1	95
1516	.	G	.	2	9	2	35	4	1	1	1	1	1	90	1	1	1	1	1	90
1517	.	G	.	1	9	1	45	3	1	1	1	2	1	90	1	1	2	1	1	90
1518	.	G	.	1	9	2	50	2	1	1	1	1	1	100	1	1	1	1	1	100
1519	20150519	G	.	2	10	2	48	4	1	1	1	1	1	93	1	1	1	1	1	89
1520	.	G	.	1	12	2	34	3	1	1	1	1	1	100	1	1	1	1	1	100
1521	.	G	.	1	11	2	45	5	1	1	1	2	1	80	1	1	1	1	.	90
1522	.	G	.	1	12	.	.	.	.	.	.	.	.	.	.	.	.	.	.	.
1523	.	G	.	2	12	2	52	3	1	1	1	1	1	100	1	1	1	1	1	100
1524	20150521	H	1	1	7	2	34	3	1	1	1	2	2	70	1	1	1	1	1	50
1525	20150528	H	1	1	7	2	33	3	1	1	1	1	1	65	1	1	1	2	1	65
1526	20150521	H	1	1	7	2	41	3	1	1	1	1	1	90	1	1	1	1	1	80
1527	20150521	H	1	2	7	2	35	3	1	1	1	2	2	80	1	1	1	1	1	100
1528	.	H	1	1	7	1	45	4	1	1	1	1	1	80	1	1	1	1	1	80
1529	20150525	H	1	1	7	2	34	3	1	1	1	1	1	90	1	1	1	2	1	90
1530	20150521	H	1	2	7	2	47	4	1	1	1	1	1	80	1	1	1	1	1	100
1531	20150521	H	1	1	7	2	39	4	1	1	1	1	1	80	1	1	1	2	3	100
1532	20150521	H	1	1	7	2	50	3	1	1	1	1	1	80	1	1	1	1	1	80
1533	20150521	H	1	2	7	2	40	3	1	1	1	2	1	70	1	1	1	1	1	60
1534	20150521	H	1	1	7	2	42	4	1	1	1	1	1	100	1	1	1	1	1	100
1535	20150521	H	1	2	7	2	32	4	1	1	1	1	1	100	1	1	1	1	1	95
1536	20150521	H	1	2	7	2	40	3	1	1	1	1	1	75	1	1	1	1	1	100
1537	20150521	H	1	2	7	2	31	3	1	1	1	1	1	80	1	1	1	1	1	100
1538	20150521	H	1	1	7	2	34	3	1	1	1	2	1	60	1	1	1	1	1	80
1539	20150522	H	1	1	7	2	40	4	1	1	2	3	3	55	1	1	1	2	2	70
1540	20150522	H	1	2	7	2	40	4	1	1	1	1	1	90	1	1	1	1	1	95
1541	.	H	1	2	7	2	37	4	1	1	1	1	1	90	1	1	1	1	1	100
1542	20150525	H	1	.	7	2	32	3	1	1	1	1	2	80	1	2	2	1	1	100
1543	.	H	2	2	8	2	42	3	1	1	1	2	2	80	1	1	1	1	1	95
1544	.	H	2	1	8	2	41	3	1	1	1	1	2	80	1	1	1	1	1	90
1545	20150521	H	2	1	8	1	39	4	1	1	1	2	1	90	1	1	1	2	1	90
1546	20150521	H	2	2	8	2	34	3	1	1	1	2	2	50	1	1	1	1	2	40
1547	20150524	H	2	2	8	1	44	3	1	1	1	1	1	96	1	1	1	1	2	80
1548	20150521	H	2	1	8	2	35	3	1	1	1	2	2	80	1	1	1	1	1	90
1549	.	H	2	1	8	1	65	3	1	1	1	1	1	90	1	1	1	1	1	95
1550	20150527	H	2	2	8	2	41	4	1	1	1	1	1	90	1	1	1	1	1	90
1551	20150521	H	2	1	9	2	35	4	1	1	1	1	1	100	1	1	1	1	1	100
1552	20150522	H	2	1	8	2	39	3	1	1	1	1	1	85	1	1	1	1	1	100
1553	20150521	H	2	2	8	2	37	4	1	1	1	1	1	50	1	1	1	1	1	80
1554	20150521	H	2	1	8	2	43	3	1	1	1	1	2	70	1	1	1	1	2	100
1555	20150522	H	2	1	8	1	41	3	1	1	1	2	1	70	1	1	2	2	1	95
1556	20150525	H	2	2	8	2	45	4	1	1	1	2	1	100	1	1	2	1	1	.
1557	20150521	H	2	1	8	2	34	4	1	1	1	1	1	85	1	1	1	1	1	73
1558	20150520	H	2	1	8	2	35	3	1	1	1	1	1	80	1	1	1	1	1	90
1559	.	H	2	2	8	2	29	3	1	1	1	1	1	89	1	1	1	1	1	80
1560	20150521	H	2	2	8	2	41	4	1	1	2	2	2	70	1	1	1	3	1	60
1561	.	H	2	1	8	1	74	1	4	1	1	1	1	60	1	1	1	1	1	.
1562	.	H	2	1	8	2	41	3	1	1	1	1	2	80	1	2	1	1	1	90
1563	20150521	H	3	1	9	2	33	2	1	1	2	1	2	60	1	1	1	1	2	50
1564	20150521	H	3	2	9	2	46	3	1	1	1	1	1	90	1	1	1	1	1	90
1565	20150521	H	3	1	9	2	39	4	1	1	1	1	1	80	1	1	1	2	2	90
1566	20150526	H	3	1	9	2	32	1	1	1	1	1	1	90	1	1	1	1	2	100
1567	20150522	H	3	2	9	2	45	3	1	1	1	1	1	80	1	1	1	1	1	80
1568	20150526	H	3	2	9	2	36	3	1	1	1	1	1	90	1	1	1	2	1	100
1569	20150522	H	3	1	9	2	42	4	1	1	1	1	1	85	1	1	1	1	1	100
1570	20150521	H	3	2	9	2	45	3	1	1	1	1	1	90	1	1	1	1	1	80
1571	20150521	H	3	1	9	2	46	4	1	1	1	1	1	80	1	1	1	1	1	80
1572	20150521	H	3	2	9	2	50	3	1	1	1	1	1	80	1	1	1	1	1	80
1573	.	H	3	2	9	1	50	2	1	1	1	1	1	80	1	1	1	1	1	90
1574	20150521	H	4	2	10	2	49	3	1	1	1	1	1	70	1	1	1	1	1	70
1575	20150521	H	4	1	10	1	46	.	1	1	1	1	1	90	1	1	1	1	2	90
1576	20150527	H	4	1	10	2	41	1	1	1	2	2	1	95	1	1	1	2	1	95
1577	20150521	H	4	2	10	2	.	4	1	1	1	1	1	80	1	1	1	1	1	95
1578	20150526	H	4	1	10	2	40	3	2	1	1	1	2	70	1	1	1	2	2	80
1579	.	H	4	1	10	2	41	3	1	1	1	2	1	70	1	1	1	1	1	90
1580	20150521	H	4	2	10	2	42	3	1	1	1	1	1	70	1	1	1	1	1	90
1581	20150521	H	4	1	10	2	38	4	1	1	1	1	1	80	1	1	1	1	2	95
1582	20150521	H	4	2	10	2	.	.	1	.	.	.	.	90	1	1	1	1	1	90
1583	20150526	H	4	1	10	.	65	1	.	.	.	.	.	75	3	3	1	2	2	70
1584	20150522	H	4	1	10	2	37	4	1	1	2	2	2	95	1	3	2	2	2	95
1585	20150521	H	4	1	10	2	45	4	1	1	1	1	1	95	1	1	1	1	1	90
1586	20150521	H	4	1	10	2	77	1	1	1	1	1	1	85	1	1	1	1	1	95
1587	20150521	H	4	2	10	2	40	3	1	1	1	1	1	50	1	1	1	1	1	50
1588	20150527	H	4	2	10	1	42	4	1	1	2	2	1	100	1	1	1	1	1	100
1589	20150521	H	4	2	10	2	40	4	1	1	1	1	1	85	1	1	1	1	1	85
1590	20150522	H	4	1	10	2	40	3	1	1	1	1	1	95	1	1	1	1	1	90
1591	20150527	H	4	2	10	2	40	3	1	1	1	1	1	90	1	1	1	1	1	90
1592	20150526	H	4	1	10	2	37	4	1	1	1	1	1	90	1	1	1	1	1	98
1593	20150526	H	4	1	10	2	46	3	1	1	1	1	1	70	1	1	1	1	1	20
1594	20150526	H	4	2	11	2	43	4	1	1	1	2	2	90	2	2	2	2	1	70
1595	20150521	H	5	1	11	1	.	3	1	1	1	1	1	100	1	1	1	1	1	100
1596	20150525	H	5	1	10	2	45	3	1	1	2	2	2	75	1	1	1	1	1	100
1597	20150521	H	5	1	11	2	38	4	1	1	1	1	1	95	1	1	1	1	1	85
1598	20150526	H	5	1	11	2	41	4	1	1	1	1	1	85	1	1	2	2	2	50
1599	20150521	H	5	2	11	2	33	2	1	1	2	1	2	60	1	1	1	1	2	90
1600	20150521	H	5	1	11	2	55	3	1	1	1	1	1	80	1	1	1	1	1	100
1601	.	H	5	2	11	2	51	3	1	1	1	2	1	90	1	1	1	1	1	95
1602	20150523	H	5	1	11	1	51	3	1	1	1	1	1	90	1	1	1	1	1	90
1603	20150521	H	5	2	11	2	46	4	1	1	1	1	1	70	1	1	1	1	1	70
1604	20150521	H	5	1	11	2	38	4	1	1	1	1	1	80	1	1	1	1	2	90
1605	20150522	H	5	2	11	2	38	3	1	1	1	2	2	90	1	1	1	2	1	80
1606	20150525	H	5	1	11	2	40	4	1	1	1	1	1	90	1	1	1	1	1	90
1607	20150521	H	5	2	11	2	39	4	1	1	1	1	1	90	1	1	1	1	1	90
1608	20150521	H	5	2	11	2	53	3	1	1	2	3	4	60	1	1	1	2	2	85
1609	20150521	H	5	1	11	2	43	3	1	1	1	1	1	92	1	1	1	1	1	96
1610	20150525	H	5	1	11	1	48	3	1	1	1	1	1	90	1	1	1	1	1	85
1611	20150527	H	5	2	11	1	40	4	1	1	1	1	1	97	1	1	1	1	1	95
1612	.	H	5	1	11	2	39	3	1	1	2	2	2	90	1	1	1	1	1	100
1613	20150521	H	5	1	10	2	34	4	1	1	1	1	1	85	1	1	1	1	1	83
1614	20150521	H	5	1	11	2	43	4	1	1	1	1	1	85	1	1	1	1	1	85
1615	20150526	H	5	1	11	1	39	3	1	1	1	1	1	85	1	1	1	1	1	80
1616	20150521	H	5	2	10	2	43	3	1	1	1	1	1	90	1	1	1	1	1	95
1617	.	H	5	2	11	2	41	3	1	1	1	1	2	60	1	1	1	1	1	60
1618	20150521	H	6	2	12	2	53	4	1	1	1	1	1	70	1	1	1	1	1	63
1619	20150521	H	6	2	12	2	53	4	1	1	1	1	1	80	1	1	1	1	1	90
1620	20150527	H	6	1	12	2	38	4	1	1	1	1	1	80	1	1	1	1	1	96
1621	20150521	H	6	1	12	2	41	3	1	1	1	1	1	60	1	1	1	1	2	60
1622	20150521	H	6	1	12	2	41	3	1	1	1	2	1	80	1	1	1	1	1	80
1623	20150526	H	6	1	12	2	47	4	1	1	1	1	1	90	1	1	1	1	1	75
1624	20150521	H	6	2	12	2	42	3	1	1	1	1	1	70	1	1	1	1	1	95
1625	20150521	H	6	1	12	2	46	3	1	1	1	1	1	90	1	1	1	1	1	100
1626	20150521	H	6	2	12	2	41	1	1	1	1	2	1	90	1	1	1	2	2	83
1627	20150522	H	6	2	12	2	41	4	1	1	1	2	2	70	1	1	1	1	1	50
1628	20150521	H	6	2	12	2	45	3	1	1	1	1	1	90	1	1	1	1	1	90
1629	.	H	6	1	12	2	44	4	1	1	1	1	1	90	1	1	1	1	1	70
1630	20150528	H	6	2	12	2	47	3	1	1	1	1	1	85	1	1	1	2	3	70
1631	20150522	H	6	2	12	1	43	3	1	1	1	2	1	80	1	1	1	1	2	80
1632	.	H	6	2	12	1	45	3	1	1	1	1	1	80	1	1	1	2	1	80
1633	20150526	H	6	2	12	2	48	3	1	1	1	1	1	70	1	1	1	1	1	60
1634	20150521	H	6	2	11	2	34	4	1	1	1	1	1	85	1	1	1	1	1	85
1635	20150521	H	6	2	12	2	41	4	1	1	1	2	3	80	1	1	1	2	2	70
1636	20150520	H	6	1	12	2	43	4	1	1	1	2	1	45	1	1	1	1	1	100
1637	20150520	H	6	2	12	2	42	4	1	1	1	1	1	90	1	1	1	1	1	85
1638	20150521	H	6	1	12	2	41	3	1	1	1	1	1	99	1	1	1	1	1	100
1639	20150528	H	6	1	12	2	51	4	1	1	1	2	1	90	1	1	1	1	1	90
1640	20150528	H	6	2	12	2	44	4	1	1	1	1	1	85	1	1	1	1	1	80
1641	20150528	H	6	1	12	2	43	3	1	1	1	1	1	90	2	1	2	1	1	70
1642	.	I	1	2	7	.	.	.	1	1	1	1	1	80	1	1	1	1	1	80
1643	20150603	I	1	2	7	2	37	4	1	1	1	1	1	100	1	1	1	1	1	100
1644	20150603	I	1	2	7	2	39	3	1	1	1	1	1	80	1	1	1	1	1	100
1645	.	I	1	1	7	2	34	3	1	1	1	1	1	70	1	1	1	1	1	80
1646	20150603	I	1	1	7	2	32	4	1	1	1	1	1	70	1	1	1	1	.	80
1647	20150604	I	1	1	7	2	34	4	1	1	1	2	1	60	1	1	1	1	1	100
1648	20150604	I	1	1	7	2	40	4	1	1	1	2	1	90	1	1	1	1	1	90
1649	20150603	I	1	1	8	2	41	4	1	1	1	1	1	90	1	2	2	1	1	95
1650	20150605	I	1	1	7	2	36	4	1	1	1	1	1	100	1	1	1	1	1	100
1651	20150603	I	1	1	7	2	40	4	1	1	1	1	2	80	1	1	1	1	1	95
1652	20150603	I	1	1	7	2	35	3	1	1	1	1	1	70	1	1	1	1	1	100
1653	20150604	I	1	2	7	2	40	4	1	1	1	1	1	80	1	1	1	1	1	90
1654	20150603	I	1	2	7	2	41	4	1	1	1	1	1	85	1	1	1	1	1	90
1655	20150603	I	1	2	7	2	36	4	1	1	1	1	1	100	1	1	1	2	1	80
1656	20150603	I	1	2	7	2	36	4	1	1	1	1	1	80	1	1	1	1	1	100
1657	20150603	I	1	1	7	2	39	4	1	1	1	1	1	90	1	1	1	1	1	100
1658	20150603	I	1	2	7	2	35	3	1	1	1	2	1	90	1	1	1	1	1	100
1659	20150603	I	1	1	7	2	31	3	1	1	1	1	1	90	1	1	1	1	1	90
1660	20150605	I	1	2	7	2	32	3	1	1	1	1	1	100	1	1	1	1	1	100
1661	20150609	I	1	1	7	2	41	3	1	1	1	1	1	90	1	1	1	1	1	90
1662	20150603	I	1	2	7	2	36	3	1	1	1	1	2	70	1	1	1	1	2	95
1663	20150603	I	1	1	7	2	41	4	1	1	1	1	1	100	1	1	1	1	1	100
1664	.	I	1	2	7	1	34	3	1	1	1	1	1	90	1	1	1	1	1	100
1665	20150603	I	1	2	7	2	32	4	1	1	1	1	1	.	1	1	1	1	1	.
1666	20150604	I	1	1	8	1	33	4	1	1	1	1	2	90	1	1	1	1	2	85
1667	.	I	1	1	7	1	37	4	1	1	1	1	1	100	1	1	1	1	1	100
1668	20150603	I	1	2	7	2	36	3	1	1	1	2	1	80	1	1	1	1	1	100
1669	20150603	I	1	1	7	2	35	4	1	1	1	1	1	.	1	1	1	1	1	100
1670	20150603	I	1	2	7	2	36	4	1	1	1	1	1	95	1	1	1	1	1	90
1671	20150603	I	1	1	7	2	38	4	1	1	1	1	1	85	1	1	1	1	1	100
1672	20150603	I	1	1	7	2	34	4	1	1	1	1	1	80	1	1	1	1	1	80
1673	20150603	I	1	1	7	2	38	3	1	1	1	2	1	80	1	1	1	1	1	90
1674	20150604	I	1	1	7	2	43	4	1	1	1	1	1	90	1	1	1	1	1	90
1675	20150603	I	1	2	7	1	42	5	1	1	1	1	1	80	1	1	1	1	1	80
1676	20150603	I	1	1	7	2	38	4	1	1	1	2	1	90	1	1	1	2	1	85
1677	.	I	1	1	7	.	.	.	1	1	1	1	1	100	1	1	1	1	1	100
1678	20150604	I	1	2	7	2	34	4	1	1	1	1	1	80	1	1	1	1	1	100
1679	20150603	I	1	2	7	2	41	4	1	1	1	1	1	75	1	1	1	1	1	90
1680	20150603	I	1	2	7	2	47	4	1	1	1	1	1	99	1	1	1	1	1	100
1681	20150603	I	1	1	7	1	41	3	1	1	1	1	1	95	1	1	1	1	1	95
1682	20150603	I	1	1	7	2	43	3	1	1	1	2	1	.	1	1	1	1	1	.
1683	20150604	I	1	2	6	2	42	4	1	1	1	1	2	90	1	1	1	1	1	100
1684	.	I	1	2	7	2	45	2	1	1	1	2	1	80	1	1	1	1	1	95
1685	20150603	I	1	1	7	2	37	4	1	1	1	1	1	90	1	1	1	1	1	95
1686	20150603	I	1	1	7	2	42	3	1	1	1	1	1	80	1	1	1	1	1	.
1687	20150603	I	1	2	7	1	56	3	1	1	1	1	1	100	1	1	1	1	1	100
1688	20150605	I	1	2	7	2	33	4	1	1	1	1	1	95	1	1	1	1	1	70
1689	20150603	I	1	1	7	2	33	4	1	1	1	1	1	.	1	1	1	1	1	100
1690	20150603	I	1	2	7	2	40	4	1	1	1	1	1	90	1	1	1	1	1	100
1691	20150603	I	1	2	7	2	30	3	1	1	1	1	2	100	1	1	1	1	1	100
1692	.	I	1	2	7	2	43	3	1	1	1	1	1	100	1	1	1	1	1	100
1693	.	I	1	2	7	2	37	4	1	1	1	1	1	85	1	1	1	1	1	90
1694	.	I	1	1	7	2	35	4	1	1	1	1	1	100	1	1	1	1	1	100
1695	20150603	I	1	2	7	2	34	4	1	1	1	1	1	80	1	1	1	1	2	100
1696	20150603	I	1	1	7	2	38	4	1	1	1	1	1	100	1	1	1	1	1	100
1697	20150603	I	2	2	8	2	36	3	1	1	1	1	1	75	1	1	1	1	1	80
1698	20150604	I	2	1	8	1	49	3	1	1	1	2	1	90	1	1	1	2	1	90
1699	20150603	I	2	1	8	2	39	4	1	1	1	1	1	90	1	1	1	1	1	85
1700	20150603	I	2	1	8	2	37	4	1	1	1	1	2	84	1	1	1	1	2	87
1701	20150604	I	2	1	8	2	40	4	1	1	1	1	1	100	1	1	1	1	1	100
1702	.	I	2	1	8	2	37	4	1	1	1	1	1	90	1	1	1	1	1	95
1703	20150604	I	2	1	8	2	36	4	1	1	1	1	1	80	2	2	2	2	1	.
1704	20150603	I	2	1	8	1	45	4	1	1	1	1	1	95	1	1	1	1	1	97
1705	20150603	I	2	1	8	2	38	4	1	1	1	1	1	90	1	1	1	1	1	100
1706	20150603	I	2	2	8	2	45	3	1	1	1	1	1	95	1	1	1	1	1	100
1707	20150603	I	2	2	8	2	36	3	1	1	1	1	1	100	1	1	1	1	1	100
1708	20150603	I	2	2	8	2	42	3	5	2	4	3	1	80	1	1	1	1	1	100
1709	.	I	2	2	8	1	47	2	1	1	1	1	1	.	1	1	1	1	1	.
1710	20150603	I	2	2	8	2	38	4	1	1	1	1	1	85	1	1	1	1	1	80
1711	20150603	I	2	1	8	2	31	4	1	1	1	1	1	90	1	1	1	1	1	90
1712	20150604	I	2	2	8	2	38	4	1	1	1	1	1	100	1	1	1	1	1	100
1713	.	I	2	2	8	2	33	5	1	1	1	1	1	100	1	1	1	1	1	100
1714	20150603	I	2	2	8	1	48	4	1	1	1	1	1	90	1	2	1	1	1	100
1715	20150603	I	2	2	8	2	40	3	1	1	1	1	1	100	1	1	1	1	2	90
1716	20150603	I	2	2	11	2	36	4	1	1	1	1	1	93	1	1	1	1	1	.
1717	.	I	2	2	8	2	39	4	1	1	1	1	1	90	1	1	1	1	1	100
1718	20150603	I	2	1	8	2	43	4	1	1	1	1	1	90	1	1	1	1	1	80
1719	20150603	I	2	1	8	2	42	3	1	1	1	1	1	80	1	1	1	1	1	100
1720	20150603	I	2	2	8	2	40	3	1	1	1	1	1	85	1	1	.	1	1	95
1721	.	I	2	2	8	2	38	.	1	1	1	1	1	80	1	1	1	1	1	80
1722	20150604	I	2	2	8	2	43	3	1	1	1	1	1	85	1	1	1	1	1	95
1723	20150603	I	2	1	8	2	37	4	1	1	1	1	1	90	1	1	1	1	1	100
1724	.	I	2	1	8	2	36	3	1	1	1	1	1	70	1	1	1	1	1	100
1725	.	I	2	1	8	2	41	4	1	1	1	1	1	90	1	1	1	1	1	100
1726	20150603	I	2	2	8	2	35	4	1	1	1	1	1	80	1	1	1	1	1	90
1727	20150603	I	2	2	8	2	40	4	1	1	1	1	1	90	1	1	1	1	1	100
1728	20150603	I	2	2	8	2	31	3	1	1	1	1	1	90	1	1	1	1	1	95
1729	20150603	I	2	2	8	2	38	4	1	1	1	1	1	80	1	1	1	1	1	90
1730	20150603	I	2	1	8	2	38	4	1	1	1	1	1	90	1	1	1	1	1	100
1731	20150603	I	2	1	8	2	33	4	1	1	1	1	1	80	1	1	1	1	1	100
1732	20150604	I	2	2	8	2	47	3	1	1	1	2	1	95	1	1	1	2	1	100
1733	20150603	I	2	2	8	2	40	4	1	1	1	2	2	80	1	1	1	1	1	100
1734	20150603	I	2	1	8	2	42	3	1	1	1	1	1	60	1	1	1	1	1	80
1735	20150603	I	2	1	8	2	39	4	1	1	1	1	1	90	1	1	1	1	1	80
1736	20150603	I	2	2	8	2	40	3	1	1	1	1	1	100	1	1	1	1	1	80
1737	20150603	I	2	2	8	2	37	4	1	1	1	1	1	90	1	1	1	1	1	80
1738	20150603	I	2	2	8	2	41	3	1	1	1	1	1	100	1	1	1	1	1	100
1739	20150603	I	2	2	8	2	38	4	1	1	1	2	1	70	1	1	1	1	2	.
1740	20150603	I	2	1	8	2	35	4	1	1	1	1	1	100	1	1	1	1	1	100
1741	20150603	I	2	1	8	2	37	4	1	1	1	1	1	90	1	1	1	1	1	95
1742	20150603	I	2	2	8	2	34	3	1	1	1	1	1	100	1	1	1	1	1	100
1743	20150603	I	2	2	7	2	36	4	1	1	1	1	1	85	1	1	1	1	1	90
1744	20150603	I	2	1	8	2	43	3	1	1	1	1	1	90	1	1	1	1	1	90
1745	20150603	I	2	2	8	2	38	4	1	1	1	1	1	85	1	1	1	1	1	85
1746	20150603	I	2	1	8	2	38	4	1	1	1	1	1	80	1	1	1	1	1	100
1747	20150603	I	2	1	8	2	45	4	1	1	1	1	2	70	1	1	1	1	1	90
1748	.	I	2	1	8	1	45	3	1	1	1	1	1	80	2	1	3	1	1	100
1749	20150603	I	2	2	8	2	40	4	1	1	1	2	1	70	1	1	1	2	1	75
1750	20150603	I	2	2	8	2	37	4	1	1	1	1	2	80	1	1	1	1	1	90
1751	20150603	I	2	2	8	2	39	4	1	1	1	1	1	90	1	1	1	1	2	95
1752	.	I	2	1	8	1	34	4	1	1	1	1	1	80	1	1	1	1	1	80
1753	20150603	I	2	1	8	2	41	4	1	1	1	1	1	100	1	1	1	1	1	100
1754	20150603	I	2	2	8	2	36	3	1	1	1	1	1	80	1	1	1	1	1	95
1755	20150604	I	2	2	8	2	36	3	1	1	1	1	1	99	1	1	1	1	1	99
1756	20150603	I	2	1	8	1	45	4	1	1	1	1	1	80	1	1	1	1	1	95
1757	.	I	3	2	9	2	30	3	1	1	1	1	1	100	1	1	1	1	1	95
1758	20150604	I	3	2	9	2	42	4	1	1	1	1	1	70	1	1	1	2	1	80
1759	20150603	I	3	2	9	2	40	3	1	1	1	1	1	85	1	1	1	1	1	90
1760	20150603	I	3	1	9	2	34	3	1	1	1	1	1	100	1	1	1	1	1	100
1761	20150605	I	3	1	9	2	36	4	1	1	1	1	1	85	1	1	1	1	1	80
1762	20150603	I	3	2	9	1	43	4	1	1	1	1	1	95	1	1	1	1	1	95
1763	20150603	I	3	1	9	2	41	4	1	1	1	1	1	75	1	1	1	1	1	80
1764	20150603	I	3	1	9	2	38	3	1	1	1	1	1	80	1	1	1	1	1	80
1765	20150603	I	3	2	9	2	40	3	1	1	1	1	1	80	1	1	1	1	2	70
1766	20150603	I	3	2	9	2	43	4	1	1	1	2	1	80	1	1	1	1	1	100
1767	.	I	3	1	9	2	45	3	1	1	1	1	1	90	1	1	1	1	1	100
1768	20150603	I	3	1	9	2	38	4	1	1	1	1	1	75	1	1	1	1	1	80
1769	20150604	I	3	2	9	2	36	3	1	1	1	1	1	100	1	1	1	1	1	100
1770	20150603	I	3	1	9	2	37	4	1	1	1	1	1	100	2	1	1	2	3	40
1771	20150602	I	3	2	9	.	.	.	1	1	1	1	1	100	1	1	1	1	1	100
1772	20150603	I	3	1	9	2	38	3	1	1	1	1	1	97	1	1	1	1	1	95
1773	.	I	3	2	9	1	47	2	1	1	1	1	1	100	1	1	1	1	1	100
1774	.	I	3	1	9	2	41	4	1	1	1	1	1	100	1	1	1	1	1	100
1775	20150603	I	3	2	9	2	35	3	1	1	1	1	1	95	1	1	1	1	1	100
1776	20150604	I	3	1	9	2	31	3	1	1	1	1	1	100	1	1	1	1	1	100
1777	20150604	I	3	1	9	2	37	4	1	1	1	2	1	70	1	1	1	1	1	90
1778	20150603	I	3	1	9	2	43	4	1	1	1	1	1	80	1	1	1	2	1	90
1779	20150603	I	3	2	9	2	40	4	1	1	1	1	1	98	1	1	1	1	1	100
1780	20150603	I	3	2	9	2	46	4	1	1	1	1	1	100	1	1	1	1	1	60
1781	20150603	I	3	2	9	2	32	3	1	1	1	1	2	100	1	1	1	1	1	100
1782	20150604	I	3	1	9	2	37	4	1	1	1	1	1	80	1	1	1	1	1	90
1783	20150603	I	3	1	9	2	35	4	1	1	1	2	1	90	1	1	1	2	1	90
1784	20150603	I	3	1	9	2	39	4	1	1	1	1	1	85	1	1	1	1	1	90
1785	20150603	I	3	2	9	1	37	3	1	1	1	1	1	90	1	1	1	1	1	99
1786	20150608	I	3	1	9	2	46	3	1	1	1	1	1	100	1	1	1	1	1	100
1787	20150603	I	3	2	9	2	40	4	1	1	1	1	1	100	1	1	1	1	1	100
1788	20150603	I	3	1	9	2	34	4	1	1	1	1	1	100	1	1	1	1	1	95
1789	20150603	I	3	2	9	2	40	4	1	1	1	1	2	80	1	1	1	1	1	90
1790	20150603	I	3	1	9	2	40	4	1	1	1	1	1	85	1	1	1	1	1	90
1791	20150603	I	3	1	9	2	41	4	1	1	1	1	1	85	1	1	1	2	1	95
1792	20150607	I	3	2	9	1	48	3	1	1	1	1	1	90	1	1	1	1	1	90
1793	20150603	I	3	2	9	2	44	4	1	1	1	1	1	98	1	1	1	1	1	95
1794	.	I	3	1	9	1	38	4	1	1	1	1	1	100	1	1	1	1	1	100
1795	20150603	I	3	1	9	2	43	4	1	1	1	1	1	90	1	1	1	1	1	100
1796	.	I	3	2	9	2	41	4	1	1	1	1	1	100	1	1	1	1	1	100
1797	20150603	I	3	1	9	1	48	2	1	1	1	1	2	90	1	1	1	1	2	.
1798	20150603	I	3	1	9	2	36	3	1	1	1	1	2	70	1	1	1	1	2	80
1799	20150603	I	3	1	9	1	44	3	1	1	1	1	1	100	1	1	1	1	1	100
1800	20150604	I	3	2	9	2	43	3	1	1	1	1	1	70	1	1	1	1	1	60
1801	20150603	I	4	2	10	2	35	3	1	1	1	1	1	100	1	1	1	1	1	100
1802	20150603	I	4	2	10	2	36	4	1	1	1	1	1	85	1	1	1	1	1	80
1803	20150605	I	4	1	10	2	43	4	1	1	1	2	2	80	1	1	1	1	1	95
1804	20150604	I	4	2	10	2	41	4	1	1	1	1	1	95	1	1	1	1	1	92
1805	20150609	I	4	1	10	2	38	4	1	1	1	1	1	90	1	1	1	1	2	80
1806	20150604	I	4	2	10	2	40	4	1	1	1	1	1	90	1	1	1	1	1	85
1807	20150604	I	4	1	10	1	45	4	1	1	1	1	1	95	1	1	1	1	1	100
1808	20150604	I	4	1	10	2	43	3	1	1	1	2	1	70	1	1	1	1	1	80
1809	20150604	I	4	2	10	2	42	4	1	1	1	1	1	80	1	1	1	1	1	80
1810	20150604	I	4	1	10	2	43	3	1	1	1	1	1	90	1	1	1	1	1	95
1811	20150605	I	4	1	10	2	47	3	1	1	1	1	1	80	1	1	1	1	1	80
1812	20150603	I	4	1	10	2	42	3	1	1	1	1	2	85	1	1	1	1	1	95
1813	20150603	I	4	2	10	2	41	4	1	1	1	1	1	80	1	1	1	1	1	90
1814	20150605	I	4	2	10	2	36	3	1	1	1	1	1	100	1	1	1	1	1	100
1815	20150603	I	4	1	10	2	36	4	1	1	1	1	1	90	1	1	1	1	1	90
1816	.	I	4	2	10	2	36	3	1	1	1	1	1	80	1	1	1	1	1	80
1817	20150604	I	4	1	10	2	41	3	1	1	1	1	1	70	1	1	1	1	1	95
1818	20150603	I	4	2	10	2	37	4	1	1	1	1	1	95	1	1	1	1	1	90
1819	20150604	I	4	2	10	2	40	4	1	1	1	2	2	85	1	1	1	2	2	90
1820	.	I	4	2	10	2	34	4	1	1	1	1	1	85	2	1	1	2	1	90
1821	20150603	I	4	1	10	2	37	5	1	1	1	1	2	80	1	1	1	1	1	80
1822	20150603	I	4	1	10	2	37	4	1	1	1	2	1	60	1	1	1	1	1	60
1823	20150605	I	4	1	10	1	40	4	1	1	1	1	1	80	1	1	1	2	1	60
1824	20150604	I	4	2	10	1	48	4	1	1	1	1	1	95	1	1	1	1	1	95
1825	20150603	I	4	2	10	2	45	4	1	1	1	1	1	90	1	1	1	2	1	45
1826	20150604	I	4	1	10	2	46	3	1	1	1	1	1	80	1	1	1	1	1	.
1827	20150603	I	4	1	10	2	47	3	1	1	1	1	1	95	1	1	1	2	2	95
1828	.	I	4	1	10	2	37	3	1	1	1	1	1	95	1	1	1	1	1	70
1829	20150607	I	4	1	10	2	39	4	1	1	1	1	1	100	1	1	1	1	1	100
1830	20150603	I	4	2	10	2	43	4	1	1	1	1	1	90	1	1	1	1	1	70
1831	20150607	I	4	2	10	2	40	4	1	1	1	1	1	92	1	1	1	2	1	90
1832	20150604	I	4	2	10	2	38	3	1	1	1	1	1	93	1	1	1	1	1	95
1833	20150603	I	4	1	10	2	47	3	1	1	1	1	1	100	1	1	1	1	1	100
1834	20150604	I	4	1	10	2	43	4	1	1	1	1	1	90	1	1	1	1	1	90
1835	20150607	I	4	1	10	1	45	3	1	1	1	1	1	80	1	1	1	1	1	90
1836	20150604	I	4	1	10	2	43	3	1	1	1	1	1	90	1	1	1	1	1	90
1837	.	I	4	2	10	2	.	3	1	1	1	1	1	90	1	1	1	1	1	95
1838	20150603	I	4	1	10	2	45	4	1	1	1	1	1	80	1	1	1	1	1	70
1839	20150604	I	4	2	10	2	39	4	1	1	1	1	1	90	1	1	1	1	1	90
1840	20150603	I	4	2	10	2	37	3	4	3	4	4	2	40	1	1	1	1	1	100
1841	20150603	I	4	2	10	2	35	3	3	2	3	3	2	70	1	1	1	1	1	95
1842	20150603	I	4	2	10	2	44	4	1	1	1	1	1	100	1	1	1	1	1	100
1843	20150604	I	4	2	10	2	42	3	1	1	1	1	1	99	1	1	1	1	1	100
1844	20150604	I	4	1	10	2	38	4	1	1	1	1	1	100	1	1	1	1	1	100
1845	20150604	I	4	2	10	2	40	4	1	1	1	1	1	100	1	1	1	1	1	100
1846	20150607	I	4	1	10	1	39	4	1	1	1	1	1	100	1	1	1	1	1	100
1847	20150603	I	4	2	10	2	36	4	1	1	1	1	1	90	1	1	1	1	1	100
1848	.	I	4	1	10	2	43	4	1	1	1	2	1	75	1	1	1	2	1	75
1849	20150603	I	4	2	10	2	43	3	1	1	1	1	1	90	1	1	1	1	1	100
1850	20150604	I	4	2	10	2	43	3	1	1	1	1	1	70	1	1	1	1	1	75
1851	20150603	I	5	1	11	2	36	3	1	1	1	1	2	80	1	1	1	1	1	99
1852	20150603	I	5	2	11	2	37	4	1	1	1	1	1	90	1	1	1	1	1	80
1853	20150603	I	5	2	11	2	38	3	1	1	1	1	1	70	1	1	1	1	1	90
1854	20150603	I	5	1	11	2	38	4	1	1	1	1	1	85	1	1	1	1	1	95
1855	20150603	I	5	2	11	2	42	3	1	1	1	1	1	100	1	1	1	1	1	50
1856	20150604	I	5	1	11	1	47	3	1	1	1	1	1	90	1	1	1	1	1	70
1857	.	I	5	2	11	2	37	4	1	1	1	1	1	90	1	1	1	1	1	90
1858	20150604	I	5	1	11	2	34	4	1	1	1	1	1	80	1	1	1	1	1	100
1859	20150603	I	5	1	11	2	45	.	1	1	1	2	1	80	1	1	1	1	1	90
1860	20150604	I	5	1	11	2	40	3	1	1	1	1	1	90	1	1	1	1	1	90
1861	20150603	I	5	1	11	2	39	4	1	1	1	1	1	90	1	1	1	1	1	80
1862	20150604	I	5	1	11	2	45	3	1	1	1	1	1	80	1	1	1	1	2	80
1863	20150603	I	5	1	11	2	41	4	1	1	1	1	1	100	1	1	1	1	1	100
1864	20150603	I	5	2	11	2	44	3	1	1	1	1	1	100	1	1	1	1	1	95
1865	20150603	I	5	1	11	2	36	4	1	1	1	1	1	80	1	1	1	1	1	90
1866	20150605	I	5	1	11	2	42	4	1	1	1	1	1	90	1	1	1	1	1	95
1867	20150603	I	5	1	11	2	43	4	1	1	1	1	1	90	1	1	1	1	2	.
1868	.	I	5	2	11	2	41	3	1	1	1	1	2	90	1	1	1	1	1	95
1869	20150603	I	5	2	11	1	48	3	1	1	1	1	1	95	1	1	1	1	1	95
1870	20150603	I	5	2	11	1	45	4	1	1	1	1	1	80	1	1	1	1	1	80
1871	20150608	I	5	1	11	2	38	3	1	1	1	1	1	100	1	1	1	1	1	90
1872	20150608	I	5	1	11	2	43	4	1	1	1	1	2	80	1	1	1	1	1	90
1873	.	I	5	1	11	2	38	4	1	1	1	1	1	90	1	1	1	1	1	80
1874	20150607	I	5	2	11	2	39	3	1	1	1	2	2	80	1	1	1	1	1	99
1875	20150605	I	5	2	11	2	42	4	1	1	1	1	2	80	1	1	1	2	1	90
1876	20150607	I	5	1	11	1	42	5	1	1	1	1	1	80	1	1	1	2	1	90
1877	.	I	5	2	11	2	35	4	1	1	1	1	1	98	1	1	1	1	1	95
1878	20150607	I	5	1	11	2	.	4	1	1	1	1	1	.	1	1	1	1	1	95
1879	20150606	I	5	1	11	2	43	3	1	1	1	1	2	90	1	1	1	1	1	100
1880	20150608	I	5	2	11	2	38	3	1	1	1	1	1	90	1	1	1	1	1	90
1881	20150606	I	5	2	11	2	46	5	1	1	1	1	2	92	1	1	1	2	2	63
1882	20150607	I	5	1	11	1	43	3	1	1	1	2	1	75	1	1	1	2	1	75
1883	20150608	I	5	1	11	2	39	4	1	1	1	1	1	98	1	1	1	1	1	95
1884	20150607	I	5	2	11	2	37	3	1	1	1	1	1	100	1	1	1	1	1	100
1885	20150605	I	5	1	11	1	43	4	1	1	1	1	1	90	1	1	1	1	1	90
1886	20150607	I	5	1	11	2	41	.	1	1	1	1	2	90	1	1	1	1	2	85
1887	20150605	I	5	1	11	2	38	4	1	1	1	1	1	80	1	1	1	1	1	90
1888	20150607	I	5	1	11	1	39	3	1	1	1	1	1	95	1	1	1	1	1	80
1889	20150606	I	5	2	11	2	39	4	2	1	2	2	2	70	1	1	1	1	1	90
1890	20150607	I	5	1	11	2	36	4	1	1	1	1	1	80	1	1	1	1	1	70
1891	20150604	I	5	2	11	2	42	4	1	1	1	1	1	70	1	1	1	1	2	90
1892	20150603	I	5	1	11	1	44	3	1	1	1	1	1	85	1	1	1	1	1	90
1893	20150605	I	5	1	11	2	39	4	1	1	1	1	1	90	1	1	1	1	1	95
1894	20150604	I	5	1	11	2	47	4	1	1	1	1	1	100	1	1	1	1	1	100
1895	20150603	I	5	2	11	2	40	4	1	1	1	1	1	100	1	1	1	1	1	80
1896	20150604	I	5	2	11	2	37	4	1	1	1	1	1	70	1	1	1	1	1	.
1897	20150603	I	5	1	11	1	43	3	1	1	1	2	1	90	1	1	1	2	2	100
1898	20150604	I	5	1	11	2	40	4	1	1	1	1	1	99	1	1	1	1	1	95
1899	20150603	I	5	1	11	.	.	.	1	1	1	2	1	100	1	1	1	1	1	.
1900	20150604	I	5	1	11	1	40	4	1	1	1	1	1	90	1	1	1	1	1	99
1901	.	I	5	1	11	1	42	.	1	1	1	2	3	70	1	1	1	1	1	95
1902	20150603	I	5	1	11	2	40	4	1	1	1	1	1	90	1	1	1	1	1	99
1903	20150603	I	5	2	11	2	44	4	1	1	1	1	1	75	1	1	1	1	1	99
1904	20150605	I	5	2	11	.	41	3	1	1	1	1	1	80	1	1	1	1	1	55
1905	20150603	I	5	1	11	2	38	3	1	1	1	2	1	90	1	1	1	1	1	90
1906	20150603	I	5	2	11	2	39	3	1	1	1	2	1	75	1	1	1	1	1	85
1907	.	I	5	1	11	1	35	3	1	1	1	1	1	95	1	1	1	1	1	95
1908	20150603	I	5	2	11	2	49	2	2	1	1	2	1	70	1	1	1	1	1	100
1909	20150603	I	5	1	11	2	39	4	1	1	1	1	1	80	1	1	1	1	1	75
1910	20150603	I	5	1	11	2	37	3	1	1	1	1	1	100	1	1	1	1	1	100
1911	20150603	I	5	2	11	2	34	3	1	1	1	1	1	70	1	1	1	1	1	95
1912	20150603	I	6	2	12	2	40	3	1	1	1	1	1	90	1	1	1	1	1	80
1913	20150603	I	6	2	12	2	39	4	1	1	1	1	1	90	1	1	1	1	1	90
1914	20150603	I	6	2	12	2	41	4	1	1	1	1	1	90	1	1	1	1	1	95
1915	.	I	6	1	12	2	.	3	1	1	1	1	1	.	1	1	1	1	1	60
1916	.	I	6	1	12	2	44	4	1	1	1	1	1	85	1	1	1	2	1	.
1917	20150603	I	6	1	12	2	38	4	1	1	1	1	1	99	1	1	1	1	1	99
1918	20150603	I	6	1	12	2	38	.	1	1	1	1	2	80	1	1	1	1	1	92
1919	.	I	6	1	12	2	42	.	1	1	1	1	1	.	1	1	1	1	1	100
1920	20150603	I	6	2	12	2	41	3	1	1	1	1	1	100	1	1	1	1	1	100
1921	20150603	I	6	2	12	1	48	3	1	1	1	2	1	100	1	1	1	1	1	100
1922	20150603	I	6	2	12	2	38	4	1	1	1	1	1	90	1	1	1	1	1	90
1923	.	I	6	2	12	2	38	4	1	1	1	1	1	80	1	1	1	1	1	90
1924	20150603	I	6	1	12	2	43	4	1	1	1	2	1	80	1	1	1	2	1	85
1925	20150603	I	6	1	12	2	40	4	1	1	1	1	1	90	1	1	1	2	1	80
1926	20150604	I	6	1	12	2	44	4	1	1	1	2	1	90	1	1	1	1	1	.
1927	20150603	I	6	1	12	2	36	4	1	1	1	1	1	95	1	1	1	1	1	80
1928	.	I	6	1	12	1	39	3	1	1	1	1	1	90	1	1	1	1	1	80
1929	20150604	I	6	1	12	2	42	4	2	1	2	2	1	.	1	1	1	1	1	99
1930	.	I	6	1	12	.	40	.	1	1	1	1	1	85	1	1	1	2	1	75
1931	20150602	I	6	1	12	1	44	3	1	1	1	1	1	100	1	1	1	1	1	100
1932	20150605	I	6	1	12	2	46	.	1	1	1	1	1	.	1	1	1	1	1	80
1933	20150603	I	6	2	12	2	39	4	1	1	1	1	1	80	1	1	1	1	1	83
1934	20150605	I	6	2	12	2	.	4	1	1	1	1	1	100	1	1	1	1	2	100
1935	20150604	I	6	2	12	2	44	4	1	1	1	1	1	90	1	1	1	1	1	90
1936	20150608	I	6	1	12	2	39	4	1	1	1	1	2	90	1	1	1	1	2	85
1937	20150604	I	6	1	12	2	60	2	2	1	2	3	1	80	2	1	2	2	1	85
1938	20150604	I	6	1	12	2	45	4	1	1	1	2	1	92	1	1	1	2	1	97
1939	20150605	I	6	1	12	2	41	3	1	1	1	1	1	97	1	1	1	1	1	100
1940	20150604	I	6	2	12	2	45	2	1	1	1	2	1	80	1	1	1	1	1	60
1941	20150607	I	6	1	12	2	37	3	1	1	1	1	1	90	1	1	1	1	1	80
1942	.	I	6	2	12	2	45	3	1	1	1	1	1	95	1	1	1	1	1	95
1943	20150607	I	6	1	12	2	42	3	1	1	1	1	2	80	1	1	1	1	1	95
1944	20150603	I	6	1	12	2	39	4	1	1	1	2	2	75	1	1	1	2	2	70
1945	20150604	I	6	1	12	2	42	3	1	1	1	1	1	99	1	1	1	1	1	100
1946	20150609	I	6	1	12	2	47	3	1	1	1	2	1	75	1	1	1	1	1	90
1947	20150603	I	6	2	12	2	43	4	1	1	1	1	1	90	1	1	1	1	1	95
1948	20150603	I	6	2	12	2	40	3	1	1	1	1	1	100	1	1	1	1	1	80
1949	20150604	I	6	1	12	2	41	3	1	1	1	1	1	100	1	1	1	1	1	100
1950	20150603	I	6	2	12	2	43	4	1	1	1	1	1	95	1	1	1	1	1	95
1951	20150607	I	6	1	12	2	39	4	1	1	1	1	1	100	1	1	1	1	1	100
1952	20150603	I	6	2	12	1	43	4	1	1	1	1	1	95	1	1	1	1	1	95
1953	20150604	I	6	2	12	2	43	3	1	1	1	1	1	.	1	1	1	1	1	45
1954	20150606	I	6	1	12	2	43	3	1	1	1	1	2	90	1	1	1	1	1	100
1955	20150604	I	6	1	12	2	43	4	1	1	1	1	1	80	2	1	2	1	1	60
1956	20150604	I	6	1	12	1	39	3	1	1	1	2	1	80	1	1	2	3	1	100
1957	20150603	I	6	1	12	2	46	3	1	1	1	1	1	90	1	1	1	1	1	85
1958	20150604	I	6	1	12	2	73	3	1	1	2	1	1	80	1	1	1	1	1	81
1959	20150603	I	6	1	12	2	45	3	1	1	1	1	1	100	1	1	1	1	1	100
1960	20150603	I	6	2	12	2	42	3	1	1	1	1	1	87	1	1	1	1	1	90
1961	.	I	6	2	12	2	43	3	1	1	1	1	1	60	1	1	1	1	1	80
1962	20150603	I	6	1	12	2	42	3	5	2	4	3	1	70	1	1	1	1	1	80
1963	20150603	I	6	1	12	2	47	4	2	1	1	2	1	70	1	1	1	1	1	80
1964	20150603	I	6	2	12	2	39	4	1	1	1	2	2	70	1	1	1	1	1	90
1965	20150603	I	6	2	12	2	43	3	1	1	1	1	1	100	1	1	1	1	1	100
1966	20150603	I	6	1	12	1	.	4	1	1	1	1	1	100	1	1	1	1	1	100
1967	20150603	I	6	2	11	2	40	3	1	1	1	2	1	61	1	1	1	1	1	61
1968	.	I	.	1	12	1	41	3	1	1	1	2	1	65	1	1	1	2	1	80
1969	20150521	J	1	1	7	2	37	4	1	1	2	2	1	70	1	1	1	1	1	100
1970	20150521	J	1	2	7	2	47	3	2	1	1	2	1	90	1	1	1	1	1	100
1971	.	J	1	2	7	2	27	3	1	1	1	1	1	80	1	1	1	1	1	80
1972	20150521	J	1	2	7	2	42	4	1	1	1	1	1	100	1	1	1	2	1	100
1973	20150522	J	1	2	7	.	.	.	.	.	.	.	.	90	1	1	1	1	1	100
1974	20150521	J	1	1	7	2	32	4	1	1	1	2	2	80	1	1	2	2	2	70
1975	20150521	J	1	1	7	2	37	4	1	1	1	1	1	80	1	1	1	1	1	90
1976	20150522	J	1	1	7	2	33	4	1	1	1	1	1	50	1	1	1	1	1	80
1977	20150521	J	1	2	7	2	36	4	1	1	1	1	1	80	1	1	1	1	1	90
1978	20150521	J	1	2	7	2	36	3	1	1	1	1	1	80	1	1	1	1	1	90
1979	20150521	J	1	1	7	2	41	4	1	1	1	1	1	90	1	1	1	1	1	100
1980	20150522	J	1	1	7	2	38	4	1	1	1	1	1	90	1	1	1	1	1	90
1981	20150521	J	1	2	7	2	37	5	1	1	1	1	1	90	1	1	1	1	2	80
1982	20150521	J	1	1	7	1	46	4	1	1	1	2	1	80	1	1	1	1	1	100
1983	.	J	1	2	7	1	44	4	1	1	1	1	1	100	1	1	1	1	1	100
1984	20150521	J	1	1	7	2	48	4	1	1	1	1	1	95	1	1	1	1	1	95
1985	20150521	J	1	1	7	1	37	3	2	1	1	1	1	100	1	1	1	1	1	100
1986	20150521	J	1	2	7	2	38	4	1	1	1	1	1	95	1	1	1	1	1	95
1987	20150522	J	1	1	7	2	30	4	1	1	1	1	1	90	1	1	1	1	1	90
1988	20150521	J	1	2	7	2	30	3	1	1	2	1	2	80	1	1	1	2	1	100
1989	20150526	J	1	1	7	2	33	3	1	1	1	1	1	90	1	1	1	1	1	100
1990	20150521	J	1	2	7	2	37	4	1	1	1	1	1	90	1	1	1	1	1	95
1991	20150521	J	1	1	7	2	31	3	1	1	1	1	1	100	1	1	1	1	1	100
1992	20150525	J	1	2	7	1	42	4	1	1	1	1	1	90	1	1	1	1	1	90
1993	20150522	J	1	1	7	2	37	4	1	1	1	1	1	100	1	1	1	1	1	100
1994	20150521	J	1	2	7	2	35	4	1	1	1	2	1	40	1	1	1	1	1	90
1995	20150521	J	1	2	7	2	41	3	1	1	1	1	1	90	1	1	1	1	1	90
1996	20150521	J	1	1	7	2	43	4	1	1	1	1	1	90	1	1	1	1	1	100
1997	20150528	J	2	1	8	2	38	4	1	1	1	1	1	90	1	1	1	1	1	100
1998	20150528	J	2	2	8	.	.	.	.	.	.	.	.	.	1	1	1	1	1	.
1999	20150529	J	2	2	8	2	30	4	1	1	1	1	1	100	1	1	1	1	1	100
[truncated: 495 more rows]

## Sheet: coding book
variables	description	ranges or code
ID	ID
surveydate	date of survey
school	school code
grade	school grade	1~6th
ban	the number of class
sex	sex of participant	1. male 2. female
age	age of participant
P_sex	sex of responding parent(guardian)	1. male 2. female
P_age	age of responding parent(guardian)
P_edu	education level of responding parent(guardian)	1. elementary school 2. middle school 3. high school 4. college or undergraduate 5. graduate school
S_Mo	mobility' of EQ-5D-Y of student	1 no problem 2 some problem 3. a lot of problem
S_Sc	looking after myself' of EQ-5D-Y of student	1 no problem 2 some problem 3. a lot of problem
S_UA	Doing usual activities' of EQ-5D-Y of student	1 no problem 2 some problem 3. a lot of problem
S_PD	having pain or discomfort' of EQ-5D-Y of student	1 no problem 2 some problem 3. a lot of problem
S_AD	feeling worried, sad or unhappy' of EQ-5D-Y of student	1 no problem 2 some problem 3. a lot of problem
S_vas	How good is your health today? ' visual analogue scale	1~100
